# Supplementary material for: Causal impact of social care, public health and healthcare expenditure on mortality in England: cross-sectional evidence for 2013/2014
Source: PubMed Central journal article supplement — BMJ Open. 2021 Sep 14;11(10):e046417. doi: 10.1136/bmjopen-2020-046417 (PMC8559090; doi:10.1136/bmjopen-2020-046417), 2021-09-14
Supplement: bmjopen-2020-046417.draft_revisions.pdf [file bmjopen-2020-046417.draft_revisions.pdf]

# BMJ Open

BMJ Open is committed to open peer review. As part of this commitment we make the peer review history of every article we publish publicly available.

When an article is published we post the peer reviewers' comments and the authors' responses online. We also post the versions of the paper that were used during peer review. These are the versions that the peer review comments apply to.

The versions of the paper that follow are the versions that were submitted during the peer review process. They are not the versions of record or the final published versions. They should not be cited or distributed as the published version of this manuscript.

BMJ Open is an open access journal and the full, final, typeset and author-corrected version of record of the manuscript is available on our site with no access controls, subscription charges or pay-per-view fees (<http://bmjopen.bmj.com>).

If you have any questions on BMJ Open's open peer review process please email [info.bmjopen@bmj.com](mailto:info.bmjopen@bmj.com)

# BMJ Open

## The mortality effects of social care, public health and healthcare expenditure: cross-sectional evidence from England for 2013/14

|                               |                                                                                                                                                                                                                                                                                                                    |
|-------------------------------|--------------------------------------------------------------------------------------------------------------------------------------------------------------------------------------------------------------------------------------------------------------------------------------------------------------------|
| Journal:                      | <i>BMJ Open</i>                                                                                                                                                                                                                                                                                                    |
| Manuscript ID                 | bmjopen-2020-046417                                                                                                                                                                                                                                                                                                |
| Article Type:                 | Original research                                                                                                                                                                                                                                                                                                  |
| Date Submitted by the Author: | 29-Oct-2020                                                                                                                                                                                                                                                                                                        |
| Complete List of Authors:     | Martin, Stephen; University of York Department of Economics and Related Studies,<br>Longo, Francesco; University of York, Centre for Health Economics<br>Lomas, James; University of York, Centre for Health Economics<br>Claxton, Karl; University of York, Centre for Health Economics & Department of Economics |
| Keywords:                     | HEALTH ECONOMICS, Health policy < HEALTH SERVICES ADMINISTRATION & MANAGEMENT, STATISTICS & RESEARCH METHODS                                                                                                                                                                                                       |
|                               |                                                                                                                                                                                                                                                                                                                    |

SCHOLARONE™  
Manuscripts

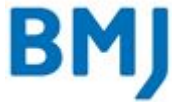

I, the Submitting Author has the right to grant and does grant on behalf of all authors of the Work (as defined in the below author licence), an exclusive licence and/or a non-exclusive licence for contributions from authors who are: i) UK Crown employees; ii) where BMJ has agreed a CC-BY licence shall apply, and/or iii) in accordance with the terms applicable for US Federal Government officers or employees acting as part of their official duties; on a worldwide, perpetual, irrevocable, royalty-free basis to BMJ Publishing Group Ltd ("BMJ") its licensees and where the relevant Journal is co-owned by BMJ to the co-owners of the Journal, to publish the Work in this journal and any other BMJ products and to exploit all rights, as set out in our [licence](#).

The Submitting Author accepts and understands that any supply made under these terms is made by BMJ to the Submitting Author unless you are acting as an employee on behalf of your employer or a postgraduate student of an affiliated institution which is paying any applicable article publishing charge ("APC") for Open Access articles. Where the Submitting Author wishes to make the Work available on an Open Access basis (and intends to pay the relevant APC), the terms of reuse of such Open Access shall be governed by a Creative Commons licence – details of these licences and which [Creative Commons](#) licence will apply to this Work are set out in our licence referred to above.

Other than as permitted in any relevant BMJ Author's Self Archiving Policies, I confirm this Work has not been accepted for publication elsewhere, is not being considered for publication elsewhere and does not duplicate material already published. I confirm all authors consent to publication of this Work and authorise the granting of this licence.

## The mortality effects of social care, public health and healthcare expenditure: cross-sectional evidence from England for 2013/14

### Author/position/address

Dr Stephen Martin

Research Fellow, Department of Economics, University of York, York, YO10 5DD.

Dr Francesco Longo

Research Fellow, Centre for Health Economics, University of York, York, YO10 5DD.

Dr James Lomas

Research Fellow, Centre for Health Economics, University of York, York, YO10 5DD.

Dr Karl Claxton

Professor, Department of Economics & Centre for Health Economics, University of York, York, YO10 5DD.

### Corresponding author and email address

Dr Stephen Martin Email: [sdm1@york.ac.uk](mailto:sdm1@york.ac.uk)

### Copyright statement

The Corresponding Author has the right to grant on behalf of all authors and does grant on behalf of all authors, an exclusive licence (or non-exclusive for government employees) on a worldwide basis to the BMJ Publishing Group Ltd to permit this article (if accepted) to be published in BMJ editions and any other BMJ PGL products and sub-licences such use and exploit all subsidiary rights, as set out in our licence.

### Competing interest statement

All authors have completed the Unified Competing Interest form (available on request from the corresponding author) and declare: financial support from the National Institute for Health Research Policy Research Programme for the submitted work; no financial relationships with any organisations that might have an interest in the submitted work in the previous three years; and no other relationships or activities that could appear to have influenced the submitted work.

### Contributors

All (SM, FL, JL and KC) authors contributed to the concept and design of this paper. SM led on the analysis and drafting, and the final paper was edited and approved by all four authors. The corresponding author attests that all listed authors meet authorship criteria and that no others meeting these criteria have been omitted. SM is the paper's guarantor.

### Transparency declaration

The lead author (the manuscript's guarantor) affirms that the manuscript is an honest, accurate, and transparent account of the study being reported; that no important aspects of the study have been omitted; and that any discrepancies from the study as planned have been explained.

### Details of ethical approval

Ethical approval was not required because neither human participants nor animals were involved in the study.

### Details of funding

This paper reports independent research funded by the National Institute for Health Research Policy Research Programme (NIHR PRP) through its Policy Research Unit in Economic Evaluation of Health & Care Interventions (EEPRU, grant reference PR-PRU-1217-20401).

### Details of the role of the study sponsors

The views expressed in this publication are those of the authors and not necessarily those of the NHS, the National Institute for Health Research or the Department of Health and Social Care (DHSC).

### Statement of independence of researchers from funders

Although funded by the funded by the National Institute for Health Research Policy Research Programme, neither the NIHR nor the DHSC had any influence on the study design, the way in which the research was undertaken, or the results.

### Patient and public involvement statement

Neither patients nor the public were involved in the design, or conduct, or reporting, or dissemination of our research.

### Acknowledgements

We should like to thank NHS Digital for supplying the mortality data. We should also like to acknowledge the assistance received from various individuals including Michael Chaplin at the Department of Health. In addition, we should like to acknowledge the comments received from various individuals at the Department of Health and Social Care and NHS England on an earlier version of this paper. Their suggestions have substantially improved the final version.

### Data sharing statement

All of the raw data are in the public domain. The social care expenditure data is available from the publication ‘Local authority revenue expenditure and financing England: 2013 to 2014 individual local authority data – outturn’ at <https://www.gov.uk/government/statistics/local-authority-revenue-expenditure-and-financing-england-2013-to-2014-individual-local-authority-data-outturn> [accessed 05 September 2020]. The sparsity and input price adjustment variable from the older person’s relative needs formula are available from the publication ‘Calculation of 2013/14 Formula Funding’ at <https://webarchive.nationalarchives.gov.uk/20140505105851/http://www.local.communities.gov.uk/finance/1314/CalcFFs.pdf> [accessed 05 September 2020]. The ‘type of local authority’ dummies are available from the data dictionary in the zip file at <https://digital.nhs.uk/data-and-information/publications/statistical/adult-social-care-activity-and-finance-report/2017-18> [accessed 20 October 2020]. The healthcare expenditure data are available in the 2013-14 CCG Programme Budgeting Benchmarking Tool. This is available from <https://www.england.nhs.uk/prog-budgeting/> [accessed 05 September 2020]. The socio-economic variables are constructed using the 2011 Population Census. Census data is available from the Office for National Statistics at <https://www.ons.gov.uk/peoplepopulationandcommunity/populationandmigration/populationestimates/datasets/2011censuskeystatisticsforlocalauthoritiesinenglandandwales> [accessed 05 September 2020]. The cells used to construct the socio-economic variables are listed in Table 92 of Claxton, K., Martin, S., Soares M, Rice N, Spackman E, Hinde S, Devlin N, Smith PC and Sculpher M. (2015). Methods for the estimation of the National Institute for Health and Care Excellence cost-effectiveness threshold. Health technology assessment, 19(14), pp.1-503. Available from <https://www.ncbi.nlm.nih.gov/books/NBK274318/> [accessed 05 September 2020]. The public health expenditure data are available from ‘Local authority revenue expenditure and financing England: 2013 to 2014 individual local authority data – outturn’ which is available from <https://www.gov.uk/government/statistics/local-authority-revenue-expenditure-and-financing-england-2013-to-2014-individual-local-authority-data-outturn> [accessed 05 September 2020]. The instruments for public health expenditure are available in ‘Exposition Book Public Health Allocations 2013-14 and 2014-15: Technical Guide’ and this is available from [https://assets.publishing.service.gov.uk/government/uploads/system/uploads/attachment\\_data/file/213324/Public-Health-Weighted-Capitation-FormulaTechnical-Guide-v0.13.pdf](https://assets.publishing.service.gov.uk/government/uploads/system/uploads/attachment_data/file/213324/Public-Health-Weighted-Capitation-FormulaTechnical-Guide-v0.13.pdf) [accessed 05 September 2020]. The DFT variable for healthcare expenditure is available from the Department of Health’s website at <https://www.networks.nhs.uk/nhsnetworks/health-investment-network/news/2012-13-programme-budgeting-data-is-now-available> [accessed 05 September 2020], and the MFF and prescribing cost age indices are available from the exposition books for the 2011/12 allocations at <https://www.gov.uk/government/publications/exposition-book-2011-2012> [accessed 05 September 2020].

### Word count

The text consists of 5,589 words. There are four tables in this document. There is one figure in a separate file.

## The mortality effects of social care, public health and healthcare expenditure: cross-sectional evidence from England for 2013/14

### Abstract

#### *Objectives*

The first objective is to estimate the joint impact of social care, public health and healthcare expenditure on mortality in England. The second objective is to use these results to estimate the impact of spending constraints in 2010/11 – 2014/15 on total mortality.

#### *Methods*

The impact of social care, healthcare and public health expenditure on mortality is analysed by applying the two-stage least squares method to local authority data for 2013/14. We compare the growth in healthcare and social care expenditure pre- and post-2010. We use the difference between these growth rates and the responsiveness of mortality to changes in expenditure to estimate the additional mortality generated by post-2010 spending constraints.

#### *Results*

Our most conservative results suggest that: (i) a 1% increase in healthcare expenditure reduces mortality by 0.532%; (ii) a 1% increase in social care expenditure reduces mortality by 0.336%; and (iii) a 1% increase in local public health spending reduces mortality by 0.019%. Using the first two of these elasticities and data on the change in spending growth between 2001/02 - 2009/10 and 2010/11 – 2014/15, we find that there were 57,550 [CI: 3,075-111,955] more deaths in the latter period than would have been observed had spending growth during this period matched that in 2001/02 - 2009/10.

#### *Conclusions*

All three forms of public healthcare-related expenditure save lives. Our results are consistent with the hypothesis that the slowdown in the rate of improvement in life expectancy in England and Wales since 2010 is attributable to spending constraints in the healthcare and social care sectors.

### Strengths and limitations of this study

- Cross-sectional analysis of the impact of social care expenditure on mortality with controls for the level of healthcare and public health expenditure.
- Two-stage least squares regression allows for the endogenous nature of all three types of expenditure.
- Controls for the need for healthcare-related expenditure are also included.
- We compare the growth in healthcare and social care expenditure pre- and post-2010. We find that there were 57,550 more deaths in the latter period than would have been observed had spending growth during this period matched that in the earlier period.
- There may be other factors affecting mortality beyond those included in this study.



# The mortality effects of social care, public health and healthcare expenditure: cross-sectional evidence from England for 2013/14

## 1. Introduction

The rate of improvement in life expectancy in England and Wales has slowed markedly since 2010.<sup>1 2 3</sup> This decline has been most marked for women aged over 85 years and these people tend to be the most physically frail and/or disadvantaged.<sup>4</sup> It has also been noted that the very elderly tend to be the most dependent on a well-functioning publicly-funded health and social care system.<sup>5</sup> As the slowdown in life expectancy growth has coincided with the imposition of government spending constraints, it has been hypothesised that these constraints are the major cause of the stalled improvement in life expectancy.<sup>6</sup>

A recent study assembled annual data on healthcare and social care spending for England from 2001 to 2014 to estimate the impact of the UK government's spending constraints on mortality.<sup>7</sup> Time trend analysis was used to compare the actual mortality rate between 2011 and 2014 with the expected counterfactual rate based on the trend before the imposition of budgetary restrictions in 2010. The study found that spending constraints between 2010 and 2014 were associated with an estimated 45,000 more deaths than would have been expected based on pre-2010 trends.<sup>7</sup>

This finding has generated considerable controversy and merits further investigation. We approach the same issue but from a very different perspective. Instead of extrapolating historic trends at the national level, we use two stage least squares (instrumental variable) regression to estimate the causal relationship between spending and mortality across local authorities at a single point in time (2013/14). Like the time trend study, we consider the impact of both healthcare and social care expenditure on mortality when estimating the size of this effect, but we also control for the impact of public health expenditure.

There are few English studies of the impact of healthcare on mortality, and even fewer of the joint impact of healthcare and public health expenditure on mortality.<sup>8 9</sup> The social care literature has concentrated on the impact of expenditure on the quality of life rather than on

1  
2  
3 mortality.<sup>10</sup> Other studies focus on the relationship between the public social care and  
4 healthcare sectors. They find a substitution effect between social and healthcare services so  
5 that an increase in social care services may improve hospital outcomes, for example, by  
6 reducing delayed discharges.<sup>11 12 13 14</sup> However, we are not aware of any English studies of  
7 the impact of social care on mortality and, by including healthcare and public health, we  
8 present what we believe are the first estimates of the joint impact of social care, healthcare,  
9 and public health expenditure on mortality. We combine these estimates with information  
10 about the size of the post-2010 spending constraints to provide an alternative estimate of how  
11 many lives such constraints cost between 2011 and 2014.  
12  
13  
14  
15  
16  
17  
18  
19

20 The plan of this paper is as follows. Section 2 describes the institutional arrangements  
21 associated with the three types of health-related expenditure that are the focus of this study.  
22 Section 3 describes the health outcome equation to be estimated and how we address the  
23 issue of reverse causation (i.e., that mortality may affect expenditure as well as vice versa).  
24 Section 4 describes our estimation approach and section 5 presents brief details of the dataset.  
25 Section 6 presents our results and there is a discussion of them in section 7.  
26  
27  
28  
29  
30  
31  
32  
33

## 34 **2. Institutional arrangements for health-related expenditure in England in 2013/14**

### 35 *Social care*

36  
37 Adults with a physical disability, a learning disability, or a physical or mental illness often  
38 have difficulty with routine daily activities such as washing, dressing, cooking, and shopping.  
39 Such individuals are usually supported in two main ways: either formally through services  
40 that they or their local authority pay for; and/or informally by family, friends, or  
41 neighbours.<sup>15</sup>  
42  
43  
44  
45  
46  
47  
48  
49

50 Funding for local authorities (LAs) comes from three major sources: the local council tax,  
51 central government grants, and local business rates. The size of the central government grant  
52 will reflect the LA's relative need for expenditure and its income raising capability. LAs  
53 have extensive statutory responsibilities in the area of adult social care and they apply  
54 national criteria to assess whether people's needs are eligible for LA-funded social care.  
55 These national criteria were introduced by the Care Act (2014), and reduced the variation in  
56 the eligibility for LA-funded social care between local areas. Before the introduction of the  
57  
58  
59  
60

1  
2  
3 Care Act, local authorities were able to set their own thresholds for the need for social care  
4 based on the criteria set out in the Fair Access to Care Services framework.<sup>16</sup> Even if eligible  
5 for LA-funded social care, the provision of such funding is means-tested so that, depending  
6 on a person's financial situation, they may be asked to contribute to some or all of their social  
7 care costs.<sup>15</sup>  
8  
9  
10  
11  
12

13 Care needs are often multiple and interrelated with other needs. Adult social care is therefore  
14 part of a complex system of related public services and forms of support. Since 2010  
15 spending constraints imposed by central government may have had some unfortunate effects  
16 on allied public services. For example, there is the long-standing argument that inadequate  
17 social care provision may be responsible for the delayed discharge of elderly patients from  
18 hospital, and that inadequate care in the community may contribute to the growth in  
19 emergency hospital admissions.<sup>17 18</sup> Moreover, inadequate social care provision may be  
20 associated with an increase in mortality. Although social care is primarily concerned with  
21 improving the quality of life, it is perfectly plausible that social care extends life and that  
22 those with care needs enjoy both a lower mortality rate and a better quality of life in those  
23 LAs with more generous social care provision.  
24  
25  
26  
27  
28  
29  
30  
31  
32  
33

### 34 *Public health*

35  
36 Consideration of social care expenditure in isolation is slightly problematic because, since  
37 April 2013, LAs have also been responsible for local public health services. Each 'unitary'  
38 or upper tier local authority receives a fixed annual budget, ring-fenced for public health  
39 activities.<sup>19</sup> For a few services there may be scope to use either the social care or the public  
40 health budget and so, when studying the impact of social care expenditure, it may be wise to  
41 control for expenditure on local public health services. And of course, public health  
42 expenditure will have a direct effect on mortality. Local public health activities accounted  
43 for over £2,500mn of expenditure in 2013/14 and included services related to substance  
44 misuse (roughly one quarter of expenditure), sexual health (roughly one third of expenditure),  
45 children's health (about 10%) and tobacco control (about 5%). Expenditure on national  
46 public health programmes is excluded from the analysis because no breakdown of this  
47 expenditure by locality is available.<sup>20</sup>  
48  
49  
50  
51  
52  
53  
54  
55  
56  
57

### 58 *Healthcare in England*

1  
2  
3 English National Health Service (NHS) healthcare expenditure was managed by 212 Clinical  
4 Commissioning Groups (CCGs) in 2013/14.<sup>21</sup> These local health authorities were each  
5 allocated a fixed annual budget and this was determined centrally in a similar manner to how  
6 each LA was assigned its budget for local public health responsibilities. These budgets were  
7 used by CCGs to fund expenditure on various types of care including inpatient, outpatient  
8 and community care, and pharmaceutical prescriptions. It is worth noting that CCGs did not  
9 have responsibility for either primary care or specialised commissioning in the study year  
10 (2013/14). These were administered centrally and expenditure on these items has been  
11 excluded from the study because data are not available by local area.  
12  
13  
14  
15  
16  
17  
18  
19  
20  
21

### 22 **3. The estimating equation and the selection of instruments for expenditure**

#### 23 *The estimated health outcome equation*

24  
25  
26 We adapt the usual health outcome equation to consider the joint estimation of the impact of  
27 social care, public health and healthcare expenditure on mortality:  
28  
29  
30

$$31 \text{ mortality rate} = f[\text{healthcare expenditure, public health expenditure,} \\ 32 \text{ social care expenditure}] + \text{controls for need} + e \quad (1) \\ 33 \\ 34 \\ 35 \\ 36$$

37 The control variables reflect the need for health-related expenditure, and  $e$  reflects everything  
38 not included elsewhere in the specification.<sup>8</sup> Quantifying the impact of these categories of  
39 expenditure on mortality is challenging for two reasons: first, there might be some reverse  
40 causation with historical outcomes (eg mortality) influencing the current level of  
41 budget/expenditure; and second, there might be some unobserved factor that is driving both  
42 expenditure and mortality.  
43  
44  
45  
46  
47  
48

49 As an illustration of the reverse causation issue consider figure 1. The box defines the  
50 structural model in which the mortality rate depends on social care expenditure and controls  
51 for need (we have omitted healthcare and public health expenditure from the figure for  
52 simplicity). Figure 1a shows that social care expenditure both affects mortality and is  
53 affected by (historical) mortality. This reverse causation links expenditure and the error term  
54 and this makes the ordinary least squares (OLS) estimator biased.  
55  
56  
57  
58  
59  
60

1  
2  
3 Insert Figure 1 near here  
4  
5  
6

7 The solution to this problem is to find variables (known as ‘instruments’) that are good  
8 predictors of expenditure but which have no direct impact on mortality and are unaffected by  
9 unobserved factors. These instruments lie outside the box in figure 1b because they do not  
10 belong in the structural model. They are used to predict the level of expenditure that is not  
11 influenced by either historical mortality or unobserved factors (this is the first stage of the  
12 two-stage least squares approach). Having severed the link with unobserved factors and  
13 mortality, the predicted level of expenditure is used in a regression model to examine the  
14 causal impact of expenditure on mortality (this is the second stage of the two-stage least  
15 squares approach).  
16  
17  
18  
19  
20  
21  
22

23 A recent study of the impact of healthcare expenditure suggested using components of the  
24 formulae used to distribute funding across health authorities as instruments for expenditure.<sup>22</sup>  
25 We adopt this broad approach to identification here because the distribution of funding for all  
26 three types of health-related expenditure is informed by various centrally determined resource  
27 allocation formulae.  
28  
29  
30  
31  
32

### 33 *Instruments for social care expenditure*

34 In the study year (2013/14) each LA received a grant from central government that reflected  
35 its relative need for expenditure on a variety of services for which it was responsible. Each  
36 service area had its own relative needs formula (RNF) that contributed to its overall relative  
37 need, but LAs were free to decide how much to spend in each service area (subject to meeting  
38 their statutory obligations). Adult social care had two relative needs formulae: one for people  
39 aged 18-64, and another for those aged over 65. The relative needs formula for the older  
40 people’s social care included a basic amount per client with top-ups for age, deprivation, low  
41 income, sparsity and local input prices.<sup>23</sup> As any instrument should be well correlated with  
42 expenditure but not directly correlated with mortality, we use the sparsity and input price  
43 adjustment variables from the older person’s relative needs formula as instruments for social  
44 care expenditure.  
45  
46  
47  
48  
49  
50  
51  
52  
53  
54  
55

56 A study of the impact of LA expenditure on home care services approached the instrument  
57 issue from a different perspective.<sup>24</sup> It claimed that social care expenditure will reflect the  
58 service eligibility policy employed by different LAs and that ‘the innate culture and  
59  
60

perspective of the council...will drive the generosity of policies more than small differences in the health of the population'. The researchers proposed the use of a set of four dummy variables reflecting the type of LA (Shire, Unitary, Metropolitan, London) as instruments on the assumption that 'similar' LAs will have 'similar' eligibility policies and expenditure levels.<sup>24</sup>

Finally, we note that LA-funded social care is means tested and, for example, owner occupiers who go into care homes are expected to sell their home to fund their care but that those in rented accommodation have their care costs paid for by the LA. This suggests that the proportion of households that are owner occupied in an area may serve as an instrument for LA social care expenditure (given appropriate controls for health-related need).

Together, the funding rule, the type of LA, and the owner-occupied household variables provide seven potential instruments for social care expenditure.

#### *Instruments for healthcare expenditure*

For our study year (2013/14), each local health authority (212 CCGs) was assigned a fixed share of the national budget (£65bn) by the Department of Health within which they were supposed to meet expenditure on most types of healthcare except primary care, specialised commissioning and public health. With a little simplification, the budget available to each CCG can be expressed as

$$\begin{aligned} \text{local CCG budget per person} = & (\text{national budget per person}) \times \\ & (\text{local age index}) \times \\ & (\text{local additional needs index}) \times \\ & (\text{local input price index}) \times \\ & (\text{local DFT Index}) \end{aligned} \quad (2)$$

where: (i) the age index reflects the demographic profile of the local population; (ii) the additional needs index reflects local deprivation and other factors likely to influence the need for health care and includes a measure of historical mortality; (iii) the input price index (the Market Forces Factor (MFF)) reflects prices in the local health economy; and (iv) the distance from target (DFT) index reflects how far each health authority's actual budget allocation is from its target allocation.<sup>22</sup>

1  
2  
3  
4  
5 Because the additional needs index contains historical mortality, it is clear that reverse  
6 causality is an issue and that this (additional needs) index cannot constitute a plausible  
7 instrument for expenditure. However, the other indices provide suitable instruments for CCG  
8 expenditure. Further details about these instruments are in appendix A1 but, in summary,  
9 these funding rule variables are: (i) the DFT index for the total allocation to CCGs; (ii) the  
10 Market Forces Factor for the Hospital and Community Health Services (HCHS) component  
11 of the total allocation; and (iii) the age index from the cost of prescribing pharmaceuticals  
12 component of the total allocation.  
13  
14  
15  
16  
17  
18  
19

### 20 *Instruments for public health expenditure*

21 While not our primary focus within this paper, we also instrument the public health  
22 expenditure variable using a similar approach to both healthcare and social care expenditure.  
23 The resource allocation formula for the public health grant to local authorities has a similar  
24 structure to the CCG grant (as outlined in equation (2)) and we use two of the four local  
25 adjustment factors for the public health grant (the MFF and the DFT) as instruments for  
26 public health expenditure. Further details about these instruments are in appendix A2.  
27  
28  
29  
30  
31  
32  
33

### 34 *Are the selected instruments plausible?*

35 For all three types of health-related expenditure we use a local input price index (MFF) as an  
36 instrument. While there is no potential for reverse causality, this index might reflect  
37 characteristics of the local (health) economy that could be correlated with unmeasured  
38 determinants of mortality. The plausibility of this instrument therefore depends upon  
39 adequately controlling for need, for which we have over a dozen potential socio-economic  
40 controls in the baseline mortality equation. Further discussion about this instrument is in  
41 appendix A1.  
42  
43  
44  
45  
46  
47  
48  
49

50 The relevant DFT index is used as an instrument for both healthcare and public health  
51 expenditure. The DFT index reflects the fact that, periodically, the national ministry revises  
52 the funding formula and this, together with routine data updates, generates a new target  
53 budget allocation for each health authority. For some authorities, the new funding rule might  
54 generate a large change in its target allocation and, to avoid sudden large reductions in actual  
55 allocations (budgets), such changes are phased into actual budgets over a number of years in  
56 accordance with the Department of Health's 'pace of change' policy.<sup>19</sup> As a result, the DFT  
57  
58  
59  
60

1  
2  
3 index will reflect the resource allocation formula and ‘pace of change’ policy for each of  
4 these two types of expenditure. Any correlation between unmeasured determinants of  
5 mortality and the DFT index would be unexpected and so this instrument appears plausibly  
6 valid given there is unlikely to be an issue with reverse causality and given that controlling  
7 for need should avoid any unexpected confounding effect on mortality.  
8  
9

10  
11  
12  
13 For healthcare expenditure we also use the age index from the prescribing cost component of  
14 the total allocation. As both this variable and the mortality rate are standardised for age so  
15 the prescribing cost age index is unlikely to be correlated with the error from equation (1).  
16  
17  
18

19  
20 Finally, the validity of all instruments is tested empirically using the Hansen-Sargan test.  
21  
22

#### 23 24 25 **4. Estimation approach** 26 27

28  
29 The estimation of equation (1) is complicated by the fact that theory provides little guidance  
30 as to the identity of the appropriate controls for need. Hence, following previous studies, we  
31 identify a dozen socio-economic variables -- such as the proportion of the population of  
32 working age employed in managerial/professional occupations -- as potential controls for the  
33 need for healthcare/public health/social care expenditure.  
34  
35  
36

37  
38  
39 We also have a dozen instruments. There are four ‘type of LA’ dummy variables, two  
40 variables from the relative need formula for social care, and a measure of the local owner-  
41 occupation rate. We also have two potential instruments for public health (the DFT index  
42 and the input price index) from the resource allocation formula. Finally, we have three  
43 potential instruments (the DFT, the input price index and the age index) for healthcare  
44 expenditure from the resource allocation formula for healthcare budgets.  
45  
46  
47  
48  
49

50  
51 Ideally, we would like a more parsimonious set of controls (to reduce multi-collinearity  
52 problems) and a more parsimonious set of instruments (to minimise problems with weak  
53 instruments). To achieve these goals, we first estimate a health outcome equation using OLS  
54 with all controls and all three types of expenditure included. The least significant control is  
55 removed from the specification and the equation is re-estimated. This process – of dropping  
56 the least significant regressor and re-estimating – continues until there are only significant  
57  
58  
59  
60



controls remaining (the expenditure variables are forced to be ever-present). These controls are then included in a two-stage least squares specification and a process similar to backward selection is used to eliminate problematic (invalid and/or weak) instruments.

As a sensitivity analysis we repeat the above analysis but use forward rather than backward selection to identify a parsimonious set of controls.

When estimating regressions, the values for all variables are logged so that regression coefficients can be interpreted as elasticities (for example, the coefficient on an expenditure variable reflects the impact on mortality of a 1% change in the value of the expenditure variable). All observations are weighted by the size of local authority's population. Estimation is undertaken using the *Stata ivreg2* program.<sup>25</sup> Neither patients nor the public were involved in the design, or conduct, or reporting, or dissemination of our research.

## 5. Data

We use the gross current expenditure on adult social services by each local authority in 2013/14 as our measure of social service expenditure.<sup>20</sup> This measure excludes capital charges and, to avoid any double counting issues, it also excludes income from joint commissioning arrangements and income from the NHS. However, it includes income from locally determined (and means tested) client contributions towards their LA care package. This expenditure figure is divided by the LA population size to generate a per capita expenditure figure. As Table 1 shows, the average spend by LA is £324 per person although there is considerable variation in expenditure across the country: for example, social service expenditure ranges from £244 per person in Barnsley to £432 in Camden and £764 in the City of London.

Healthcare expenditure data is available from each CCG's programme budgeting return.<sup>26</sup> These are converted to a local authority basis using a mapping that translates population levels in mid-2012 from (parts of) CCGs to LAs. The average LA healthcare spend was £1,152 per person in 2013/14. Public health expenditure data is available from the local authority revenue expenditure and financing document for 2013/14.<sup>20</sup> The average public health spend for this year was £53 per person. Total healthcare expenditure (£65bn) is about

1  
2  
3 four times the size of social service expenditure (£17bn), and the latter is six times the size of  
4 public health expenditure (£2.5bn).  
5  
6  
7

8 Descriptive statistics for all of the variables employed in the study are in Table 1. The  
9 mortality indicator is the years of life lost per 100,000 people for deaths under age 75. The  
10 mean rate across all LAs is 443 years but this varies considerably, ranging from 268 years (in  
11 the City of London) to 776 years (in Blackpool). There is also considerable variation in the  
12 socio-economic control variables (largely constructed using population census data for 2011).  
13 For example, on average 84% of the population is in the white ethnic group but the average  
14 masks considerable variation, from 29% in Newham (London) to almost 99% in Cumbria, in  
15 Redcar & Cleveland, and in the Isles of Scilly.  
16  
17  
18  
19  
20  
21  
22  
23

24 Finally, descriptive statistics for the instruments for each type of expenditure are at the  
25 bottom of Table 1. Some reveal considerable variation around the country (eg the input price  
26 index for older people's social services) but others do not (eg the impact of population  
27 sparsity on the measure of costs).  
28  
29  
30  
31  
32  
33  
34

## 35 **6. Results**

### 36 *Backward selection*

37 We begin by estimating an OLS specification that includes all 14 controls for the need for  
38 health-related expenditure. Of the 14 controls only six are significant at the 5% level and this  
39 result is in column 1 of Table 2. Application of the backward selection process described  
40 above reveals a more parsimonious set of controls (column 2). If these are included in an IV  
41 specification with all 12 potential instruments, we obtain the result shown in column 3. The  
42 statistical tests reported at the foot of Table 2 suggest that the instrument set associated with  
43 the column 3 result is both invalid (the Hansen-Sargan test statistic is significant) and weak  
44 (only one of the Sanderson-Windmeijer test statistics (for public health expenditure) is about  
45 ten or better). The three first-stage equations used to predict healthcare, social care and  
46 public health expenditure are in columns 1 to 3 respectively of Table A1 in appendix A3.  
47  
48  
49  
50  
51  
52  
53  
54  
55  
56  
57  
58  
59  
60

1  
2  
3 In an attempt to identify which of the instruments are invalid (and hence should not be used),  
4 we re-estimated the specification shown in column 3 of table 2 adding one instrument at a  
5 time to the set of second-stage controls. This process suggests that three instruments (the two  
6 MFF indices and the London local authority dummy) are invalid and re-estimation without  
7 these yields the result shown in column 4 of table 2. As expected, the Hansen-Sargan test  
8 statistic has improved considerably but there is still a weak instrument issue for social service  
9 expenditure (the SW F-statistic is only 4.437). The equation used to predict social service  
10 expenditure is in column 5 of table A1 in appendix A3 and this has three insignificant  
11 instruments (the unitary authority dummy, the area cost adjustment variable and the sparsity  
12 measure).

13  
14  
15  
16  
17  
18  
19  
20  
21  
22 If we re-estimate without these instruments we obtain the second-stage result shown in  
23 column 5 of table 2. The Sanderson-Windmeijer test statistics improve but the Pesaran-  
24 Taylor reset test statistic suggests that there is some mis-specification. The addition of the  
25 squared value of the IMD 2010 resolves reset test issue and generates the result shown in  
26 column 6.

27  
28  
29  
30  
31  
32 Finally, the Sanderson-Windmeijer test statistic for the instruments for social care  
33 expenditure moves above the 'rule of thumb' critical value of ten if the least significant  
34 instrument for this variable (the proportion of households that are owner occupied  
35 households) is deleted from the specification. This result is in column 7 of table 2 (the  
36 corresponding first-stage results are in columns 13 to 15 of table A1 in appendix A3).

#### 37 38 39 40 41 42 *Forward selection*

43  
44 The use of forward selection to identify relevant control variables reveals a similar but  
45 slightly different set of control variables to those from the backward selection process. If this  
46 different set of controls is included in an IV specification with all potential instruments then  
47 we obtain the result shown in column 1 of Table 3 (the corresponding first-stage results are in  
48 columns 1-3 of Table A2 in appendix A3). This has three covariates all of which are  
49 statistically significant with negative coefficients on the three expenditure variables. The  
50 problem with this specification is that the instrument set is not valid but if we drop the four  
51 most problematic instruments and re-estimate, we obtain the result in column 2 of Table 3  
52 (see columns 4-6 of Table A2 in appendix A3 for the first-stage results). Although the  
53 instruments are still invalid at the 5% level (Hansen-Sargan test statistic), there has been  
54  
55  
56  
57  
58  
59  
60

1  
2  
3 considerable improvement. However, the loss of these four instruments has not overcome the  
4 weakness issue associated with the instruments for healthcare and social service expenditure  
5 (the Sandersen-Windmeijer F-statistics are well below ten).  
6  
7  
8  
9

10 If we drop the two least significant instruments we get the result in column 3 of table 3. The  
11 instrument set now shows no evidence of invalidity but there is still some evidence of  
12 weakness. We have no further instruments to add but, if we check to see whether any of the  
13 currently omitted covariates belong in the specification, we find that the addition of the  
14 measure of ‘older person need for social service care’ has a significant positive coefficient.  
15 The inclusion of this variable generates an insignificant coefficient on the ‘owner occupied’  
16 instrument for social service expenditure and, if we re-estimate without this, we obtain the  
17 result shown in column 4 of table 3. In this specification the expenditure variables are  
18 endogenous, the instrument set is valid, and the instruments for each expenditure variable  
19 demonstrate no evidence of weakness. There is also no evidence of mis-specification.  
20  
21  
22  
23  
24  
25  
26  
27  
28  
29

## 30 **7. Discussion**

31  
32  
33 In a recent paper annual data on healthcare and social care spending for England from 2001  
34 to 2014 was used to estimate the impact of the UK government’s austerity programme on  
35 mortality.<sup>7</sup> Time trend analysis was used to compare actual mortality rates in 2011-2014 with  
36 the counterfactual rates expected based on trends before the imposition of austerity. These  
37 authors found that spending constraints between 2010 and 2014 were associated with 45,368  
38 more deaths than would have been expected based on pre-2010 trends.  
39  
40  
41  
42  
43  
44  
45

46 We can use the outcome elasticities reported above to present some alternative but  
47 comparable estimates and these are summarised in table 4. The public health elasticities are  
48 not included in the excess deaths calculations. The time trend analysis did not consider the  
49 impact of public health expenditure, probably because such expenditure was not specifically  
50 identified before 2013/14. We have included this variable in the mortality outcome equations  
51 estimated here because our study year (2013/14) is the first year for which public health  
52 expenditure data is reported and its omission may bias the estimated coefficients on the other  
53 two healthcare-related types of expenditure. Moreover, a recent paper suggests that public  
54 health expenditure has a significant effect on mortality.<sup>9</sup>  
55  
56  
57  
58  
59  
60

1  
2  
3  
4  
5 The outcome elasticities associated with healthcare and social care expenditure are in column  
6 1 (backward selection) and column 2 (forward selection) of table 4. The time trend study  
7 reports that real social care spending per capita increased by 2.20% between 2001/02 and  
8 2009/10 but decreased by 1.57% between 2010/11 and 2014/15. If this annual difference  
9 (3.77%) is applied to each of the latter four years then the total spending gap is 15.08%  
10 (column 3). In 2012 there were 467,000 deaths in England. The more conservative of the  
11 two social care elasticity estimates suggests that a 1% increase in spend would save 1,569  
12 lives (=0.336% of 467,000). Hence the 'loss' of 15.08% of social care expenditure over the  
13 period 2010/11 to 2014/15 is associated with 23,662 excess deaths.  
14  
15  
16  
17  
18  
19  
20  
21

22 A similar calculation can be undertaken for healthcare expenditure. The time trend study  
23 reports that real healthcare spending per capita increased by 3.82% between 2001/02 and  
24 2009/10 but by 0.41% between 2010/11 and 2014/15. If this annual difference (3.41%) is  
25 applied to each of the latter four years then the total spending gap attributable to austerity is  
26 13.64%. Our healthcare elasticity suggests that a 1% increase in spend would save 2,484  
27 lives (=0.532% of 467,000). Hence the 'loss' of 13.64% of healthcare expenditure over the  
28 period 2010/11 to 2014/15 is associated with 33,888 excess deaths.  
29  
30  
31  
32  
33  
34  
35

36 The more conservative of our two sets of results suggest that the constraints on the growth of  
37 healthcare and social care expenditure during this period of 'austerity' have been associated  
38 with 57,550 (=23,662+33,888) more deaths than would have been observed had expenditure  
39 growth followed pre-2010 trends. The less conservative of our two sets of results suggests an  
40 even larger number deaths (see column 5 of table 4), and both estimates can be compared  
41 with the results from the time trend study (see column 6 of table 4).<sup>7</sup>  
42  
43  
44  
45  
46  
47

48 Although our study has adopted an entirely different approach to the time trend study it  
49 reveals a broadly similar picture: that 'austerity' related reductions in the growth of  
50 healthcare and social care expenditure have been associated with a much larger number of  
51 deaths than would have been expected had pre-austerity expenditure trends continued.  
52  
53  
54  
55

56 Both the healthcare and social care expenditure variables have a significant negative effect on  
57 mortality in both the backward and forward selection specifications, and the public health  
58 effect is also statistically significant in the latter specification. If we focus on the more  
59  
60

1  
2  
3 conservative estimates (from the backward selection specification) we note that the  
4 coefficient on social care expenditure is -0.336. This suggests that a 1% increase in  
5 expenditure is associated with a 0.336% reduction in mortality. The coefficient on healthcare  
6 expenditure is larger (absolutely) at -0.532 but it should be noted that a 1% boost in the  
7 healthcare budget would cost about four times as much as a 1% boost in social care  
8 expenditure.  
9

10  
11  
12  
13  
14  
15 The coefficient on healthcare expenditure, -0.532 (backward selection) or -0.693 (forward  
16 selection) can be compared with that reported by a recent study that undertook a similar  
17 analysis of English data for 2013/14 but which excluded social care expenditure from the  
18 estimating equation. In that study the coefficient on healthcare expenditure was -0.672.<sup>9</sup> The  
19 difference between these estimates is relatively small. Several recent studies from Australia,  
20 England, Spain and Sweden have sought to establish how responsive mortality is to changes  
21 in health care expenditure.<sup>27 28 29 30</sup> These studies have typically omitted other types of health-  
22 related expenditure but our findings suggest that the addition of these other types of  
23 expenditure will have little impact on the responsiveness of mortality to healthcare  
24 expenditure.  
25  
26  
27  
28  
29  
30  
31  
32

33  
34 As social care expenditure is designed primarily to improve recipients' quality of life, it is  
35 slightly surprising that the coefficient on social care is as large as -0.336, particularly when  
36 the elasticity associated with healthcare expenditure is -0.532 (both figures are backward  
37 selection estimates). To understand this relatively large mortality response to social care  
38 expenditure we need to distinguish between the *direct* and *indirect* effects of healthcare and  
39 social care expenditure. Healthcare expenditure has a primarily *direct* effect on mortality;  
40 we would expect areas with better healthcare provision to have lower mortality rates because  
41 more expenditure will buy more (and better quality) medical staff and facilities, and these  
42 inputs are directly responsible for life saving healthcare.  
43  
44  
45  
46  
47  
48  
49  
50

51 Social care on the other hand may generate both *direct* and *indirect* effects on mortality, and  
52 the relative size of each effect is unclear. There will be a direct effect via the prevention of  
53 life-threatening conditions (for example, better social care provision might mean that  
54 vulnerable people are less likely to have life-threatening falls), but there will also be an  
55 indirect effect where better social care facilitates access by others to healthcare services. For  
56 example, if a patient cannot be discharged from hospital due to a lack of social care provision  
57  
58  
59  
60

1  
2  
3 (eg due to a lack of care in the community or residential home beds), their hospital bed  
4 cannot be used by others who might benefit from it. In this way the indirect effect of social  
5 care facilitates lower mortality, not for those receiving the social care, but for those who are  
6 able to access healthcare sooner than they would otherwise have done.  
7  
8  
9

### 10 11 *Study limitations*

12 This study is constrained by the availability of mortality data and health-related expenditure  
13 data, and the implementation of central government funding formulae with exogenous  
14 elements for all three types of expenditure. Our study year (2013/14) is the first year for  
15 which there were resource allocation formulae for both health care and public health  
16 expenditure, and a relative needs formula informed the allocation of central government  
17 funding to LAs for social care. As a result, estimation of a panel data specification is not  
18 permitted by the data.  
19  
20  
21  
22  
23  
24  
25

26  
27 The estimated mortality equation contains no dynamics and implicitly assumes that all health  
28 benefits occur contemporaneously with expenditure. However, as our health outcome  
29 measure reflects mortality in both the same year as expenditure and also in the two  
30 subsequent years, we do capture some of the lagged effect. Nevertheless, we readily  
31 acknowledge that some health benefits associated with current expenditure may occur many  
32 years later. At the same time, however, we also acknowledge that current mortality may  
33 reflect health-related expenditure from many years ago. Our implicit assumption is that these  
34 two effects broadly cancel out each other so that, by relating current expenditure to current  
35 outcomes, we obtain a reasonable estimate of the total effect of expenditure on mortality.  
36  
37  
38  
39  
40  
41  
42  
43

44 There is also the possibility that we have omitted a relevant confounder (eg one that affects  
45 both mortality and expenditure) from our regression specifications and such an omission may  
46 affect the size of the mortality response to expenditure.  
47  
48  
49  
50  
51

### 52 53 **8. Concluding remarks**

54  
55  
56 Our results – using an entirely different estimation approach – have confirmed the results  
57 reported previously: that the restrictions on the growth in health and social care expenditure  
58  
59  
60

1  
2  
3 during 'austerity' have been associated with tens of thousands more deaths than would have  
4 been observed had pre-austerity expenditure growth been sustained.<sup>7</sup>  
5  
6  
7

8 While previous studies have found significant negative effects on mortality of health care and  
9 public health expenditure, this study makes a major contribution in additionally estimating  
10 the effect on mortality of social care expenditure. There is evidence that all three types of  
11 health-related expenditure have a significant negative effect on mortality, and the addition of  
12 social care expenditure in the health outcome equation has little effect on the size of the  
13 mortality response to changes in healthcare expenditure.  
14  
15  
16  
17  
18  
19  
20  
21  
22  
23  
24  
25  
26  
27  
28  
29  
30  
31  
32  
33  
34  
35  
36  
37  
38  
39  
40  
41  
42  
43  
44  
45  
46  
47  
48  
49  
50  
51  
52  
53  
54  
55  
56  
57  
58  
59  
60

For peer review only



## References

1. Demakakos, P. (2019). Austerity, socioeconomic inequalities and stalling life expectancy in the UK: Two parallel stories or one? *Maturitas*, 123, pp89-90. Available from <https://doi.org/10.1016/j.maturitas.2018.12.007> [accessed 05 September 2020].
2. Hiam, L., Dorling, D. and McKee, M. (2018). The cuts and poor health: when and how can we say that one thing causes another? *Journal of the Royal Society of Medicine*, 111(6), 199–202. Available from <https://doi.org/10.1177/0141076818779237> [accessed 05 September 2020].
3. Marmot M. J (2018). *J Epidemiol Community Health*, May, Vol 72 No 5, pp359-360. Available from <https://jech.bmj.com/content/jech/72/5/359.full.pdf> [accessed 05 September 2020].
4. Hiam L, Harrison D, McKee M and D Dorling (2018). Why is life expectancy in England and Wales ‘stalling’? *J Epidemiol Community Health* 2018, 72, 404-408. Available from <https://jech.bmj.com/content/jech/72/5/404.full.pdf> [accessed 05 September 2020].
5. Faragher, R. (2017). Is austerity really to blame for stalling life expectancy in England? *The Conversation*, 20 July, 2017. Available from <http://theconversation.com/is-austerity-really-to-blame-for-stalling-life-expectancy-in-england-81206> [accessed 05 September 2020].
6. Dorling, D (2019). Austerity bites—falling life expectancy in the UK. *BMJ*, March 19. Available from <https://blogs.bmj.com/bmj/2019/03/19/danny-dorling/> [accessed 05 September 2020].
7. Watkins J, Wulaningsih W, Da Zhou C, *et al* (2017). Effects of health and social care spending constraints on mortality in England: a time trend analysis. *BMJ Open* 2017, v7, 11. DOI: 10.1136/bmjopen-2017-017722 [accessed 05 September 2020].
8. Claxton, K., Lomas, J. and Martin, S. (2018). The impact of NHS expenditure on health outcomes in England: Alternative approaches to identification in all-cause and disease specific models of mortality. *Health Economics*, 27(6), pp.1017-1023. Available at: <https://onlinelibrary.wiley.com/doi/abs/10.1002/hec.3650> [accessed 05 September 2020].
9. Martin, S., Lomas, J. and Claxton, K. (2020). Is an ounce of prevention worth a pound of cure? Estimates of the impact of English public health grant on mortality and morbidity. *BMJ Open*, volume 10, issue10. Available at: <https://bmjopen.bmj.com/content/10/10/e036411> [accessed 20 October 2020].
10. Forder, J., Vadean, F., Rand, S. & Malley, J. (2018). The impact of long-term care on quality of life. *Health economics*, 27, e43-e58. Available from <https://onlinelibrary.wiley.com/doi/10.1002/hec.3612> [accessed 05 September 2020].
11. Fernandez, J.-L. and Forder, J. (2011). Consequences of local variations in social care on the performance of the acute health care sector. *Applied Economics*, 40, 1503-1518.

1  
2  
3 Available from <https://www.tandfonline.com/doi/full/10.1080/00036840600843939>  
4 [accessed from 05 September 2020].  
5  
6

7 12. Forder, J. (2009). Long-term care and hospital utilisation by older people: an analysis of  
8 substitution rates. *Health Economics*, 18, 1322-1338. Available from  
9 <https://onlinelibrary.wiley.com/doi/abs/10.1002/hec.1438> [accessed 05 September 2020].  
10  
11

12 13. Gaughan, J., Gravelle, H. and Siciliani, L. (2015). Testing the bed-blocking hypothesis:  
13 does nursing and care home supply reduce delayed hospital discharges? *Health economics*,  
14 24, 32-44. Available from <https://onlinelibrary.wiley.com/doi/10.1002/hec.3150> [accessed  
15 05 September 2020].  
16  
17

18 14. Forder, J., Gousia, K. & Saloniki, E.-C. (2018). The impact of long-term care on primary  
19 care doctor consultations for people over 75 years. *The European Journal of Health*  
20 *Economics*, 1-13. Available from  
21 [https://ideas.repec.org/a/spr/eujhec/v20y2019i3d10.1007\\_s10198-018-0999-6.html](https://ideas.repec.org/a/spr/eujhec/v20y2019i3d10.1007_s10198-018-0999-6.html) [accessed  
22 05 September 2020].  
23  
24

25 15. NAO (2018). Adult social care at a glance. National Audit Office, July. Available from  
26 <https://www.nao.org.uk/wp-content/uploads/2018/07/Adult-social-care-at-a-glance.pdf>  
27 [accessed 05 September 2020].  
28  
29

30 16. Department of Health (2002). Fair access to care services guidance on eligibility criteria  
31 for adult social care. Available from  
32 [https://webarchive.nationalarchives.gov.uk/20121205180615/http://www.dh.gov.uk/prod\\_consum\\_dh/groups/dh\\_digitalassets/@dh/@en/documents/digitalasset/dh\\_4019641.pdf](https://webarchive.nationalarchives.gov.uk/20121205180615/http://www.dh.gov.uk/prod_consum_dh/groups/dh_digitalassets/@dh/@en/documents/digitalasset/dh_4019641.pdf) [accessed  
33 05 September 2020]  
34  
35  
36

37 17. NAO (2014). Planning for the Better Care Fund. National Audit Office, November.  
38 Available from <https://www.nao.org.uk/wp-content/uploads/2014/11/Planning-for-the-better-care-fund.pdf> [accessed 05 September 2020].  
39  
40  
41

42 18. NAO (2017). Health and social care integration. National Audit Office, February.  
43 Available from  
44 <https://www.nao.org.uk/wp-content/uploads/2017/02/Health-and-social-care-integration.pdf>  
45 [accessed 05 September 2020].  
46  
47

48 19. DH (2012). Exposition Book Public Health Allocations 2013-14 and 2014-15: Technical  
49 Guide. Available from  
50 [https://assets.publishing.service.gov.uk/government/uploads/system/uploads/attachment\\_data/file/213324/Public-Health-Weighted-Capitation-Formula-Technical-Guide-v0.13.pdf](https://assets.publishing.service.gov.uk/government/uploads/system/uploads/attachment_data/file/213324/Public-Health-Weighted-Capitation-Formula-Technical-Guide-v0.13.pdf)  
51 [accessed 05 September 2020].  
52  
53  
54  
55  
56  
57  
58  
59  
60

- 1  
2  
3  
4  
5  
6  
7  
8  
9  
10  
11  
12  
13  
14  
15  
16  
17  
18  
19  
20  
21  
22  
23  
24  
25  
26  
27  
28  
29  
30  
31  
32  
33  
34  
35  
36  
37  
38  
39  
40  
41  
42  
43  
44  
45  
46  
47  
48  
49  
50  
51  
52  
53  
54  
55  
56  
57  
58  
59  
60
20. MCHLG (2015). Local authority revenue expenditure and financing England: 2013 to 2014 individual local authority data – outturn. Available from <https://www.gov.uk/government/statistics/local-authority-revenue-expenditure-and-financing-england-2013-to-2014-individual-local-authority-data-outturn> [accessed 05 September 2020].
21. NHS England (2012). Allocations for 2014/15. Available from <https://www.england.nhs.uk/allocations/allocations-2013-14/> [accessed 05 September 2020].
22. Andrews, M. et al., 2017. Inference in the presence of redundant moment conditions and the impact of government health expenditure on health outcomes in England. *Econometric Reviews*, 36(1–3), pp.23–41. Available from <https://www.tandfonline.com/doi/full/10.1080/07474938.2016.1114205> [accessed 05 September, 2020].
23. DCLG (2013). Calculation of 2013/14 Formula Funding. January. See <https://webarchive.nationalarchives.gov.uk/20140505105851/http://www.local.communities.gov.uk/finance/1314/CalcFFs.pdf> [accessed 05 September 2020].
24. Forder, J, Malley, J, Towers A, and A Netten (2014). Using cost-effectiveness estimates from survey data to guide commissioning: an application to home care. *Health Economics*, 23, 8, pp979-992. Available from <https://doi.org/10.1002/hec.2973> [accessed 05 September 2020].
25. Baum, C.F., Schaffer, M.E., Stillman, S. (2010). ivreg2: Stata module for extended instrumental variables/2SLS, GMM and AC/HAC, LIML and k-class regression. Available from <http://ideas.repec.org/c/boc/bocode/s425401.html> [accessed 05 September 2020].
26. NHS England (2015). 2013-14 CCG Programme Budgeting Benchmarking Tool. Available from <https://www.england.nhs.uk/prog-budgeting/> [accessed 05 September 2020].
27. Edney, L.C., Afzali, H.H.A., Cheng, T.C., Karnon, J.(2018). Estimating the reference incremental cost-effectiveness ratio for the Australian Health System. *Pharmacoeconomics* 36(2), 239–252. Available from <https://link.springer.com/article/10.1007/s40273-017-0585-2> [accessed 05 September 2020].
28. Siverskog, J. & Henriksson, M (2019). Estimating the marginal cost of a life year in Sweden’s public healthcare sector. *Eur J Health Econ* (2019) 20: 751. Available from <https://doi.org/10.1007/s10198-019-01039-0> [accessed 05 September 2020].
29. Vallejo-Torres, L., Garcia-Lorenzo, B., Serrano-Aguilar, P. (2018). Estimating a cost-effectiveness threshold for the Spanish NHS. *Health Economics*, 27(4), 746–761. Available from <https://onlinelibrary.wiley.com/doi/10.1002/hec.3633> [accessed 05 September 2020].
30. Claxton, K., Martin, S., Soares M, Rice N, Spackman E, Hinde S, Devlin N, Smith PC and Sculpher M. (2015). Methods for the estimation of the National Institute for Health and

1  
2  
3 Care Excellence cost-effectiveness threshold. Health technology assessment, 19(14), pp.1-  
4 503. Available from <https://www.ncbi.nlm.nih.gov/pubmed/25692211> [accessed 05  
5 September 2020].  
6  
7  
8  
9  
10  
11  
12  
13  
14  
15  
16  
17  
18  
19  
20  
21  
22  
23  
24  
25  
26  
27  
28  
29  
30  
31  
32  
33  
34  
35  
36  
37  
38  
39  
40  
41  
42  
43  
44  
45  
46  
47  
48  
49  
50  
51  
52  
53  
54  
55  
56  
57  
58  
59  
60

For peer review only

Table 1 Descriptive statistics for variables employed in study

| Variable description                                                                 | Obs | Mean    | Std. Dev. | Min     | Max       |
|--------------------------------------------------------------------------------------|-----|---------|-----------|---------|-----------|
| <i>Mortality rate, population, and expenditure variables</i>                         |     |         |           |         |           |
| Years of life lost rate, standardised, per 100,000 population, 2013/2014/2015 pooled | 151 | 443.3   | 85.0      | 267.5   | 775.9     |
| Local authority population, 2013/14                                                  | 151 | 369,610 | 271,897   | 2,381   | 1,481,378 |
| Social service spend per person, 2013/14, £                                          | 151 | 306.60  | 46.58     | 209.08  | 660.42    |
| NHS healthcare spend per person, 2013/14, £                                          | 151 | 1152.13 | 75.81     | 1019.89 | 1479.11   |
| Public health expenditure per person, 2013/14, £                                     | 152 | 52.60   | 25.15     | 18.52   | 186.21    |
| <i>Controls</i>                                                                      |     |         |           |         |           |
| Index of Multiple Deprivation 2010                                                   | 152 | 23.0753 | 8.6040    | 5.4466  | 43.4465   |
| Young adult social service need per person                                           | 151 | 1.0000  | 0.2519    | 0.4341  | 1.7546    |
| Older adult social service need per person                                           | 151 | 1.0000  | 0.2329    | 0.5714  | 1.9716    |
| Proportion of all residents born outside the European Union                          | 152 | 0.1281  | 0.1147    | 0.0144  | 0.5060    |
| Proportion of population in white ethnic group                                       | 152 | 0.8364  | 0.1626    | 0.2897  | 0.9882    |
| Proportion of population providing unpaid care                                       | 152 | 0.1008  | 0.0138    | 0.0651  | 0.1289    |
| Proportion of population aged 16-74 with no qualifications                           | 152 | 0.2469  | 0.0606    | 0.0720  | 0.3874    |
| Proportion of households without a car                                               | 152 | 0.2862  | 0.1248    | 0.0899  | 0.6940    |
| Proportion of households that are one pensioner households, 2011                     | 152 | 0.1206  | 0.0208    | 0.0596  | 0.1667    |
| Proportion of households that are lone parent households with dependent children     | 152 | 0.0745  | 0.0185    | 0.0208  | 0.1436    |
| Proportion of population aged 16-74 that are permanently sick                        | 152 | 0.0424  | 0.0149    | 0.0086  | 0.0879    |
| Proportion of those aged 16-74 that are long-term unemployed                         | 152 | 0.0183  | 0.0058    | 0.0043  | 0.0367    |
| Proportion of those aged 16-74 in employment that are working agriculture            | 152 | 0.0064  | 0.0099    | 0.0003  | 0.0572    |
| Proportion of those aged 16-74 in managerial and professional occupations            | 152 | 0.3114  | 0.0769    | 0.1835  | 0.6674    |
| <i>Instruments: for social service (GSS) expenditure</i>                             |     |         |           |         |           |
| Type of LA: county council                                                           | 152 | 0.1776  | 0.3835    | 0.0000  | 1.0000    |
| Type of LA: London borough                                                           | 152 | 0.2171  | 0.4136    | 0.0000  | 1.0000    |
| Type of LA: Metropolitan district                                                    | 152 | 0.2368  | 0.4266    | 0.0000  | 1.0000    |
| Type of LA: Unitary authority                                                        | 152 | 0.3684  | 0.4840    | 0.0000  | 1.0000    |
| Input price index for older people's social services                                 | 152 | 1.0426  | 0.0634    | 1.0000  | 1.3607    |
| Population sparsity measure                                                          | 151 | 1.0057  | 0.0079    | 1.0000  | 1.0345    |
| Proportion of households that are owner occupied                                     | 152 | 0.6190  | 0.1152    | 0.2611  | 0.8086    |
| <i>Instruments: for public health (PH) expenditure</i>                               |     |         |           |         |           |
| Distance from target index, public health expenditure, 2013/14                       | 152 | 1.0667  | 0.5362    | 0.5392  | 6.6247    |
| Input price index (MFF), public health expenditure, 2013/14                          | 152 | 1.0122  | 0.0790    | 0.9151  | 1.2076    |
| <i>Instruments: for NHS healthcare (PB) expenditure</i>                              |     |         |           |         |           |
| Distance from target index, NHS healthcare expenditure                               | 152 | 1.0055  | 0.0515    | 0.9282  | 1.2250    |
| Input price index (MFF), resource allocation HCHS formula                            | 152 | 1.0063  | 0.0643    | 0.9319  | 1.1416    |
| Age index, resource allocation prescribing formula                                   | 152 | 0.9776  | 0.1283    | 0.6422  | 1.3007    |

Table 2 Obtaining a preferred health outcome specification for social care, healthcare and public health expenditure, backward selection (second-stage results)

|                                                | (1)                | (2)                        | (3)                        | (4)              | (5)              | (6)              | (7)              |
|------------------------------------------------|--------------------|----------------------------|----------------------------|------------------|------------------|------------------|------------------|
|                                                | All causes         | All causes                 | All causes                 | All causes       | All causes       | All causes       | All causes       |
|                                                | 2013/14            | 2013/14                    | 2013/14                    | 2013/14          | 2013/14          | 2013/14          | 2013/14          |
|                                                | PB/GSS/PH spend    | PB/GSS/PH spend            | PB/PSS/PH spend            | PB/PSS/PH spend  | PB/PSS/PH spend  | PB/PSS/PH spend  | PB/PSS/PH spend  |
|                                                | SYLLR 2013/14/15   | SYLLR 2013/14/15           | SYLLR 2013/14/15           | SYLLR 2013/14/15 | SYLLR 2013/14/15 | SYLLR 2013/14/15 | SYLLR 2013/14/15 |
|                                                | outcome model      | outcome model              | outcome model              | outcome model    | outcome model    | outcome model    | outcome model    |
|                                                |                    |                            | instrument                 | instrument       | instrument       | instrument       | instrument       |
|                                                |                    |                            | PB/GSS/PH spend            | PB/GSS/PH spend  | PB/GSS/PH spend  | PB/GSS/PH spend  | PB/GSS/PH spend  |
|                                                | weighted           | weighted                   | weighted                   | weighted         | weighted         | weighted         | weighted         |
|                                                | OLS                | OLS                        | IV second stage            | IV second stage  | IV second stage  | IV second stage  | IV second stage  |
|                                                | full specification | parsimonious specification | parsimonious specification | parsimonious_v2  | parsimonious_v3  | parsimonious_v4  | parsimonious_v5  |
| VARIABLES                                      |                    |                            |                            |                  |                  |                  |                  |
| Public health expenditure per person           | 0.037              | 0.029                      | 0.017                      | 0.010            | 0.017            | -0.018           | -0.019           |
|                                                | [0.027]            | [0.027]                    | [0.032]                    | [0.039]          | [0.042]          | [0.041]          | [0.041]          |
| CCG (PB) healthcare spend per person           | -0.406***          | -0.492***                  | -0.840***                  | -0.609**         | -0.514           | -0.545**         | -0.532**         |
|                                                | [0.139]            | [0.119]                    | [0.142]                    | [0.251]          | [0.337]          | [0.243]          | [0.259]          |
| Social service (GSS) spend per person          | 0.044              | 0.039                      | -0.078                     | -0.272**         | -0.326*          | -0.344**         | -0.336**         |
|                                                | [0.055]            | [0.053]                    | [0.102]                    | [0.124]          | [0.182]          | [0.134]          | [0.152]          |
| Index of Multiple Deprivation 2010             | 0.219***           | 0.156**                    | 0.239***                   | 0.243***         | 0.238***         | -0.504*          | -0.505**         |
|                                                | [0.074]            | [0.066]                    | [0.059]                    | [0.068]          | [0.075]          | [0.260]          | [0.255]          |
| Young adult social service need per person     | 0.096              |                            |                            |                  |                  |                  |                  |
|                                                | [0.166]            |                            |                            |                  |                  |                  |                  |
| Older adult social service need per person     | 0.080              |                            |                            |                  |                  |                  |                  |
|                                                | [0.073]            |                            |                            |                  |                  |                  |                  |
| % residents born outside the European Union    | -0.038*            |                            |                            |                  |                  |                  |                  |
|                                                | [0.020]            |                            |                            |                  |                  |                  |                  |
| % population in white ethnic group             | 0.172***           | 0.227***                   | 0.289***                   | 0.309***         | 0.309***         | 0.321***         | 0.319***         |
|                                                | [0.054]            | [0.036]                    | [0.036]                    | [0.038]          | [0.041]          | [0.041]          | [0.046]          |
| % population providing unpaid care             | -0.455***          | -0.233***                  | -0.214**                   | -0.251**         | -0.230**         | -0.188**         | -0.190**         |
|                                                | [0.171]            | [0.086]                    | [0.087]                    | [0.098]          | [0.108]          | [0.085]          | [0.085]          |
| % population aged 16-74 with no qualifications | -0.043             |                            |                            |                  |                  |                  |                  |
|                                                | [0.101]            |                            |                            |                  |                  |                  |                  |
| % households without a car                     | -0.201***          |                            |                            |                  |                  |                  |                  |
|                                                | [0.074]            |                            |                            |                  |                  |                  |                  |
| % households that are one pensioner households | 0.057              |                            |                            |                  |                  |                  |                  |
|                                                | [0.073]            |                            |                            |                  |                  |                  |                  |

|    |                                                     |           |           |           |           |          |           |           |  |
|----|-----------------------------------------------------|-----------|-----------|-----------|-----------|----------|-----------|-----------|--|
| 1  | % lone parent households with dependent children    | 0.025     |           |           |           |          |           |           |  |
| 2  |                                                     | [0.065]   |           |           |           |          |           |           |  |
| 3  | % population aged 16-74 that are permanently sick   | 0.162*    | 0.217***  | 0.229***  | 0.262***  | 0.259*** | 0.271***  | 0.271***  |  |
| 4  |                                                     | [0.097]   | [0.069]   | [0.071]   | [0.087]   | [0.098]  | [0.080]   | [0.079]   |  |
| 5  | % aged 16-74 that are long-term unemployed          | 0.057     |           |           |           |          |           |           |  |
| 6  |                                                     | [0.057]   |           |           |           |          |           |           |  |
| 7  | % aged 16-74 in employment working agriculture      | -0.013    |           |           |           |          |           |           |  |
| 8  |                                                     | [0.012]   |           |           |           |          |           |           |  |
| 9  | % aged 16-74 in managerial/professional occupations | -0.241*** | -0.285*** | -0.190*** | -0.162*** | -0.154** | -0.098    | -0.100    |  |
| 10 |                                                     | [0.063]   | [0.044]   | [0.050]   | [0.051]   | [0.060]  | [0.062]   | [0.065]   |  |
| 11 | Index of Multiple Deprivation 2010 Squared          |           |           |           |           |          | 0.130***  | 0.130***  |  |
| 12 |                                                     |           |           |           |           |          | [0.043]   | [0.042]   |  |
| 13 | Constant                                            | 7.319***  | 8.862***  | 11.187*** | 9.408***  | 8.710*** | 10.277*** | 10.199*** |  |
| 14 |                                                     | [1.040]   | [0.819]   | [1.021]   | [1.693]   | [2.295]  | [1.568]   | [1.662]   |  |
| 15 | Observations                                        | 150       | 150       | 150       | 150       | 150      | 150       | 150       |  |
| 16 | R-squared                                           | 0.919     | 0.908     |           |           |          |           |           |  |
| 17 | Ramsey reset F statistic                            | 5.096     | 6.448     |           |           |          |           |           |  |
| 18 | Probability > F                                     | 0.002     | 0.000     |           |           |          |           |           |  |
| 19 | Endogeneity test statistic                          |           |           | 8.934     | 15.536    | 15.510   | 23.482    | 18.528    |  |
| 20 | Endogeneity p-value                                 |           |           | 0.030     | 0.001     | 0.001    | 0.000     | 0.000     |  |
| 21 | Hansen-Sargan test statistic                        |           |           | 21.671    | 10.327    | 2.506    | 0.265     | 0.257     |  |
| 22 | Hansen-Sargan p-value                               |           |           | 0.006     | 0.066     | 0.286    | 0.876     | 0.612     |  |
| 23 | Pesaran-Taylor reset statistic                      |           |           | 0.187     | 2.892     | 3.540    | 0.008     | 0.285     |  |
| 24 | Pesaran-Taylor p-value                              |           |           | 0.665     | 0.089     | 0.060    | 0.927     | 0.593     |  |
| 25 | Sanderson-Windmeijer_PB F-statistic                 |           |           | 8.390     | 8.966     | 13.333   | 14.352    | 15.818    |  |
| 26 | Sanderson-Windmeijer_PB p-value                     |           |           | 0.000     | 0.000     | 0.000    | 0.000     | 0.000     |  |
| 27 | Sanderson-Windmeijer_GSS F-statistic                |           |           | 4.437     | 4.875     | 6.720    | 9.063     | 11.567    |  |
| 28 | Sanderson-Windmeijer_GSS p-value                    |           |           | 0.000     | 0.000     | 0.000    | 0.000     | 0.000     |  |
| 29 | Sanderson-Windmeijer_PH F-statistic                 |           |           | 28.259    | 37.927    | 56.035   | 56.146    | 59.408    |  |
| 30 | Sanderson-Windmeijer_PH p-value                     |           |           | 0.000     | 0.000     | 0.000    | 0.000     | 0.000     |  |
| 31 | Robust standard errors in brackets                  |           |           |           |           |          |           |           |  |
| 32 | *** p<0.01, ** p<0.05, * p<0.1                      |           |           |           |           |          |           |           |  |

Table 3 Obtaining a joint preferred specification for social care, healthcare and public health expenditure by combining full specifications with forward selection (second-stage results)

|                                                   | (1)                        | (2)                     | (3)                     | (4)                     |
|---------------------------------------------------|----------------------------|-------------------------|-------------------------|-------------------------|
|                                                   | All causes                 | All causes              | All causes              | All causes              |
|                                                   | 2013/14 PB/PSS/PH spend    | 2013/14 PB/PSS/PH spend | 2013/14 PB/PSS/PH spend | 2013/14 PB/PSS/PH spend |
|                                                   | SYLLR 2013/14/15           | SYLLR 2013/14/15        | SYLLR 2013/14/15        | SYLLR 2013/14/15        |
|                                                   | outcome model              | outcome model           | outcome model           | outcome model           |
|                                                   | instrument PB/GSS/PH       | instrument PB/GSS/PH    | instrument PB/GSS/PH    | instrument PB/GSS/PH    |
|                                                   | spend                      | spend                   | spend                   | spend                   |
|                                                   | weighted                   | weighted                | weighted                | weighted                |
|                                                   | IV second stage            | IV second stage         | IV second stage         | IV second stage         |
|                                                   | parsimonious specification | specification_2         | specification_3         | specification_4         |
| VARIABLES                                         | 11 instruments             | 7 instruments           | 5 instruments           | 4 instruments           |
| Public health expenditure per person              | -0.051<br>[0.039]          | -0.043<br>[0.047]       | -0.060<br>[0.044]       | -0.099**<br>[0.045]     |
| CCG (PB) healthcare spend per person              | -0.862***<br>[0.223]       | -0.461<br>[0.313]       | -0.637*<br>[0.369]      | -0.693**<br>[0.333]     |
| Social service (GSS) spend per person             | -0.206<br>[0.133]          | -0.469***<br>[0.161]    | -0.370*<br>[0.205]      | -0.471**<br>[0.237]     |
| % population aged 16-74 that are permanently sick | 0.649***<br>[0.046]        | 0.651***<br>[0.054]     | 0.672***<br>[0.052]     | 0.528***<br>[0.073]     |
| % population providing unpaid care                | -0.381***<br>[0.086]       | -0.388***<br>[0.096]    | -0.400***<br>[0.097]    | -0.143<br>[0.118]       |
| % population in white ethnic group                | 0.163***<br>[0.042]        | 0.195***<br>[0.043]     | 0.180***<br>[0.046]     | 0.299***<br>[0.078]     |
| Older adult: social service need per person       |                            |                         |                         | 0.416***<br>[0.143]     |
| Constant                                          | 13.352***<br>[1.733]       | 10.204***<br>[2.389]    | 11.655***<br>[2.873]    | 12.245***<br>[2.546]    |
| Observations                                      | 150                        | 150                     | 150                     | 150                     |
| Endogeneity test statistic                        | 10.644                     | 17.686                  | 21.100                  | 23.214                  |
| Endogeneity p-value                               | 0.014                      | 0.001                   | 0.000                   | 0.000                   |
| Hansen-Sargan test statistic                      | 25.690                     | 10.432                  | 2.173                   | 0.080                   |
| Hansen-Sargan p-value                             | 0.001                      | 0.034                   | 0.337                   | 0.778                   |
| Pesaran-Taylor reset statistic                    | 0.052                      | 0.372                   | 0.080                   | 0.001                   |
| Pesaran-Taylor p-value                            | 0.820                      | 0.542                   | 0.777                   | 0.972                   |
| SW_PB F-statistic                                 | 5.977                      | 6.833                   | 7.878                   | 13.534                  |
| SW_PB p-value                                     | 0.000                      | 0.000                   | 0.000                   | 0.000                   |
| SW_GSS F-statistic                                | 4.939                      | 5.521                   | 6.135                   | 9.722                   |
| SW_GSS p-value                                    | 0.000                      | 0.000                   | 0.001                   | 0.000                   |
| SW_PH F-statistic                                 | 18.451                     | 22.092                  | 30.944                  | 46.946                  |



| SW | PH | p-value | 0.000 | 0.000 | 0.000 | 0.000 |
|----|----|---------|-------|-------|-------|-------|
|----|----|---------|-------|-------|-------|-------|

Robust standard errors in brackets  
\*\*\* p<0.01, \*\* p<0.05, \* p<0.1

1  
2  
3  
4  
5  
6  
7  
8  
9  
10  
11  
12  
13  
14  
15  
16  
17  
18  
19  
20  
21  
22  
23  
24  
25  
26  
27  
28  
29  
30  
31  
32  
33  
34  
35  
36  
37  
38  
39  
40  
41  
42  
43  
44  
45  
46

For peer review only

**Table 4 Results summary**

| Type of health-related expenditure                            | Health outcome elasticity      |                                | Spending gap<br>per capita between<br>2001/02- 2009/10 and<br>2010/11-2014/15 | Deaths attributable to spending gap<br>(=annual deaths*elasticity*gap) |                            | Deaths attributable<br>to spending gap<br>from time<br>trend analysis <sup>7</sup> |
|---------------------------------------------------------------|--------------------------------|--------------------------------|-------------------------------------------------------------------------------|------------------------------------------------------------------------|----------------------------|------------------------------------------------------------------------------------|
|                                                               | Backward<br>Selection          | Forward<br>Selection           |                                                                               | Backward<br>Selection                                                  | Forward<br>Selection       |                                                                                    |
|                                                               | column 1                       | column 2                       | column 3                                                                      | column 4                                                               | column 5                   | column 6                                                                           |
| Social care expenditure<br>[95% confidence interval]          | -0.336<br>[-0.031, -<br>0.640] | -0.471<br>[0.003, -<br>0.945]  | 15.08%                                                                        | 23,662<br>[2,183, 45,071]                                              | 33,170<br>[-211, 66,550]   | n/a                                                                                |
| Healthcare expenditure<br>[95% confidence interval]           | -0.532<br>[-0.014, -<br>1.050] | -0.693<br>[-0.027, -<br>1.359] | 13.64%                                                                        | 33,888<br>[892, 66,884]                                                | 44,143<br>[1,720, 86,567]  | n/a                                                                                |
| Total social care and healthcare<br>[95% confidence interval] | n/a                            | n/a                            | n/a                                                                           | 57,550<br>[3,075, 111,955]                                             | 77,313<br>[1,509, 153,117] | 45,368<br>[34,530, 56,206]                                                         |

1  
2  
3  
4  
5  
6  
7  
8  
9  
10  
11  
12  
13  
14  
15  
16  
17  
18  
19  
20  
21  
22  
23  
24  
25  
26  
27  
28  
29  
30  
31  
32  
33  
34  
35  
36  
37  
38  
39  
40  
41  
42  
43  
44  
45  
46

Figure 1 Illustration of the reverse causation issue and its resolution

For peer review only

Figure 1 Illustration of the reverse causation issue and its resolution

Part (a)

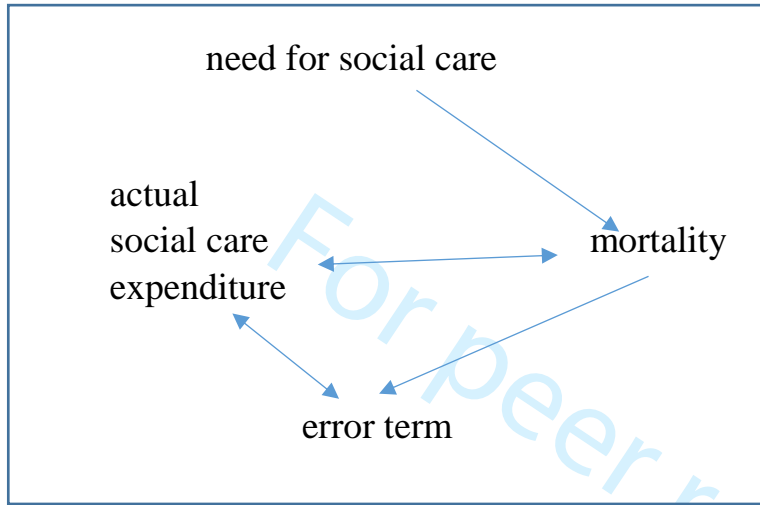

Part (b)

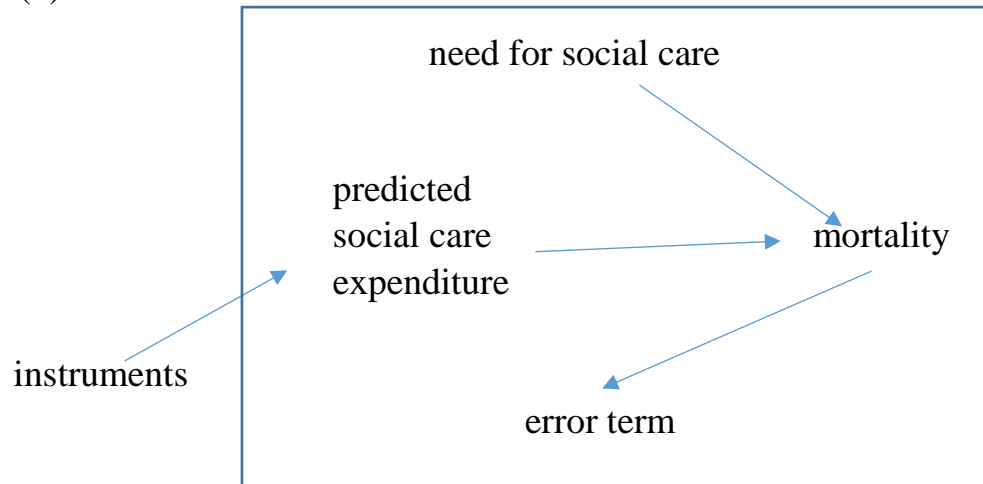

# The mortality effects of social care, public health and healthcare expenditure: cross-sectional evidence from England for 2013/14

## Appendices

### Appendix A1: Further details about the instruments for healthcare expenditure

For 2013/14 the Department of Health allocated each Clinical Commissioning Group (CCG) a fixed proportion of the national budget (£65bn). CCGs used this allocation to fund expenditure on most types of healthcare except primary care, specialised commissioning and public health. CCGs reported their actual expenditure across various programmes of care and this data can be found in the programme budgeting dataset. This is available from <https://www.england.nhs.uk/prog-budgeting/> [accessed 05 September 2020].

Healthcare expenditure is instrumented in a similar way to social care expenditure and in line with equation (2) in the main text. The selection of the relevant funding rule variables for healthcare expenditure for 2013/14 is more difficult than usual due to the changes enacted by the Health and Social Care Act 2012. Normally, resource allocation formulae are updated annually but the approaching replacement of Primary Care Trusts (one set of local health authorities) with CCGs (a different set with different responsibilities) led to the freezing of the weighted capitation formula for 2012/13, with all Primary Care Trusts (PCTs) receiving the same (3%) growth rate over their 2011/12 allocations. Because CCGs were not responsible for the same set of services as PCTs (CCGs lost responsibility for primary care public health, specialised services, and primary care), there was a baseline exercise in 2012 that identified actual PCT expenditure on CCG service responsibilities and, for 2013/14, each CCG enjoyed an uplift of 2.3% on these 2012/13 baselines.

As a result of these changes, the most appropriate funding rule variables for CCG healthcare expenditure in 2013/14 are drawn from the 2011/12 allocations for PCTs, appropriately converted to the new (CCG) geography. These allocations reflect components of the funding formulae (one for the total allocation, one for Hospital and Community Health Services (HCHS), and one for prescribing), and we select three funding rule variables employed in these formulae which we believe are uncorrelated with mortality. More precisely, the funding rule variables for CCG

1  
2 healthcare expenditure for 2013/14 are: (i) the age index from the prescribing component of the  
3 total allocation; (ii) the MFF for the HCHS component of the total allocation; and (iii) the DFT for  
4 the total allocation to PCTs for 2011/12.  
5  
6  
7

8  
9 If the additional funding for areas with high unit costs exactly compensates for these additional  
10 costs then this additional nominal spending will not improve health outcomes because there is no  
11 increase in real spending. We assume that this adjustment for higher costs is not perfect and that  
12 some CCGs receive too much compensation and that others receive too little but that the  
13 imprecision associated with this adjustment is small relative to the size of the adjustment. This  
14 imperfect adjustment for local conditions provides the link between this instrument, expenditure  
15 and mortality. The same argument applies to the use of the age index as an instrument for  
16 healthcare expenditure.  
17  
18  
19  
20  
21  
22  
23  
24  
25

## 26 **Appendix A2: Further details about the instruments for local public health expenditure**

27

28  
29 The resource allocation formula used to distribute the total public health budget to local authorities  
30 has three components. These are for substance misuse services, for non-mandatory services, and  
31 for mandatory services. Each of these three service areas has its own resource allocation formula  
32 but each formula has a similar structure to that outlined in equation (2) in the main text and two of  
33 the four variables in equation (2) (the MFF and the DFT) are present for all three components.  
34 Hence we use these variables as instruments for public health expenditure.  
35  
36  
37  
38  
39  
40

41 As noted in the main text, the DFT index reflects how far an authority's actual budget is from its  
42 target allocation. This difference will reflect the product of three factors for the public health DFT  
43 index: (i) the size of PCT expenditure in 2010/11 on those public health activities that were  
44 transferred to local authorities in 2013/14; (ii) the public health grant funding formula for 2013/14;  
45 and (iii) the 'pace of change' policy for the 2013/14 public health allocations. Clearly, the last two  
46 elements will be policy choices but it is not obvious that the resulting DFT will be endogenous with  
47 respect to mortality and hence we feel justified in using the DFT index as an instrument for public  
48 health expenditure. And, of course, the validity of this instrument is empirically tested using the  
49 Hansen-Sargan test.  
50  
51  
52  
53  
54  
55  
56  
57  
58  
59  
60

1  
2 **Appendix A3**  
3  
4

5 This appendix contains the first-stage regressions associated with the second-stage results reported  
6 in the main body of the text.  
7  
8  
9

10  
11  
12  
13  
14  
15  
16  
17  
18  
19  
20  
21  
22  
23  
24  
25  
26  
27  
28  
29  
30  
31  
32  
33  
34  
35  
36  
37  
38  
39  
40  
41  
42  
43  
44  
45  
46  
47  
48  
49  
50  
51  
52  
53  
54  
55  
56  
57  
58  
59  
60

For peer review only

Table A1 Obtaining a preferred health outcome specification for social care, healthcare and public health expenditure, backward selection, first-stage results

|                                                  | (1)                        | (2)                        | (3)                        | (4)                 | (5)                  | (6)                  | (7)                  | (8)                  | (9)                  |
|--------------------------------------------------|----------------------------|----------------------------|----------------------------|---------------------|----------------------|----------------------|----------------------|----------------------|----------------------|
|                                                  | All causes                 | All causes                 | All causes                 | All causes          | All causes           | All causes           | All causes           | All causes           | All causes           |
|                                                  | 2013/14 PB spend           | 2013/14 G_SS spend         | 2013/14 PH spend           | 2013/14 PB spend    | 2013/14 G_SS spend   | 2013/14 PH spend     | 2013/14 PB spend     | 2013/14 G_SS spend   | 2013/14 PH spend     |
|                                                  | SYLLR 2013/14/15           | SYLLR 2013/14/15           | SYLLR 2013/14/15           | SYLLR 2013/14/15    | SYLLR 2013/14/15     | SYLLR 2013/14/15     | SYLLR 2013/14/15     | SYLLR 2013/14/15     | SYLLR 2013/14/15     |
|                                                  | outcome model              | outcome model              | outcome model              | outcome model       | outcome model        | outcome model        | outcome model        | outcome model        | outcome model        |
|                                                  | first-stage                | first-stage                | first-stage                | first-stage         | first-stage          | first-stage          | first-stage          | first-stage          | first-stage          |
|                                                  | weighted                   | weighted                   | weighted                   | weighted            | weighted             | weighted             | weighted             | weighted             | weighted             |
|                                                  | OLS                        | OLS                        | OLS                        | OLS                 | OLS                  | OLS                  | OLS                  | OLS                  | OLS                  |
|                                                  | parsimonious specification | parsimonious specification | parsimonious specification | parsimonious_v2     | parsimonious_v2      | parsimonious_v2      | parsimonious_v3      | parsimonious_v3      | parsimonious_v3      |
| VARIABLES                                        |                            |                            |                            |                     |                      |                      |                      |                      |                      |
| DFT index, public health expenditure, 2013/14    | 0.011<br>[0.027]           | 0.054<br>[0.061]           | 0.737***<br>[0.050]        | 0.022<br>[0.026]    | 0.033<br>[0.067]     | 0.736***<br>[0.045]  | 0.021<br>[0.026]     | 0.039<br>[0.064]     | 0.755***<br>[0.054]  |
| MFF, public health expenditure, 2013/14          | 0.099<br>[0.438]           | 1.033<br>[1.010]           | 0.945<br>[1.016]           |                     |                      |                      |                      |                      |                      |
| DFT index, NHS healthcare expenditure            | 0.537***<br>[0.155]        | 0.012<br>[0.359]           | 0.590**<br>[0.276]         | 0.536***<br>[0.151] | 0.009<br>[0.380]     | 0.587**<br>[0.279]   | 0.541***<br>[0.158]  | 0.045<br>[0.391]     | 0.633*<br>[0.326]    |
| Age index, prescribing cost formula              | 0.234***<br>[0.084]        | 0.230<br>[0.197]           | -1.080***<br>[0.270]       | 0.226***<br>[0.084] | 0.179<br>[0.201]     | -1.129***<br>[0.276] | 0.250***<br>[0.076]  | 0.077<br>[0.208]     | -1.423***<br>[0.262] |
| MFF, resource allocation HCHS formula            | -0.425<br>[0.488]          | -1.459<br>[1.093]          | -1.619<br>[1.203]          |                     |                      |                      |                      |                      |                      |
| Type of LA: London borough                       | 0.036<br>[0.024]           | -0.113**<br>[0.054]        | -0.034<br>[0.058]          |                     |                      |                      |                      |                      |                      |
| Type of LA: Metropolitan district                | 0.017<br>[0.017]           | -0.113***<br>[0.030]       | 0.010<br>[0.043]           | 0.017<br>[0.015]    | -0.068**<br>[0.030]  | 0.041<br>[0.038]     | 0.008<br>[0.013]     | -0.056**<br>[0.023]  | 0.030<br>[0.029]     |
| Type of LA: Unitary authority                    | 0.002<br>[0.011]           | -0.025<br>[0.026]          | 0.053<br>[0.032]           | 0.003<br>[0.009]    | 0.004<br>[0.026]     | 0.075***<br>[0.028]  |                      |                      |                      |
| Area cost adj for older people's social services | 0.270<br>[0.281]           | 0.527<br>[0.590]           | 0.444<br>[0.454]           | 0.215<br>[0.182]    | -0.131<br>[0.425]    | -0.051<br>[0.407]    |                      |                      |                      |
| Population sparsity measure                      | 0.820<br>[0.719]           | -4.418*<br>[2.314]         | -8.406***<br>[2.403]       | 1.300**<br>[0.653]  | -3.199<br>[2.360]    | -6.998***<br>[2.250] |                      |                      |                      |
| % households that are owner occupied             | -0.114**<br>[0.055]        | -0.356***<br>[0.107]       | -0.163<br>[0.128]          | -0.107**<br>[0.053] | -0.466***<br>[0.106] | -0.233**<br>[0.117]  | -0.148***<br>[0.051] | -0.377***<br>[0.091] | 0.007<br>[0.099]     |
| Index of Multiple Deprivation 2010               | -0.028<br>[0.051]          | 0.135<br>[0.106]           | 0.218*<br>[0.119]          | -0.007<br>[0.053]   | 0.062<br>[0.103]     | 0.192*<br>[0.102]    | -0.008<br>[0.054]    | 0.041<br>[0.110]     | 0.122<br>[0.113]     |
| % population in white ethnic group               | 0.079*<br>[0.042]          | 0.135*<br>[0.071]          | 0.152*<br>[0.084]          | 0.073*<br>[0.044]   | 0.208***<br>[0.072]  | 0.194**<br>[0.078]   | 0.073*<br>[0.041]    | 0.190***<br>[0.065]  | 0.180*<br>[0.092]    |
| % population providing unpaid care               | -0.101<br>[0.092]          | 0.385*<br>[0.230]          | -0.017<br>[0.205]          | -0.073<br>[0.091]   | 0.429*<br>[0.220]    | 0.048<br>[0.207]     | -0.053<br>[0.093]    | 0.340*<br>[0.194]    | -0.270<br>[0.236]    |
| % population aged 16-74 permanently sick         | 0.039<br>[0.061]           | -0.019<br>[0.116]          | 0.270**<br>[0.111]         | 0.036<br>[0.061]    | 0.007<br>[0.118]     | 0.284**<br>[0.110]   | 0.021<br>[0.059]     | 0.072<br>[0.111]     | 0.481***<br>[0.124]  |
| % aged 16-74 in managerial/prof occupations      | -0.104**<br>[0.045]        | 0.211**<br>[0.094]         | -0.121<br>[0.094]          | -0.097**<br>[0.046] | 0.186*<br>[0.103]    | -0.129<br>[0.092]    | -0.083**<br>[0.038]  | 0.183**<br>[0.090]   | -0.158*<br>[0.093]   |
| Constant                                         | 6.841***<br>[0.294]        | -0.557<br>[0.533]          | 3.800***<br>[0.542]        | 6.844***<br>[0.300] | -0.241<br>[0.551]    | 4.028***<br>[0.555]  | 6.863***<br>[0.300]  | -0.166<br>[0.569]    | 4.191***<br>[0.609]  |
| Observations                                     | 150                        | 150                        | 150                        | 150                 | 150                  | 150                  | 150                  | 150                  | 150                  |
| Robust standard errors in brackets               |                            |                            |                            |                     |                      |                      |                      |                      |                      |
| *** p<0.01, ** p<0.05, * p<0.1                   |                            |                            |                            |                     |                      |                      |                      |                      |                      |



Table A1 continued Obtaining a preferred health outcome specification for social care, healthcare and public health expenditure, backward selection, first-stage results

|                                               | (10)             | (11)               | (12)             | (13)             | (14)               | (15)             |
|-----------------------------------------------|------------------|--------------------|------------------|------------------|--------------------|------------------|
|                                               | All causes       | All causes         | All causes       | All causes       | All causes         | All causes       |
|                                               | 2013/14 PB spend | 2013/14 G_SS spend | 2013/14 PH spend | 2013/14 PB spend | 2013/14 G_SS spend | 2013/14 PH spend |
|                                               | SYLLR 2013/14/15 | SYLLR 2013/14/15   | SYLLR 2013/14/15 | SYLLR 2013/14/15 | SYLLR 2013/14/15   | SYLLR 2013/14/15 |
|                                               | outcome model    | outcome model      | outcome model    | outcome model    | outcome model      | outcome model    |
|                                               | first-stage      | first-stage        | first-stage      | first-stage      | first-stage        | first-stage      |
|                                               | weighted         | weighted           | weighted         | weighted         | weighted           | weighted         |
|                                               | OLS              | OLS                | OLS              | OLS              | OLS                | OLS              |
|                                               | parsimonious_v4  | parsimonious_v4    | parsimonious_v4  | parsimonious_v5  | parsimonious_v5    | parsimonious_v5  |
| VARIABLES                                     |                  |                    |                  |                  |                    |                  |
| DFT index, public health expenditure, 2013/14 | 0.014            | 0.062              | 0.764***         | 0.027            | 0.083              | 0.761***         |
|                                               | [0.027]          | [0.055]            | [0.058]          | [0.026]          | [0.054]            | [0.056]          |
| DFT index, NHS healthcare expenditure         | 0.592***         | -0.136             | 0.566*           | 0.594***         | -0.131             | 0.565*           |
|                                               | [0.158]          | [0.344]            | [0.340]          | [0.161]          | [0.344]            | [0.340]          |
| Age index, prescribing cost formula           | 0.218***         | 0.190              | -1.382***        | 0.227***         | 0.205              | -1.384***        |
|                                               | [0.080]          | [0.217]            | [0.286]          | [0.085]          | [0.226]            | [0.284]          |
| Type of LA: Metropolitan district             | 0.012            | -0.069***          | 0.026            | 0.004            | -0.082***          | 0.027            |
|                                               | [0.013]          | [0.023]            | [0.029]          | [0.013]          | [0.024]            | [0.027]          |
| % households that are owner occupied          | -0.175***        | -0.282***          | 0.042            |                  |                    |                  |
|                                               | [0.051]          | [0.100]            | [0.117]          |                  |                    |                  |
| Index of Multiple Deprivation 2010            | 0.195            | -0.680*            | -0.145           | 0.079            | -0.868**           | -0.117           |
|                                               | [0.171]          | [0.351]            | [0.455]          | [0.154]          | [0.350]            | [0.421]          |
| % population in white ethnic group            | 0.078*           | 0.173**            | 0.173*           | 0.063            | 0.149**            | 0.177*           |
|                                               | [0.040]          | [0.067]            | [0.096]          | [0.040]          | [0.068]            | [0.095]          |
| % population providing unpaid care            | -0.037           | 0.284              | -0.291           | -0.189**         | 0.039              | -0.254           |
|                                               | [0.092]          | [0.205]            | [0.244]          | [0.094]          | [0.207]            | [0.232]          |
| % population aged 16-74 permanently sick      | 0.025            | 0.055              | 0.475***         | 0.056            | 0.104              | 0.467***         |
|                                               | [0.058]          | [0.107]            | [0.124]          | [0.063]          | [0.109]            | [0.124]          |
| % aged 16-74 in managerial/prof occupations   | -0.108***        | 0.273***           | -0.125           | -0.061           | 0.348***           | -0.136           |
|                                               | [0.039]          | [0.096]            | [0.110]          | [0.041]          | [0.083]            | [0.103]          |
| Index of Multiple Deprivation 2010 Squared    | -0.038           | 0.137**            | 0.051            | -0.011           | 0.180***           | 0.044            |
|                                               | [0.028]          | [0.058]            | [0.081]          | [0.025]          | [0.056]            | [0.073]          |
| Constant                                      | 6.615***         | 0.716              | 4.518***         | 6.605***         | 0.700              | 4.520***         |
|                                               | [0.382]          | [0.736]            | [0.815]          | [0.361]          | [0.763]            | [0.811]          |
| Observations                                  | 150              | 150                | 150              | 150              | 150                | 150              |
| Robust standard errors in brackets            |                  |                    |                  |                  |                    |                  |
| *** p<0.01, ** p<0.05, * p<0.1                |                  |                    |                  |                  |                    |                  |

Table A2 Obtaining a preferred health outcome specification for social care, healthcare and public health expenditure, forward selection, first-stage results

|                                                  | (1)                     | (2)                     | (3)                     | (4)              | (5)                | (6)              |
|--------------------------------------------------|-------------------------|-------------------------|-------------------------|------------------|--------------------|------------------|
|                                                  | All causes              | All causes              | All causes              | All causes       | All causes         | All causes       |
|                                                  | 2013/14 PB spend        | 2013/14 G_SS spend      | 2013/14 PH spend        | 2013/14 PB spend | 2013/14 G_SS spend | 2013/14 PH spend |
|                                                  | SYLLR 2013/14/15        | SYLLR 2013/14/15        | SYLLR 2013/14/15        | SYLLR 2013/14/15 | SYLLR 2013/14/15   | SYLLR 2013/14/15 |
|                                                  | outcome model           | outcome model           | outcome model           | outcome model    | outcome model      | outcome model    |
|                                                  | first-stage             | first-stage             | first-stage             | first-stage      | first-stage        | first-stage      |
|                                                  | weighted                | weighted                | weighted                | weighted         | weighted           | weighted         |
|                                                  | OLS                     | OLS                     | OLS                     | OLS              | OLS                | OLS              |
|                                                  | 'initial' specification | 'initial' specification | 'initial' specification | specification 2  | specification 2    | specification 2  |
| VARIABLES                                        |                         |                         |                         |                  |                    |                  |
| DFT index, public health expenditure, 2013/14    | 0.004                   | 0.062                   | 0.716***                | 0.016            | 0.048              | 0.717***         |
|                                                  | [0.029]                 | [0.059]                 | [0.054]                 | [0.027]          | [0.063]            | [0.049]          |
| MFF, public health expenditure, 2013/14          | 0.032                   | 107                     | 0.375                   |                  |                    |                  |
|                                                  | [0.430]                 | [0.988]                 | [1038]                  |                  |                    |                  |
| DFT index, NHS healthcare expenditure            | 0.444***                | 0.215                   | 0.530*                  | 0.460***         | 0.221              | 0.371            |
|                                                  | [0.144]                 | [0.342]                 | [0.286]                 | [0.140]          | [0.348]            | [0.256]          |
| Age index, prescribing cost formula              | 0.228***                | 0.246                   | -1077***                | 0.220***         | 0.176              | -1062***         |
|                                                  | [0.084]                 | [0.199]                 | [0.269]                 | [0.079]          | [0.194]            | [0.270]          |
| MFF, resource allocation HCHS formula            | -0.359                  | -1523                   | -1314                   |                  |                    |                  |
|                                                  | [0.482]                 | [1074]                  | [1213]                  |                  |                    |                  |
| Type of LA: London borough                       | 0.030                   | -0.090*                 | -0.003                  |                  |                    |                  |
|                                                  | [0.026]                 | [0.052]                 | [0.050]                 |                  |                    |                  |
| Type of LA: Metropolitan district                | 0.015                   | -0.105***               | 0.020                   | 0.016            | -0.070**           | 0.063**          |
|                                                  | [0.016]                 | [0.031]                 | [0.041]                 | [0.014]          | [0.028]            | [0.031]          |
| Type of LA: Unitary authority                    | 0.004                   | -0.029                  | 0.060*                  | 0.005            | -0.003             | 0.085***         |
|                                                  | [0.010]                 | [0.026]                 | [0.032]                 | [0.009]          | [0.025]            | [0.026]          |
| Area cost adj for older people's social services | 0.143                   | 0.718                   | 0.076                   |                  |                    |                  |
|                                                  | [0.254]                 | [0.626]                 | [0.460]                 |                  |                    |                  |
| Population sparsity measure                      | 0.843                   | -4.433*                 | -8.279***               | 1319**           | -3.410             | -5.890***        |
|                                                  | [0.720]                 | [2.392]                 | [2.362]                 | [0.666]          | [2.354]            | [2.141]          |
| % households that are owner occupied             | -0.101*                 | -0.403***               | -0.211*                 | -0.102*          | -0.502***          | -0.209*          |
|                                                  | [0.053]                 | [0.107]                 | [0.123]                 | [0.052]          | [0.101]            | [0.121]          |
| % population aged 16-74 permanently sick         | 0.052*                  | 0.026                   | 0.519***                | 0.066***         | -0.014             | 0.567***         |
|                                                  | [0.029]                 | [0.073]                 | [0.067]                 | [0.024]          | [0.066]            | [0.064]          |
| % population providing unpaid care               | -0.086                  | 0.300                   | -0.180                  | -0.074           | 0.394*             | -0.107           |
|                                                  | [0.086]                 | [0.217]                 | [0.196]                 | [0.084]          | [0.215]            | [0.202]          |
| % population in white ethnic group               | 0.050*                  | 0.161**                 | 0.014                   | 0.041            | 0.248***           | 0.048            |
|                                                  | [0.028]                 | [0.062]                 | [0.070]                 | [0.027]          | [0.065]            | [0.060]          |
| Older adults: social service need per person     |                         |                         |                         |                  |                    |                  |
| Constant                                         | 6.962***                | -0.480                  | 4.991***                | 7.038***         | -0.434             | 5.291***         |
|                                                  | [0.158]                 | [0.403]                 | [0.367]                 | [0.150]          | [0.370]            | [0.382]          |
| Observations                                     | 150                     | 150                     | 150                     | 150              | 150                | 150              |
| Robust standard errors in brackets               |                         |                         |                         |                  |                    |                  |
| *** p<0.01, ** p<0.05, * p<0.1                   |                         |                         |                         |                  |                    |                  |

Table A2 continued

Obtaining a preferred health outcome specification for social care, healthcare and public health expenditure, forward selection, first-stage results

| VARIABLES                                     | (7)<br>All causes<br>2013/14 PB spend<br>SYLLR 2013/14/15<br>outcome model<br>first-stage<br>weighted<br>OLS<br>specification 3 | (8)<br>All causes<br>2013/14 G_SS spend<br>SYLLR 2013/14/15<br>outcome model<br>first-stage<br>weighted<br>OLS<br>specification 3 | (9)<br>All causes<br>2013/14 PH spend<br>SYLLR 2013/14/15<br>outcome model<br>first-stage<br>weighted<br>OLS<br>specification 3 | (10)<br>All causes<br>2013/14 PB spend<br>SYLLR 2013/14/15<br>outcome model<br>first-stage<br>weighted<br>OLS<br>preferred specification | (11)<br>All causes<br>2013/14 G_SS spend<br>SYLLR 2013/14/15<br>outcome model<br>first-stage<br>weighted<br>OLS<br>preferred specification | (12)<br>All causes<br>2013/14 PH spend<br>SYLLR 2013/14/15<br>outcome model<br>first-stage<br>weighted<br>OLS<br>referred specification |
|-----------------------------------------------|---------------------------------------------------------------------------------------------------------------------------------|-----------------------------------------------------------------------------------------------------------------------------------|---------------------------------------------------------------------------------------------------------------------------------|------------------------------------------------------------------------------------------------------------------------------------------|--------------------------------------------------------------------------------------------------------------------------------------------|-----------------------------------------------------------------------------------------------------------------------------------------|
| DFT index, public health expenditure, 2013/14 | 0.012<br>[0.026]                                                                                                                | 0.057<br>[0.064]                                                                                                                  | 0.734***<br>[0.057]                                                                                                             | 0.020<br>[0.026]                                                                                                                         | 0.075<br>[0.061]                                                                                                                           | 0.728***<br>[0.056]                                                                                                                     |
| DFT index, NHS healthcare expenditure         | 0.413***<br>[0.132]                                                                                                             | 0.321<br>[0.351]                                                                                                                  | 0.352<br>[0.285]                                                                                                                | 0.451***<br>[0.127]                                                                                                                      | 0.291<br>[0.338]                                                                                                                           | 0.255<br>[0.284]                                                                                                                        |
| Age index, prescribing cost formula           | 0.266***<br>[0.072]                                                                                                             | 0.050<br>[0.210]                                                                                                                  | -1.345***<br>[0.253]                                                                                                            | 0.279***<br>[0.077]                                                                                                                      | 0.212<br>[0.207]                                                                                                                           | -1.279***<br>[0.257]                                                                                                                    |
| Type of LA: Metropolitan district             | 0.009<br>[0.012]                                                                                                                | -0.057**<br>[0.023]                                                                                                               | 0.039<br>[0.027]                                                                                                                | 0.004<br>[0.013]                                                                                                                         | -0.080***<br>[0.023]                                                                                                                       | 0.037<br>[0.026]                                                                                                                        |
| % households that are owner occupied          | -0.129***<br>[0.049]                                                                                                            | -0.422***<br>[0.085]                                                                                                              | 0.026<br>[0.100]                                                                                                                |                                                                                                                                          |                                                                                                                                            |                                                                                                                                         |
| % population aged 16-74 permanently sick      | 0.056**<br>[0.024]                                                                                                              | 0.019<br>[0.045]                                                                                                                  | 0.699***<br>[0.059]                                                                                                             | 0.069**<br>[0.029]                                                                                                                       | -0.088<br>[0.062]                                                                                                                          | 0.610***<br>[0.064]                                                                                                                     |
| % population providing unpaid care            | -0.055<br>[0.088]                                                                                                               | 0.328*<br>[0.191]                                                                                                                 | -0.372<br>[0.227]                                                                                                               | -0.158*<br>[0.085]                                                                                                                       | 0.178<br>[0.191]                                                                                                                           | -0.245<br>[0.212]                                                                                                                       |
| % population in white ethnic group            | 0.048*<br>[0.026]                                                                                                               | 0.235***<br>[0.064]                                                                                                               | 0.064<br>[0.068]                                                                                                                | 0.047*<br>[0.026]                                                                                                                        | 0.294***<br>[0.068]                                                                                                                        | 0.100<br>[0.068]                                                                                                                        |
| Older adults: social service need per person  |                                                                                                                                 |                                                                                                                                   |                                                                                                                                 | 0.068<br>[0.058]                                                                                                                         | 0.583***<br>[0.113]                                                                                                                        | 0.193<br>[0.120]                                                                                                                        |
| Constant                                      | 7.052***<br>[0.154]                                                                                                             | -0.473<br>[0.361]                                                                                                                 | 5.208***<br>[0.421]                                                                                                             | 6.925***<br>[0.152]                                                                                                                      | -0.914**<br>[0.360]                                                                                                                        | 5.218***<br>[0.423]                                                                                                                     |
| Observations                                  | 150                                                                                                                             | 150                                                                                                                               | 150                                                                                                                             | 150                                                                                                                                      | 150                                                                                                                                        | 150                                                                                                                                     |

Robust standard errors in brackets  
\*\*\* p<0.01, \*\* p<0.05, \* p<0.1

STROBE Statement—Checklist of items that should be included in reports of *cross-sectional studies*

|                              | Item No | Recommendation                                                                                                                                                                                    | Page No     |
|------------------------------|---------|---------------------------------------------------------------------------------------------------------------------------------------------------------------------------------------------------|-------------|
| <b>Title and abstract</b>    | 1       | (a) Indicate the study's design with a commonly used term in the title or the abstract                                                                                                            | 1, 4        |
|                              |         | (b) Provide in the abstract an informative and balanced summary of what was done and what was found                                                                                               | 4           |
| <b>Introduction</b>          |         |                                                                                                                                                                                                   |             |
| Background/rationale         | 2       | Explain the scientific background and rationale for the investigation being reported                                                                                                              | 6           |
| Objectives                   | 3       | State specific objectives, including any prespecified hypotheses                                                                                                                                  | 4, 6        |
| <b>Methods</b>               |         |                                                                                                                                                                                                   |             |
| Study design                 | 4       | Present key elements of study design early in the paper                                                                                                                                           | 6-7         |
| Setting                      | 5       | Describe the setting, locations, and relevant dates, including periods of recruitment, exposure, follow-up, and data collection                                                                   | 6-7         |
| Participants                 | 6       | (a) Give the eligibility criteria, and the sources and methods of selection of participants                                                                                                       | 6           |
| Variables                    | 7       | Clearly define all outcomes, exposures, predictors, potential confounders, and effect modifiers. Give diagnostic criteria, if applicable                                                          | 8-13        |
| Data sources/<br>measurement | 8*      | For each variable of interest, give sources of data and details of methods of assessment (measurement). Describe comparability of assessment methods if there is more than one group              | 8-13        |
| Bias                         | 9       | Describe any efforts to address potential sources of bias                                                                                                                                         | 8-12        |
| Study size                   | 10      | Explain how the study size was arrived at                                                                                                                                                         | 12-13       |
| Quantitative variables       | 11      | Explain how quantitative variables were handled in the analyses. If applicable, describe which groupings were chosen and why                                                                      | 8-13        |
| Statistical methods          | 12      | (a) Describe all statistical methods, including those used to control for confounding                                                                                                             | 8-12, Fig 1 |
|                              |         | (b) Describe any methods used to examine subgroups and interactions                                                                                                                               | None        |
|                              |         | (c) Explain how missing data were addressed                                                                                                                                                       | n/a         |
|                              |         | (d) If applicable, describe analytical methods taking account of sampling strategy                                                                                                                |             |
|                              |         | (e) Describe any sensitivity analyses                                                                                                                                                             | n/a         |
| <b>Results</b>               |         |                                                                                                                                                                                                   |             |
| Participants                 | 13*     | (a) Report numbers of individuals at each stage of study—eg numbers potentially eligible, examined for eligibility, confirmed eligible, included in the study, completing follow-up, and analysed | Table 1     |
|                              |         | (b) Give reasons for non-participation at each stage                                                                                                                                              | n/a         |
|                              |         | (c) Consider use of a flow diagram                                                                                                                                                                | n/a         |
| Descriptive data             | 14*     | (a) Give characteristics of study participants (eg demographic, clinical, social) and information on exposures and potential confounders                                                          | Table 1     |
|                              |         | (b) Indicate number of participants with missing data for each variable of interest                                                                                                               | Table 1     |
| Outcome data                 | 15*     | Report numbers of outcome events or summary measures                                                                                                                                              | Table 1     |

1  
2  
3  
4  
5  
6  
7  
8  
9  
10  
11  
12  
13  
14  
15  
16  
17  
18  
19  
20  
21  
22  
23  
24  
25  
26  
27  
28  
29  
30  
31  
32  
33  
34  
35  
36  
37  
38  
39  
40  
41  
42  
43  
44  
45  
46  
47  
48  
49  
50  
51  
52  
53  
54  
55  
56  
57  
58  
59  
60

|                          |    |                                                                                                                                                                                                              |                      |
|--------------------------|----|--------------------------------------------------------------------------------------------------------------------------------------------------------------------------------------------------------------|----------------------|
| Main results             | 16 | (a) Give unadjusted estimates and, if applicable, confounder-adjusted estimates and their precision (eg, 95% confidence interval). Make clear which confounders were adjusted for and why they were included | Tables 2, 3, & 4     |
|                          |    | (b) Report category boundaries when continuous variables were categorized                                                                                                                                    | n/a                  |
|                          |    | (c) If relevant, consider translating estimates of relative risk into absolute risk for a meaningful time period                                                                                             | n/a                  |
| Other analyses           | 17 | Report other analyses done—eg analyses of subgroups and interactions, and sensitivity analyses                                                                                                               | Cf Table 2 & Table 3 |
| <b>Discussion</b>        |    |                                                                                                                                                                                                              |                      |
| Key results              | 18 | Summarise key results with reference to study objectives                                                                                                                                                     | Table 4              |
| Limitations              | 19 | Discuss limitations of the study, taking into account sources of potential bias or imprecision. Discuss both direction and magnitude of any potential bias                                                   | 16-17                |
| Interpretation           | 20 | Give a cautious overall interpretation of results considering objectives, limitations, multiplicity of analyses, results from similar studies, and other relevant evidence                                   | 14-16                |
| Generalisability         | 21 | Discuss the generalisability (external validity) of the study results                                                                                                                                        | 16-17                |
| <b>Other information</b> |    |                                                                                                                                                                                                              |                      |
| Funding                  | 22 | Give the source of funding and the role of the funders for the present study and, if applicable, for the original study on which the present article is based                                                | 2                    |

\*Give information separately for exposed and unexposed groups.

**Note:** An Explanation and Elaboration article discusses each checklist item and gives methodological background and published examples of transparent reporting. The STROBE checklist is best used in conjunction with this article (freely available on the Web sites of PLoS Medicine at <http://www.plosmedicine.org/>, Annals of Internal Medicine at <http://www.annals.org/>, and Epidemiology at <http://www.epidem.com/>). Information on the STROBE Initiative is available at [www.strobe-statement.org](http://www.strobe-statement.org).

# BMJ Open

## The causal impact of social care, public health and healthcare expenditure on mortality in England: cross-sectional evidence for 2013/14

|                                 |                                                                                                                                                                                                                                                                                                                    |
|---------------------------------|--------------------------------------------------------------------------------------------------------------------------------------------------------------------------------------------------------------------------------------------------------------------------------------------------------------------|
| Journal:                        | <i>BMJ Open</i>                                                                                                                                                                                                                                                                                                    |
| Manuscript ID                   | bmjopen-2020-046417.R1                                                                                                                                                                                                                                                                                             |
| Article Type:                   | Original research                                                                                                                                                                                                                                                                                                  |
| Date Submitted by the Author:   | 24-May-2021                                                                                                                                                                                                                                                                                                        |
| Complete List of Authors:       | Martin, Stephen; University of York Department of Economics and Related Studies,<br>Longo, Francesco; University of York, Centre for Health Economics<br>Lomas, James; University of York, Centre for Health Economics<br>Claxton, Karl; University of York, Centre for Health Economics & Department of Economics |
| <b>Primary Subject Heading</b>: | Health economics                                                                                                                                                                                                                                                                                                   |
| Secondary Subject Heading:      | Health policy, Public health                                                                                                                                                                                                                                                                                       |
| Keywords:                       | HEALTH ECONOMICS, Health policy < HEALTH SERVICES ADMINISTRATION & MANAGEMENT, STATISTICS & RESEARCH METHODS                                                                                                                                                                                                       |
|                                 |                                                                                                                                                                                                                                                                                                                    |

SCHOLARONE™  
Manuscripts



I, the Submitting Author has the right to grant and does grant on behalf of all authors of the Work (as defined in the below author licence), an exclusive licence and/or a non-exclusive licence for contributions from authors who are: i) UK Crown employees; ii) where BMJ has agreed a CC-BY licence shall apply, and/or iii) in accordance with the terms applicable for US Federal Government officers or employees acting as part of their official duties; on a worldwide, perpetual, irrevocable, royalty-free basis to BMJ Publishing Group Ltd ("BMJ") its licensees and where the relevant Journal is co-owned by BMJ to the co-owners of the Journal, to publish the Work in this journal and any other BMJ products and to exploit all rights, as set out in our [licence](#).

The Submitting Author accepts and understands that any supply made under these terms is made by BMJ to the Submitting Author unless you are acting as an employee on behalf of your employer or a postgraduate student of an affiliated institution which is paying any applicable article publishing charge ("APC") for Open Access articles. Where the Submitting Author wishes to make the Work available on an Open Access basis (and intends to pay the relevant APC), the terms of reuse of such Open Access shall be governed by a Creative Commons licence – details of these licences and which [Creative Commons](#) licence will apply to this Work are set out in our licence referred to above.

Other than as permitted in any relevant BMJ Author's Self Archiving Policies, I confirm this Work has not been accepted for publication elsewhere, is not being considered for publication elsewhere and does not duplicate material already published. I confirm all authors consent to publication of this Work and authorise the granting of this licence.

1  
2  
3 **The causal impact of social care, public health and healthcare expenditure**  
4 **on mortality in England: cross-sectional evidence for 2013/14**  
5  
6  
7  
8  
9

10 Author/position/address

11 Dr Stephen Martin

12 Research Fellow, Department of Economics, University of York, York, YO10 5DD.  
13  
14

15 Dr Francesco Longo

16 Research Fellow, Centre for Health Economics, University of York, York, YO10 5DD.  
17  
18

19 Dr James Lomas

20 Research Fellow, Centre for Health Economics, University of York, York, YO10 5DD.  
21  
22

23 Dr Karl Claxton

24 Professor, Department of Economics & Centre for Health Economics, University of York,  
25 York, YO10 5DD.  
26  
27  
28

29 Corresponding author and email address

30 Dr Stephen Martin Email: [sdm1@york.ac.uk](mailto:sdm1@york.ac.uk)  
31  
32

33 Copyright statement

34 The Corresponding Author has the right to grant on behalf of all authors and does grant on  
35 behalf of all authors, an exclusive licence (or non-exclusive for government employees) on a  
36 worldwide basis to the BMJ Publishing Group Ltd to permit this article (if accepted) to be  
37 published in BMJ editions and any other BMJ PGL products and sub-licences such use and  
38 exploit all subsidiary rights, as set out in our licence.  
39  
40  
41

42 Transparency declaration

43 The lead author (the manuscript's guarantor) affirms that the manuscript is an honest,  
44 accurate, and transparent account of the study being reported; that no important aspects of the  
45 study have been omitted; and that any discrepancies from the study as planned have been  
46 explained.  
47  
48  
49

50 Details of ethical approval

51 Ethical approval was not required because neither human participants nor animals were  
52 involved in the study.  
53  
54

55 Details of the role of the study sponsors

56 The views expressed in this publication are those of the authors and not necessarily those of  
57 the NHS, the National Institute for Health Research or the Department of Health and Social  
58 Care (DHSC).  
59  
60



#### Statement of independence of researchers from funders

Although funded by the funded by the National Institute for Health Research Policy Research Programme, neither the NIHR nor the DHSC had any influence on the study design, the way in which the research was undertaken, or the results.

#### Acknowledgements

We should like to thank NHS Digital for supplying the mortality data. We should also like to acknowledge the assistance received from various individuals including Michael Chaplin at the Department of Health and Social Care. In addition, we should like to acknowledge the comments received from various individuals at the Department of Health and Social Care and NHS England on an earlier version of this paper. Their suggestions have substantially improved the final version.

#### Word count

The text consists of 5,819 words. There are four tables in this document. There is one figure in a separate file.

# The causal impact of social care, public health and healthcare expenditure on mortality in England: cross-sectional evidence for 2013/14

## Abstract

### *Objectives*

The first objective is to estimate the joint impact of social care, public health and healthcare expenditure on mortality in England. The second objective is to use these results to estimate the impact of spending constraints in 2010/11 – 2014/15 on total mortality.

### *Methods*

The impact of social care, healthcare and public health expenditure on mortality is analysed by applying the two-stage least squares method to local authority data for 2013/14. Next, we compare the growth in healthcare and social care expenditure pre- and post-2010. We use the difference between these growth rates and the responsiveness of mortality to changes in expenditure taken from the 2013/14 cross-sectional analysis to estimate the additional mortality generated by post-2010 spending constraints.

### *Results*

Our most conservative results suggest that: (i) a 1% increase in healthcare expenditure reduces mortality by 0.532%; (ii) a 1% increase in social care expenditure reduces mortality by 0.336%; and (iii) a 1% increase in local public health spending reduces mortality by 0.019%. Using the first two of these elasticities and data on the change in spending growth between 2001/02 - 2009/10 and 2010/11 – 2014/15, we find that there were 57,550 [CI: 3,075-111,955] more deaths in the latter period than would have been observed had spending growth during this period matched that in 2001/02 - 2009/10.

### *Conclusions*

All three forms of public healthcare-related expenditure save lives and there is evidence that additional social care expenditure is more than twice as productive as additional healthcare expenditure. Our results are consistent with the hypothesis that the slowdown in the rate of improvement in life expectancy in England and Wales since 2010 is attributable to spending constraints in the healthcare and social care sectors.

### Strengths and limitations of this study

- Cross-sectional analysis of the causal impact of social care, healthcare and public health expenditure on mortality.
- Two-stage least squares regression allows for the endogenous nature of all three types of expenditure.
- Controls for the need for healthcare-related expenditure are also included.
- We compare the growth in healthcare and social care expenditure pre- and post-2010. We find that there were 57,550 more deaths in the latter period than would have been observed had spending growth during this period matched that in the earlier period.
- The responsiveness of mortality to changes in health-related expenditure in 2013/14 may not hold in other years and there may be other factors affecting mortality beyond those included in this study.

# The causal impact of social care, public health and healthcare expenditure on mortality in England: cross-sectional evidence for 2013/14

## 1. Introduction

The rate of improvement in life expectancy in England and Wales has slowed markedly since 2010.<sup>1 2 3</sup> This decline has been most marked for women aged over 85 years and these people tend to be the most physically frail and/or disadvantaged.<sup>4</sup> It has also been noted that the very elderly tend to be the most dependent on a well-functioning publicly-funded health and social care system.<sup>5</sup> As the slowdown in life expectancy growth has coincided with the imposition of government spending constraints, it has been hypothesised that these constraints are the major cause of the stalled improvement in life expectancy.<sup>6 7</sup>

A recent study assembled annual data on healthcare and social care spending for England from 2001 to 2014 to estimate the impact of the UK government's spending constraints on mortality.<sup>8</sup> Time trend analysis was used to compare the actual mortality rate between 2011 and 2014 with the expected counterfactual rate based on the trend before the imposition of budgetary restrictions in 2010. The study found that spending constraints between 2010 and 2014 were associated with an estimated 45,000 more deaths than would have been expected based on pre-2010 trends.<sup>8</sup>

This finding has generated considerable controversy and merits further investigation. We approach the same issue but from a very different perspective. Instead of extrapolating historic trends at the national level, we use two stage least squares (instrumental variable) regression to estimate the causal relationship between spending and mortality across local authorities at a single point in time (2013/14). Like the time trend study, we consider the impact of both healthcare and social care expenditure on mortality, but we also control for the impact of public health expenditure.

There are few English studies of the impact of healthcare on mortality, and even fewer of the joint impact of healthcare and public health expenditure on mortality.<sup>9 10</sup> The social care literature has concentrated on the impact of expenditure on the quality of life rather than on

1  
2  
3 mortality.<sup>11</sup> Other studies focus on the relationship between the public social care and  
4 healthcare sectors. They find a substitution effect between social and healthcare services so  
5 that an increase in social care services may improve hospital outcomes, for example, by  
6 reducing delayed discharges.<sup>12 13 14 15</sup> However, we are not aware of any English studies of  
7 the joint impact of social care, healthcare, and public health expenditure on mortality, and  
8 hence this study presents the first such estimates. We combine these estimates with  
9 information about the size of the post-2010 spending constraints to provide an alternative  
10 estimate of how many lives such constraints cost between 2011 and 2014.  
11  
12  
13  
14  
15  
16  
17  
18

19 A recent American study looked at the association between healthcare/social service  
20 expenditure and health outcomes across the states for the period 2000-2009.<sup>16</sup> This concluded  
21 that debates about how much should be invested in healthcare should also consider how much  
22 is invested in social services. We build on this work in two ways so that we are able to  
23 provide more precise guidance for English policymakers. First, the American study defined  
24 social service expenditure as comprising public expenditure on all services (such as  
25 education, transportation and public safety) that address the social determinants of health.  
26 Instead we focus on definitions of healthcare and adult social care expenditure as they reflect  
27 the different budgets allocated by central government to different public bodies. Secondly, by  
28 adopting this approach we are also able to estimate the size of the causal impact of this and  
29 other types of healthcare-related expenditure on mortality rather than examining observed  
30 associations. Such causal estimates can start to inform a range of decisions about the scale  
31 and allocation of public expenditure made by public bodies and central government.  
32  
33  
34  
35  
36  
37  
38  
39  
40  
41  
42  
43

44 The plan of this paper is as follows. Section 2 describes the institutional arrangements  
45 associated with the three types of health-related expenditure that are the focus of this study.  
46 Section 3 describes the health outcome equation to be estimated and how we address the  
47 issue of reverse causation (i.e., that mortality may affect expenditure as well as vice versa).  
48 Section 4 describes our estimation approach and section 5 presents brief details of the dataset.  
49 Section 6 presents our results and there is a discussion of them in section 7.  
50  
51  
52  
53  
54  
55  
56

## 57 **2. Institutional arrangements for health-related expenditure in England in 2013/14**

58  
59  
60

### *Social care*

Adults with a physical disability, a learning disability, or a physical or mental illness often have difficulty with routine daily activities such as washing, dressing, cooking, and shopping. Such individuals are usually supported in two main ways: either formally through services that they or their local authority pay for; and/or informally by family, friends, or neighbours.<sup>17</sup>

Funding for local authorities (LAs) comes from three major sources: the local council tax, central government grants, and local business rates. The size of the central government grant will reflect the LA's relative need for expenditure and its income raising capability. LAs have extensive statutory responsibilities in the area of adult social care and they apply national criteria to assess whether people's needs are eligible for LA-funded social care. These national criteria were introduced by the Care Act (2014), and reduced the variation in the eligibility for LA-funded social care between local areas. Before the introduction of the Care Act, local authorities were able to set their own thresholds for the need for social care based on the criteria set out in the Fair Access to Care Services framework.<sup>18</sup> Even if eligible for LA-funded social care, the provision of such funding is means-tested so that, depending on a person's financial situation, they may be asked to contribute to some or all of their social care costs.<sup>17</sup>

Care needs are often multiple and interrelated with other needs. Adult social care is therefore part of a complex system of related public services and forms of support. Since 2010 spending constraints imposed by central government may have had some unfortunate effects on allied public services. For example, there is the long-standing argument that inadequate social care provision may be responsible for the delayed discharge of elderly patients from hospital, and that inadequate care in the community may contribute to the growth in emergency hospital admissions.<sup>19 20</sup> Moreover, inadequate social care provision may be associated with an increase in mortality. Although social care is primarily concerned with improving the quality of life, it is perfectly plausible that social care extends life and that those with care needs enjoy both a lower mortality rate and a better quality of life in those LAs with more generous social care provision.

### *Public health*

1  
2  
3 Consideration of social care expenditure in isolation is slightly problematic because, since  
4 April 2013, LAs have also been responsible for local public health services. Each ‘unitary’  
5 or upper tier local authority receives a fixed annual budget, ring-fenced for public health  
6 activities.<sup>21</sup> For a few services there may be scope to use either the social care or the public  
7 health budget and so, when studying the impact of social care expenditure, it may be wise to  
8 control for expenditure on local public health services. And of course, public health  
9 expenditure will have a direct effect on mortality. Local public health activities accounted  
10 for over £2,500mn of expenditure in 2013/14 and included services related to substance  
11 misuse (roughly one quarter of expenditure), sexual health (roughly one third of expenditure),  
12 children’s health (about 10%) and tobacco control (about 5%). Expenditure on national  
13 public health programmes is excluded from the analysis because no breakdown of this  
14 expenditure by locality is available.<sup>22</sup>

### 25 *Healthcare in England*

27 English National Health Service (NHS) healthcare expenditure was managed by 212 Clinical  
28 Commissioning Groups (CCGs) in 2013/14.<sup>23</sup> These local health authorities were each  
29 allocated a fixed annual budget and this was determined centrally in a similar manner to how  
30 each LA was assigned its budget for local public health responsibilities. These budgets were  
31 used by CCGs to fund expenditure on various types of care including inpatient, outpatient  
32 and community care, and pharmaceutical prescriptions. It is worth noting that CCGs did not  
33 have responsibility for either primary care or specialised commissioning in the study year  
34 (2013/14). These were administered centrally and expenditure on these items has been  
35 excluded from the study because data are not available by local area.

### 46 **3. Methods: the estimating equation and the selection of instruments for expenditure**

#### 50 *The estimated health outcome equation*

51 We adapt the usual health outcome equation to estimate the joint impact of social care, public  
52 health and healthcare expenditure on mortality across English local authorities in 2013/14.

53 We estimate:

$$54 \text{mortality rate}_i = f [\text{healthcare expenditure}_i, \text{public health expenditure}_i, \\ 55 \text{social care expenditure}_i] + \text{controls for need}_i + e_i \quad (1)$$

1  
2  
3  
4  
5 The control variables reflect the need for health-related expenditure in authority  $i$ , and  $e$   
6 reflects everything not included elsewhere in the specification.<sup>9</sup> Quantifying the impact of  
7 these categories of expenditure on mortality is challenging for two reasons: first, there might  
8 be some reverse causation with historical outcomes (eg mortality) influencing the current  
9 level of budget/expenditure; and second, there might be some unobserved factor that is  
10 driving both expenditure and mortality.  
11  
12  
13  
14  
15

16  
17 As an illustration of the reverse causation issue consider figure 1. The box defines the  
18 structural model in which the mortality rate depends on social care expenditure and controls  
19 for need (we have omitted healthcare and public health expenditure from the figure for  
20 simplicity but the same illustration could also be used for these two other types of health-  
21 related expenditure). In Figure 1a, social care expenditure both affects mortality and is  
22 affected by (historical) mortality. This reverse causation links expenditure and the error term,  
23 and this makes the ordinary least squares (OLS) estimator both biased and inconsistent.  
24  
25  
26  
27  
28  
29

30  
31 Insert Figure 1 near here  
32

33  
34 The solution to this problem is to find variables (known as ‘instruments’) that are good  
35 predictors of expenditure but which have no direct impact on mortality and are unaffected by  
36 unobserved factors. These instruments lie outside the box in figure 1b because they do not  
37 belong in the structural model. They are used in a regression model to predict the level of  
38 expenditure that is not influenced by either historical mortality or unobserved factors (this is  
39 the first stage of the two-stage least squares approach). Having severed the link with  
40 unobserved factors and mortality, the predicted level of expenditure is then used in another  
41 regression model to examine the causal impact of (predicted) expenditure on mortality (this is  
42 the second stage of the two-stage least squares approach (2SLS)).  
43  
44  
45  
46  
47  
48  
49

50  
51 A recent study of the impact of healthcare expenditure suggested using components of the  
52 formulae used to distribute funding across health authorities as instruments for healthcare  
53 expenditure.<sup>24</sup> We apply this approach to identification here because the distribution of  
54 funding for all three types of health-related expenditure is informed by various centrally  
55 determined resource allocation formulae.  
56  
57  
58  
59  
60



### *Instruments for social care expenditure*

In the study year (2013/14) each LA received a grant from central government that reflected its relative need for expenditure on a variety of services for which it was responsible. Each service area had its own relative needs formula (RNF) that contributed to its overall relative need, but LAs were free to decide how much to spend in each service area (subject to meeting their statutory obligations). Adult social care had two relative needs formulae: one for people aged 18-64, and another for those aged over 65. The relative needs formula for the older people's social care included a basic amount per client with top-ups for age, deprivation, low income, population sparsity and local input prices.<sup>25</sup> As any instrument should be well correlated with expenditure but not directly correlated with mortality, we use the sparsity and input price adjustment variables from the older person's relative needs formula as instruments for (predictors of) social care expenditure.

A study of the impact of LA expenditure on home care services approached the instrument issue from a different perspective.<sup>26</sup> It claimed that social care expenditure will reflect the service eligibility policy employed by different LAs and that 'the innate culture and perspective of the council... will drive the generosity of policies more than small differences in the health of the population'. The researchers proposed the use of a set of four dummy variables reflecting the type of LA (Shire, Unitary, Metropolitan, London) as instruments on the assumption that 'similar' LAs will have 'similar' eligibility policies and expenditure levels.<sup>26</sup>

Finally, we note that LA-funded social care is means tested and, for example, owner occupiers who go into care homes are expected to sell their home to fund their care but that those in rented accommodation have their care costs paid for by the LA. This suggests that the proportion of households that are owner occupied in an area may serve as an instrument for LA social care expenditure (given appropriate controls for health-related need).

Together, the funding rule, the type of LA, and the owner-occupied household variables provide seven potential instruments for social care expenditure.

### *Instruments for healthcare expenditure*

For our study year (2013/14), each local health authority (212 CCGs) was assigned a fixed share of the national budget (£65bn) by the Department of Health within which they were

1  
2  
3 supposed to meet expenditure on most types of healthcare except primary care, specialised  
4 commissioning and public health. With a little simplification, the budget available to each  
5 CCG can be expressed as  
6  
7

$$\begin{aligned}
 &\text{local CCG budget per person} = (\text{national budget per person}) \times \\
 &\quad (\text{local age index}) \times \\
 &\quad (\text{local additional needs index}) \times \\
 &\quad (\text{local input price index}) \times \\
 &\quad (\text{local DFT Index}) \qquad \qquad \qquad (2)
 \end{aligned}$$

18  
19  
20 where: (i) the age index reflects the demographic profile of the local population; (ii) the  
21 additional needs index reflects local deprivation and other factors likely to influence the need  
22 for health care and includes a measure of historical mortality; (iii) the input price index (the  
23 Market Forces Factor (MFF)) reflects prices in the local health economy; and (iv) the  
24 distance from target (DFT) index reflects how far each health authority's actual budget  
25 allocation is from its target allocation.<sup>24</sup>  
26  
27  
28  
29  
30

31  
32 Because the additional needs index contains historical mortality, it is clear that reverse  
33 causality is an issue and that this (additional needs) index cannot constitute a plausible  
34 instrument for expenditure. However, the other indices provide suitable instruments for CCG  
35 expenditure. Further details about these instruments are in appendix A1 but, in summary,  
36 these funding rule variables are: (i) the DFT index for the total allocation; (ii) the Market  
37 Forces Factor for the Hospital and Community Health Services (HCHS) component of the  
38 total allocation; and (iii) the age index from the cost of prescribing pharmaceuticals  
39 component of the total allocation.  
40  
41  
42  
43  
44  
45  
46  
47

#### 48 *Instruments for public health expenditure*

49 We instrument the public health expenditure variable using a similar approach to both  
50 healthcare and social care expenditure. The resource allocation formula for the public health  
51 grant to local authorities has a similar structure to the CCG grant (as outlined in equation (2))  
52 and we use two of the four local adjustment factors for the public health grant (the MFF and  
53 the DFT) as instruments for public health expenditure. Further details about these  
54 instruments are in appendix A2.  
55  
56  
57  
58  
59  
60

1  
2  
3 *Are the selected instruments plausible and strong?*  
4

5 For 2SLS to generate consistent estimates of the impact of expenditure on mortality, certain  
6 assumptions have to be met. First, the instruments should be good predictors of the  
7 expenditure variable. The usual test for good ('strong') instruments is that the F statistic  
8 associated with the instrument(s) in the first-stage regression should be about 10 or better,  
9 and hence we report the Sanderson-Windmeijer F test statistic for all first-stage estimations.<sup>27</sup>  
10 The second assumption is that any instrument for expenditure has no direct effect on  
11 mortality other than via its effect on expenditure, and that the instrument should be  
12 uncorrelated with unobserved determinants of expenditure and mortality (this is the validity  
13 assumption).  
14  
15  
16  
17  
18  
19  
20  
21

22 Studies that use instrumental variable regression usually contain a discussion about why the  
23 researchers believe that such instruments are likely to be valid. This discussion for the  
24 present study can be found in appendix A3. In addition, the instrument validity assumption  
25 can be tested empirically and hence, where possible, we report the Hansen-Sargan test  
26 statistic of instrument validity for the second-stage equations.<sup>28</sup>  
27  
28  
29  
30  
31  
32  
33

34 **4. Methods: estimation approach**  
35  
36  
37

38 The estimation of equation (1) is complicated by the fact that theory provides little guidance  
39 as to the identity of the appropriate controls for need. Hence, following previous studies, we  
40 identify a dozen socio-economic variables -- such as the proportion of the population of  
41 working age employed in managerial/professional occupations -- as potential controls for the  
42 need for healthcare/public health/social care expenditure.<sup>9 10</sup>  
43  
44  
45  
46  
47

48 We also have a dozen instruments. There are four 'type of LA' dummy variables, two  
49 variables from the relative need formula for social care, and a measure of the local owner-  
50 occupation rate for social care expenditure. We also have two potential instruments for  
51 public health expenditure (the DFT index and the input price index) from its resource  
52 allocation formula. Finally, we have three potential instruments (the DFT index, the input  
53 price index and the age index) for healthcare expenditure from the resource allocation  
54 formula for healthcare budgets.  
55  
56  
57  
58  
59  
60

1  
2  
3 Ideally, we would like a more parsimonious set of controls (to reduce multi-collinearity  
4 problems) and a more parsimonious set of instruments (to minimise problems with weak  
5 instruments). To achieve these goals, we first estimate a health outcome equation using OLS  
6 with all controls and all three types of expenditure included. The least significant control is  
7 removed from the specification and the equation is re-estimated. This process – of dropping  
8 the least significant regressor and re-estimating – continues until there are only significant  
9 controls remaining (the expenditure variables are forced to be ever-present). Having  
10 identified potentially relevant covariates, these controls are then included in a two-stage least  
11 squares specification and a process similar to backward selection is used to eliminate  
12 problematic (invalid and/or weak) instruments.  
13  
14

15  
16  
17  
18  
19  
20  
21  
22 As a sensitivity analysis we repeat the above analysis but use forward rather than backward  
23 selection to identify a parsimonious set of controls.  
24  
25

26  
27  
28 When estimating regressions, the values for all variables are logged so that regression  
29 coefficients can be interpreted as elasticities (for example, the coefficient on an expenditure  
30 variable reflects the impact on mortality of a 1% change in the value of the expenditure  
31 variable). All observations are weighted by the size of local authority's population.  
32 Estimation is undertaken using the *Stata ivreg2* program.<sup>28</sup> In addition to the weak  
33 instrument and instrument validity tests mentioned above, we also report a test for whether  
34 the expenditure variables are endogenous and a reset test (Pesaran-Taylor) for model mis-  
35 specification.<sup>29</sup>  
36  
37  
38  
39  
40

#### 41 42 43 *Patient and public involvement*

44 Neither patients nor the public were involved in the design, or conduct, or reporting, or  
45 dissemination of our research.  
46  
47  
48  
49  
50

## 51 52 **5. Data**

53  
54  
55 We use the gross current expenditure on adult social services by each local authority in  
56 2013/14 as our measure of social service expenditure.<sup>22</sup> This measure excludes capital  
57 charges and, to avoid any double counting issues, it also excludes income from joint  
58  
59  
60

1  
2  
3 commissioning arrangements and income from the NHS. However, it includes income from  
4 locally determined (and means tested) client contributions towards their LA care package.  
5 This expenditure figure is divided by the LA population size to generate a per capita  
6 expenditure figure. As Table 1 shows, the average spend by LA is £307 per person although  
7 there is considerable variation in expenditure across the country: for example, social service  
8 expenditure ranges from £209 per person in Barnsley to £404 in Camden and £660 in the City  
9 of London.  
10  
11  
12  
13  
14  
15  
16

17 Healthcare expenditure data is available from each CCG's programme budgeting return.<sup>30</sup>  
18 These are converted to a local authority basis using a mapping that translates population  
19 levels in mid-2012 from (parts of) CCGs to LAs. The average LA healthcare spend was  
20 £1,152 per person in 2013/14. Public health expenditure data is available from the local  
21 authority revenue expenditure and financing document for 2013/14.<sup>22</sup> The average public  
22 health spend for this year was £53 per person. Total healthcare expenditure (£65bn) is about  
23 four times the size of social service expenditure (£17bn), and the latter is six times the size of  
24 public health expenditure (£2.5bn).  
25  
26  
27  
28  
29  
30  
31

32 Descriptive statistics for all of the variables employed in the study are in Table 1. The  
33 mortality indicator is the years of life lost per 100,000 people for deaths under age 75. The  
34 mean rate across all LAs is 443 years but this varies considerably, ranging from 268 years (in  
35 the City of London) to 776 years (in Blackpool). There is also considerable variation in the  
36 socio-economic control variables (largely constructed using population census data for 2011).  
37 For example, on average 84% of the population is in the white ethnic group but the average  
38 masks considerable variation, from 29% in Newham (London) to almost 99% in Cumbria, in  
39 Redcar & Cleveland, and in the Isles of Scilly.  
40  
41  
42  
43  
44  
45  
46  
47

48 Finally, descriptive statistics for the instruments for each type of expenditure are at the  
49 bottom of Table 1. Some reveal considerable variation around the country (eg the input price  
50 index for older people's social services) but others do not (eg the impact of population  
51 sparsity on the measure of costs).  
52  
53  
54  
55  
56  
57  
58

## 59 6. Results

60

### *Backward selection*

We begin by estimating an OLS specification that includes all 14 controls for the need for health-related expenditure. Of the 14 controls only six are significant at the 5% level and this result is in column 1 of Table 2. Application of the backward selection process described above reveals a more parsimonious set of controls (column 2). If these are included in an IV specification with all 12 potential instruments, we obtain the result shown in column 3. The statistical tests reported at the foot of Table 2 suggest that the instrument set associated with the column 3 result is both invalid (the Hansen-Sargan test statistic is significant) and weak (only one of the Sanderson-Windmeijer test statistics (for public health expenditure) is about ten or better). The three first-stage equations used to predict healthcare, social care and public health expenditure are in columns 1 to 3 respectively of Table A1 in appendix A4.

In an attempt to identify which of the instruments are invalid (and hence should not be used), we re-estimated the specification shown in column 3 of table 2 adding one instrument at a time to the set of second-stage controls. This process suggests that three instruments (the two MFF indices and the London local authority dummy) are invalid and re-estimation without these yields the result shown in column 4 of table 2. As expected, the Hansen-Sargan test statistic has improved considerably but there is still a weak instrument issue for social service expenditure (the Sanderson-Windmeijer F-statistic is only 4.875). The equation used to predict social service expenditure is in column 5 of table A1 in appendix A4 and this has three insignificant instruments (the unitary authority dummy, the area cost adjustment variable and the sparsity measure). If we re-estimate without these instruments we obtain the second-stage result shown in column 5 of table 2. The Sanderson-Windmeijer test statistics improve but the Pesaran-Taylor reset test statistic suggests that there is some misspecification. The addition of the squared value of the IMD 2010 resolves reset test issue and generates the result shown in column 6.

Finally, the Sanderson-Windmeijer test statistic for the instruments for social care expenditure moves above the 'rule of thumb' critical value of ten if the least significant instrument for this variable (the proportion of households that are owner occupied households) is deleted from the specification. This result is in column 7 of table 2 (the corresponding first-stage results are in columns 13 to 15 of table A1 in appendix A4).

### *Forward selection*

The use of forward selection to identify relevant control variables reveals a similar but slightly different set of control variables to those from the backward selection process. If this different set of controls is included in an IV specification with all potential instruments then we obtain the result shown in column 1 of Table 3 (the corresponding first-stage results are in columns 1-3 of Table A2 in appendix A4). This has three covariates all of which are statistically significant with negative coefficients on the three expenditure variables. The problem with this specification is that the instrument set is not valid but if we drop the four most problematic instruments and re-estimate, we obtain the result in column 2 of Table 3 (see columns 4-6 of Table A2 in appendix A4 for the first-stage results). Although the instruments are still invalid at the 5% level (Hansen-Sargan test statistic), there has been considerable improvement. However, the loss of these four instruments has not overcome the weakness issue associated with the instruments for healthcare and social service expenditure (the Sanderson-Windmeijer F-statistics are well below ten).

If we drop the two least significant instruments we get the result in column 3 of table 3. The instrument set now shows no evidence of invalidity but there is still some evidence of weakness. We have no further instruments to add but, if we check to see whether any of the currently omitted covariates belong in the specification, we find that the addition of the measure of ‘older person need for social service care’ has a significant positive coefficient (result not shown). The inclusion of this variable generates an insignificant coefficient on the ‘owner occupied’ instrument for social service expenditure and, if we re-estimate without this, we obtain the result shown in column 4 of table 3. In this specification the expenditure variables are endogenous, the instrument set is valid, and the instruments for each expenditure variable demonstrate no evidence of weakness. There is also no evidence of mis-specification.

### *Application of estimated elasticities to spending constraints*

In a recent paper annual data on healthcare and social care spending for England from 2001 to 2014 was used to estimate the impact of the UK government’s austerity programme on mortality.<sup>8</sup> Time trend analysis was used to compare actual mortality rates in 2011-2014 with the counterfactual rates expected based on trends before the imposition of austerity. These authors found that spending constraints between 2010 and 2014 were associated with 45,368 more deaths than would have been expected based on pre-2010 trends.

1  
2  
3  
4  
5 We can use the outcome elasticities reported above to present some alternative but  
6 comparable estimates and these are summarised in table 4. The public health elasticities are  
7 not included in the excess deaths calculations because time series data for public health  
8 expenditure is not available before 2013/14 and this is probably why the time trend analysis  
9 did not consider the impact of public health expenditure.<sup>8</sup> We have included this variable in  
10 the mortality outcome equations estimated here because our study year (2013/14) is the first  
11 year for which public health expenditure data is reported and its omission may bias the  
12 estimated coefficients on the other two healthcare-related types of expenditure. Moreover, a  
13 recent paper suggests that public health expenditure has a significant effect on mortality.<sup>10</sup>  
14  
15  
16  
17  
18  
19  
20  
21

22 The outcome elasticities associated with healthcare and social care expenditure are in column  
23 1 (backward selection) and column 2 (forward selection) of table 4. The time trend study  
24 reports that real social care spending per capita increased by 2.20% between 2001/02 and  
25 2009/10 but decreased by 1.57% between 2010/11 and 2014/15. If this annual difference  
26 (3.77%) is applied to each of the latter four years then the total spending gap is 15.08%  
27 (column 3). In 2012 there were 467,000 deaths in England. The more conservative of the  
28 two social care elasticity estimates suggests that a 1% increase in spend would save 1,569  
29 lives (=0.336% of 467,000). Hence the 'loss' of 15.08% of social care expenditure over the  
30 period 2010/11 to 2014/15 is associated with 23,662 excess deaths.  
31  
32  
33  
34  
35  
36  
37  
38

39 A similar calculation can be undertaken for healthcare expenditure. The time trend study  
40 reports that real healthcare spending per capita increased by 3.82% between 2001/02 and  
41 2009/10 but by 0.41% between 2010/11 and 2014/15. If this annual difference (3.41%) is  
42 applied to each of the latter four years then the total spending gap attributable to austerity is  
43 13.64%. Our healthcare elasticity suggests that a 1% increase in spend would save 2,484  
44 lives (=0.532% of 467,000). Hence the 'loss' of 13.64% of healthcare expenditure over the  
45 period 2010/11 to 2014/15 is associated with 33,888 excess deaths.  
46  
47  
48  
49  
50  
51  
52

53 The more conservative of our two sets of results suggest that the constraints on the growth of  
54 healthcare and social care expenditure during this period of 'austerity' have been associated  
55 with 57,550 (=23,662+33,888) more deaths than would have been observed had expenditure  
56 growth followed pre-2010 trends. The less conservative of our two sets of results suggests an  
57  
58  
59  
60



1  
2  
3 even larger number deaths (see column 5 of table 4), and both estimates can be compared  
4 with the results from the time trend study (see column 6 of table 4).<sup>8</sup>  
5  
6  
7

## 8 **7. Discussion**

9

10  
11 Although our study has adopted an entirely different approach to the time trend study it  
12 reveals a broadly similar picture: that ‘austerity’ related reductions in the growth of  
13 healthcare and social care expenditure have been associated with a much larger number of  
14 deaths than would have been expected had pre-austerity expenditure trends continued.  
15  
16  
17  
18

19  
20 Both the healthcare and social care expenditure variables have a significant negative effect on  
21 mortality in both the backward and forward selection specifications, and the public health  
22 effect is also statistically significant in the latter specification. If we focus on the more  
23 conservative estimates (from the backward selection specification) we note that the  
24 coefficient on social care expenditure is -0.336. This suggests that a 1% increase in  
25 expenditure is associated with a 0.336% reduction in mortality. The coefficient on healthcare  
26 expenditure is larger (absolutely) at -0.532 but it should be noted that a 1% boost in the  
27 healthcare budget would cost about four times as much as a 1% boost in social care  
28 expenditure.  
29  
30  
31  
32  
33  
34  
35  
36

37 The coefficient on healthcare expenditure, -0.532 (backward selection) or -0.693 (forward  
38 selection) can be compared with that reported by a recent study that undertook a similar  
39 analysis of English data for 2013/14 but which excluded social care expenditure from the  
40 estimating equation. In that study the coefficient on healthcare expenditure was -0.672.<sup>10</sup> The  
41 difference between these estimates is relatively small. Several recent studies from Australia,  
42 England, Spain and Sweden have sought to establish how responsive mortality is to changes  
43 in health care expenditure.<sup>31 32 33 34</sup> These studies have typically omitted other types of health-  
44 related expenditure but our findings suggest that the addition of these other types of  
45 expenditure will have little impact on the responsiveness of mortality to healthcare  
46 expenditure.  
47  
48  
49  
50  
51  
52  
53  
54  
55

56 As social care expenditure is designed primarily to improve recipients’ quality of life, it is  
57 slightly surprising that the coefficient on social care is as large as -0.336, particularly when  
58 the elasticity associated with healthcare expenditure is -0.532 (both figures are backward  
59  
60

1  
2  
3 selection estimates). To understand this relatively large mortality response to social care  
4 expenditure we need to distinguish between the *direct* and *indirect* effects of healthcare and  
5 social care expenditure. Healthcare expenditure has a primarily *direct* effect on mortality;  
6 we would expect areas with better healthcare provision to have lower mortality rates because  
7 more expenditure will buy more medical staff and facilities, and these inputs are directly  
8 responsible for life saving healthcare.  
9  
10  
11  
12  
13  
14

15 Social care on the other hand may generate both *direct* and *indirect* effects on mortality, and  
16 the relative size of each effect is unclear. There will be a direct effect via the prevention of  
17 life-threatening conditions (for example, better social care provision might mean that  
18 vulnerable people are less likely to have life-threatening falls), but there will also be an  
19 indirect effect where better social care facilitates access by others to healthcare services. For  
20 example, if a patient cannot be discharged from hospital due to a lack of social care provision  
21 (eg due to a lack of care in the community or residential home beds), their hospital bed  
22 cannot be used by others who might benefit from it. In this way the indirect effect of social  
23 care facilitates lower mortality, not for those receiving the social care, but for those who are  
24 able to access healthcare sooner than they would otherwise have done.  
25  
26  
27  
28  
29  
30  
31  
32  
33

### 34 *Study limitations*

35 This study is constrained by the availability of mortality data and health-related expenditure  
36 data, and the implementation of central government funding formulae with exogenous  
37 elements for all three types of expenditure. Our study year (2013/14) is the first year for  
38 which there were resource allocation formulae for both health care and public health  
39 expenditure, and a relative needs formula informed the allocation of central government  
40 funding to LAs for social care. As a result, estimation of a panel data specification is not  
41 permitted by the data and the estimated elasticities for 2013/14 may not hold in other years.  
42  
43  
44  
45  
46  
47  
48  
49

50 The estimated mortality equation contains no dynamics and implicitly assumes that all health  
51 benefits occur contemporaneously with expenditure. However, as our health outcome  
52 measure reflects mortality in both the same year as expenditure and also in the two  
53 subsequent years, we do capture some of the lagged effect. Nevertheless, we readily  
54 acknowledge that some health benefits associated with current expenditure may occur many  
55 years later. At the same time, however, we also acknowledge that current mortality may  
56 reflect health-related expenditure from many years ago. Our implicit assumption is that these  
57  
58  
59  
60

1  
2  
3 two effects broadly cancel out each other so that, by relating current expenditure to current  
4 outcomes, we obtain a reasonable estimate of the total effect of expenditure on mortality.  
5  
6  
7

8 We should also note that primary care and specialised commissioning are not included in the  
9 measure of healthcare expenditure used here. This is because responsibility for these types of  
10 expenditure returned to central administrators in April 2013 following the reforms associated  
11 with the Health and Social Care Act 2012. Therefore if, for example, the centralisation of  
12 specialist commissioning led to the unequal provision of such services across the country, this  
13 could have an unaccounted-for effect on the relationship between local spending and  
14 mortality. Related to this, there is also the possibility that we have omitted a relevant  
15 confounder (eg one that affects both mortality and expenditure) from our regression  
16 specifications and such an omission may affect the size of the mortality response to  
17 expenditure.  
18  
19  
20  
21  
22  
23  
24  
25  
26  
27  
28

## 29 **8. Concluding remarks**

30  
31  
32 Our results – using an entirely different estimation approach – have confirmed the results  
33 reported previously: that the restrictions on the growth in health and social care expenditure  
34 during ‘austerity’ have been associated with tens of thousands more deaths than would have  
35 been observed had pre-austerity expenditure growth been sustained.<sup>8</sup>  
36  
37  
38  
39  
40

41 While previous studies have found that healthcare and public health expenditure have a  
42 significant negative effect on mortality, this study makes a major contribution by additionally  
43 estimating the effect of social care expenditure. There is evidence that all three types of  
44 health-related expenditure have a significant negative effect on mortality. There is also  
45 evidence that additional social care expenditure is more than twice as productive as additional  
46 healthcare expenditure, and that the addition of social care expenditure in the health outcome  
47 equation has little effect on the size of the mortality response to changes in healthcare  
48 expenditure.  
49  
50  
51  
52  
53  
54  
55  
56  
57  
58  
59  
60

### Contributorship statement

All (SM, FL, JL and KC) authors contributed to the concept and design of this paper. SM led on the analysis and drafting, and the final paper was edited and approved by all four authors. The corresponding author attests that all listed authors meet authorship criteria and that no others meeting these criteria have been omitted. SM is the paper's guarantor.

### Competing interest statement

All authors have completed the Unified Competing Interest form (available on request from the corresponding author) and declare: financial support from the National Institute for Health Research Policy Research Programme for the submitted work; no financial relationships with any organisations that might have an interest in the submitted work in the previous three years; and no other relationships or activities that could appear to have influenced the submitted work.

### Details of funding

This paper reports independent research funded by the National Institute for Health Research Policy Research Programme (NIHR PRP) through its Policy Research Unit in Economic Evaluation of Health & Care Interventions (EEPRU, grant reference PR-PRU-1217-20401).

### Data sharing statement

All of the raw data are in the public domain. The social care expenditure data is available from the publication 'Local authority revenue expenditure and financing England: 2013 to 2014 individual local authority data – outturn' at <https://www.gov.uk/government/statistics/local-authority-revenue-expenditure-and-financing-england-2013-to-2014-individual-local-authority-data-outturn> [accessed 05 September 2020]. The sparsity and input price adjustment variable from the older person's relative needs formula are available from the publication 'Calculation of 2013/14 Formula Funding' at <https://webarchive.nationalarchives.gov.uk/20140505105851/http://www.local.communities>.

1  
2  
3 [gov.uk/finance/1314/CalcFFs.pdf](https://www.gov.uk/finance/1314/CalcFFs.pdf) [accessed 05 September 2020]. The ‘type of local  
4 authority’ dummies are available from the data dictionary in the zip file at  
5  
6 [https://digital.nhs.uk/data-and-information/publications/statistical/adult-social-care-activity-](https://digital.nhs.uk/data-and-information/publications/statistical/adult-social-care-activity-and-finance-report/2017-18)  
7 [and-finance-report/2017-18](https://digital.nhs.uk/data-and-information/publications/statistical/adult-social-care-activity-and-finance-report/2017-18) [accessed 20 October 2020]. The healthcare expenditure data are  
8 available in the 2013-14 CCG Programme Budgeting Benchmarking Tool. This is available  
9 from <https://www.england.nhs.uk/prog-budgeting/> [accessed 05 September 2020]. The socio-  
10 economic variables are constructed using the 2011 Population Census. Census data is  
11 available from the Office for National Statistics at  
12 <https://www.ons.gov.uk/peoplepopulationandcommunity/populationandmigration/population>  
13 [estimates/datasets/2011censuskeystatisticsforlocalauthoritiesinenglandandwales](https://www.ons.gov.uk/peoplepopulationandcommunity/populationandmigration/population) [accessed 05  
14 September 2020]. The cells used to construct the socio-economic variables are listed in  
15 Table 92 of Claxton, K., Martin, S., Soares M, Rice N, Spackman E, Hinde S, Devlin N,  
16 Smith PC and Sculpher M. (2015). Methods for the estimation of the National Institute for  
17 Health and Care Excellence cost-effectiveness threshold. Health technology assessment,  
18 19(14), pp.1-503. Available from <https://www.ncbi.nlm.nih.gov/books/NBK274318/>  
19 [accessed 05 September 2020]. The public health expenditure data are available from ‘Local  
20 authority revenue expenditure and financing England: 2013 to 2014 individual local authority  
21 data – outturn’ which is available from [https://www.gov.uk/government/statistics/local-](https://www.gov.uk/government/statistics/local-authority-revenue-expenditure-and-financing-england-2013-to-2014-individual-local-authority-data-outturn)  
22 [authority-revenue-expenditure-and-financing-england-2013-to-2014-individual-local-](https://www.gov.uk/government/statistics/local-authority-revenue-expenditure-and-financing-england-2013-to-2014-individual-local-authority-data-outturn)  
23 [authority-data-outturn](https://www.gov.uk/government/statistics/local-authority-revenue-expenditure-and-financing-england-2013-to-2014-individual-local-authority-data-outturn) [accessed 05 September 2020]’. The instruments for public health  
24 expenditure are available in ‘Exposition Book Public Health Allocations 2013-14 and 2014-  
25 15: Technical Guide’ and this is available from  
26 [https://assets.publishing.service.gov.uk/government/uploads/system/uploads/attachment\\_data](https://assets.publishing.service.gov.uk/government/uploads/system/uploads/attachment_data/file/213324/Public-Health-Weighted-Capitation-FormulaTechnical-Guide-v0.13.pdf)  
27 [/file/213324/Public-Health-Weighted-Capitation-FormulaTechnical-Guide-v0.13.pdf](https://assets.publishing.service.gov.uk/government/uploads/system/uploads/attachment_data/file/213324/Public-Health-Weighted-Capitation-FormulaTechnical-Guide-v0.13.pdf)  
28 [accessed 05 September 2020]. The DFT variable for healthcare expenditure is available from  
29 the Department of Health’s website at [https://www.networks.nhs.uk/nhsnetworks/health-](https://www.networks.nhs.uk/nhsnetworks/health-investment-network/news/2012-13-programme-budgeting-data-is-now-available)  
30 [investment-network/news/2012-13-programme-budgeting-data-is-now-](https://www.networks.nhs.uk/nhsnetworks/health-investment-network/news/2012-13-programme-budgeting-data-is-now-available) available [accessed 05  
31 September 2020], and the MFF and prescribing cost age indices are available from the  
32 exposition books for the 2011/12 allocations at  
33 <https://www.gov.uk/government/publications/exposition-book-2011-2012> [accessed 05  
34 September 2020].  
35  
36  
37  
38  
39  
40  
41  
42  
43  
44  
45  
46  
47  
48  
49  
50  
51  
52  
53  
54  
55  
56  
57  
58  
59  
60

## References

1. Demakakos, P. (2019). Austerity, socioeconomic inequalities and stalling life expectancy in the UK: Two parallel stories or one? *Maturitas*, 123, pp89-90. Available from <https://doi.org/10.1016/j.maturitas.2018.12.007> [accessed 05 September 2020].
2. Hiam, L., Dorling, D. and McKee, M. (2018). The cuts and poor health: when and how can we say that one thing causes another? *Journal of the Royal Society of Medicine*, 111(6), 199–202. Available from <https://doi.org/10.1177/0141076818779237> [accessed 05 September 2020].
3. Marmot M. J (2018). *J Epidemiol Community Health*, May, Vol 72 No 5, pp359-360. Available from <https://jech.bmj.com/content/jech/72/5/359.full.pdf> [accessed 05 September 2020].
4. Hiam L, Harrison D, McKee M and D Dorling (2018). Why is life expectancy in England and Wales ‘stalling’? *J Epidemiol Community Health* 2018, 72, 404-408. Available from <https://jech.bmj.com/content/jech/72/5/404.full.pdf> [accessed 05 September 2020].
5. Faragher, R. (2017). Is austerity really to blame for stalling life expectancy in England? *The Conversation*, 20 July, 2017. Available from <http://theconversation.com/is-austerity-really-to-blame-for-stalling-life-expectancy-in-england-81206> [accessed 05 September 2020].
6. Loopstra, R., McKee, M., Katikireddi, S. V, Taylor-Robinson, D., Barr, B. and Stuckler, D. (2016). Austerity and old-age mortality in England: a longitudinal cross-local area analysis, 2007–2013. *Journal of the Royal Society of Medicine*, 109(3), 109-116. DOI: 10.1177/0141076816632215 [accessed 12 May 2021].
7. Dorling, D (2019). Austerity bites—falling life expectancy in the UK. *BMJ*, March 19. Available from <https://blogs.bmj.com/bmj/2019/03/19/danny-dorling/> [accessed 05 September 2020].
8. Watkins J, Wulaningsih W, Da Zhou C, *et al* (2017). Effects of health and social care spending constraints on mortality in England: a time trend analysis. *BMJ Open* 2017, v7, 11. DOI: 10.1136/bmjopen-2017-017722 [accessed 05 September 2020].
9. Claxton, K., Lomas, J. and Martin, S. (2018). The impact of NHS expenditure on health outcomes in England: Alternative approaches to identification in all-cause and disease specific models of mortality. *Health Economics*, 27(6), pp.1017-1023. Available at: <https://onlinelibrary.wiley.com/doi/abs/10.1002/hec.3650> [accessed 05 September 2020].
10. Martin, S., Lomas, J. and Claxton, K. (2020). Is an ounce of prevention worth a pound of cure? Estimates of the impact of English public health grant on mortality and morbidity. *BMJ Open*, volume 10, issue10. Available at: <https://bmjopen.bmj.com/content/10/10/e036411> [accessed 20 October 2020].

- 1  
2  
3 11. Forder, J., Vadean, F., Rand, S. & Malley, J. (2018). The impact of long-term care on  
4 quality of life. *Health economics*, 27, e43-e58. Available from  
5 <https://onlinelibrary.wiley.com/doi/10.1002/hec.3612> [accessed 05 September 2020].  
6  
7  
8 12. Fernandez, J.-L. and Forder, J. (2011). Consequences of local variations in social care on  
9 the performance of the acute health care sector. *Applied Economics*, 40, 1503-1518.  
10 Available from <https://www.tandfonline.com/doi/full/10.1080/00036840600843939>  
11 [accessed from 05 September 2020].  
12  
13  
14 13. Forder, J. (2009). Long-term care and hospital utilisation by older people: an analysis of  
15 substitution rates. *Health Economics*, 18, 1322-1338. Available from  
16 <https://onlinelibrary.wiley.com/doi/abs/10.1002/hec.1438> [accessed 05 September 2020].  
17  
18  
19 14. Gaughan, J., Gravelle, H. and Siciliani, L. (2015). Testing the bed-blocking hypothesis:  
20 does nursing and care home supply reduce delayed hospital discharges? *Health economics*,  
21 24, 32-44. Available from <https://onlinelibrary.wiley.com/doi/10.1002/hec.3150> [accessed  
22 05 September 2020].  
23  
24  
25 15. Forder, J., Gousia, K. & Saloniki, E.-C. (2018). The impact of long-term care on primary  
26 care doctor consultations for people over 75 years. *The European Journal of Health*  
27 *Economics*, 1-13. Available from  
28 [https://ideas.repec.org/a/spr/eujhec/v20y2019i3d10.1007\\_s10198-018-0999-6.html](https://ideas.repec.org/a/spr/eujhec/v20y2019i3d10.1007_s10198-018-0999-6.html) [accessed  
29 05 September 2020].  
30  
31  
32 16. Bradley, E. H., Canavan, M., Rogan, E., Talbert-Slagle, K., Ndumele, C., Taylor, L. and  
33 Curry, L. A. (2016). Variation in health outcomes: the role of spending on social services,  
34 public health and health care, 2000-09. *Health Affairs*, 35, 5. Available from  
35 <https://doi.org/10.1377/hlthaff.2015.0814> [accessed 30 April 2021].  
36  
37  
38 17. NAO (2018). Adult social care at a glance. National Audit Office, July. Available from  
39 <https://www.nao.org.uk/wp-content/uploads/2018/07/Adult-social-care-at-a-glance.pdf>  
40 [accessed 05 September 2020].  
41  
42  
43 18. Department of Health (2002). Fair access to care services guidance on eligibility criteria  
44 for adult social care. Available from  
45 [https://webarchive.nationalarchives.gov.uk/20121205180615/http://www.dh.gov.uk/prod\\_consum\\_dh/groups/dh\\_digitalassets/@dh/@en/documents/digitalasset/dh\\_4019641.pdf](https://webarchive.nationalarchives.gov.uk/20121205180615/http://www.dh.gov.uk/prod_consum_dh/groups/dh_digitalassets/@dh/@en/documents/digitalasset/dh_4019641.pdf) [accessed  
46 05 September 2020]  
47  
48  
49 19. NAO (2014). Planning for the Better Care Fund. National Audit Office, November.  
50 Available from <https://www.nao.org.uk/wp-content/uploads/2014/11/Planning-for-the-better-care-fund.pdf> [accessed 05 September 2020].  
51  
52  
53 20. NAO (2017). Health and social care integration. National Audit Office, February.  
54 Available from  
55  
56  
57  
58  
59  
60

1  
2  
3 <https://www.nao.org.uk/wp-content/uploads/2017/02/Health-and-social-care-integration.pdf>  
4 [accessed 05 September 2020].  
5

6  
7 21. DH (2012). Exposition Book Public Health Allocations 2013-14 and 2014-15: Technical  
8 Guide. Available from  
9 [https://assets.publishing.service.gov.uk/government/uploads/system/uploads/attachment\\_data](https://assets.publishing.service.gov.uk/government/uploads/system/uploads/attachment_data/file/213324/Public-Health-Weighted-Capitation-FormulaTechnical-Guide-v0.13.pdf)  
10 [/file/213324/Public-Health-Weighted-Capitation-FormulaTechnical-Guide-v0.13.pdf](https://assets.publishing.service.gov.uk/government/uploads/system/uploads/attachment_data/file/213324/Public-Health-Weighted-Capitation-FormulaTechnical-Guide-v0.13.pdf)  
11 [accessed 05 September 2020].  
12

13  
14 22. MCHLG (2015). Local authority revenue expenditure and financing England: 2013 to  
15 2014 individual local authority data – outturn. Available from  
16 [https://www.gov.uk/government/statistics/local-authority-revenue-expenditure-and-](https://www.gov.uk/government/statistics/local-authority-revenue-expenditure-and-financing-england-2013-to-2014-individual-local-authority-data-outturn)  
17 [financing-england-2013-to-2014-individual-local-authority-data-outturn](https://www.gov.uk/government/statistics/local-authority-revenue-expenditure-and-financing-england-2013-to-2014-individual-local-authority-data-outturn) [accessed 05  
18 September 2020].  
19

20  
21 23. NHS England (2012). Allocations for 2013/14. Available from  
22 <https://www.england.nhs.uk/allocations/allocations-2013-14/> [accessed 05 September 2020].  
23

24  
25 24. Andrews, M. et al., 2017. Inference in the presence of redundant moment conditions and  
26 the impact of government health expenditure on health outcomes in England. *Econometric*  
27 *Reviews*, 36(1–3), pp.23–41. Available from  
28 <https://www.tandfonline.com/doi/full/10.1080/07474938.2016.1114205> [accessed 05  
29 September, 2020].  
30

31  
32 25. DCLG (2013). Calculation of 2013/14 Formula Funding. January. See  
33 [https://webarchive.nationalarchives.gov.uk/20140505105851/http://www.local.communities.](https://webarchive.nationalarchives.gov.uk/20140505105851/http://www.local.communities.gov.uk/finance/1314/CalcFFs.pdf)  
34 [gov.uk/finance/1314/CalcFFs.pdf](https://webarchive.nationalarchives.gov.uk/20140505105851/http://www.local.communities.gov.uk/finance/1314/CalcFFs.pdf) [accessed 05 September 2020].  
35

36  
37 26. Forder, J, Malley, J, Towers A, and A Netten (2014). Using cost-effectiveness estimates  
38 from survey data to guide commissioning: an application to home care. *Health Economics*,  
39 23, 8, pp979-992. Available from <https://doi.org/10.1002/hec.2973> [accessed 05 September  
40 2020].  
41

42  
43 27. Sanderson, E. and F. Windmeijer, (2016). A Weak Instrument F-Test in Linear IV  
44 Models with Multiple Endogenous Variables. *Journal of Econometrics*, 190, 2, 212-221.  
45 Available from <https://doi.org/10.1016/j.jeconom.2015.06.004> [accessed 12 May 2021].  
46

47  
48 28. Baum, C.F., Schaffer, M.E., Stillman, S. (2010). ivreg2: Stata module for extended  
49 instrumental variables/2SLS, GMM and AC/HAC, LIML and k-class regression. Available  
50 from <http://ideas.repec.org/c/boc/bocode/s425401.html> [accessed 05 September 2020].  
51

52  
53 29. Pesaran, M.H. and L.W. Taylor, *Diagnostics for IV regressions*. Oxford Bulletin of  
54 Economics and Statistics, 1999. 61(2): p. 255-265.  
55

56  
57 30. NHS England (2015). 2013-14 CCG Programme Budgeting Benchmarking Tool.  
58 Available from <https://www.england.nhs.uk/prog-budgeting/> [accessed 05 September 2020].  
59  
60



- 1  
2  
3 31. Edney, L.C., Afzali, H.H.A., Cheng, T.C., Karnon, J.(2018). Estimating the reference  
4 incremental cost-effectiveness ratio for the Australian Health System.  
5 *Pharmacoeconomics* 36(2), 239–252. Available from  
6 <https://link.springer.com/article/10.1007/s40273-017-0585-2> [accessed 05 September 2020].  
7  
8  
9 32. Siverskog, J. & Henriksson, M (2019). Estimating the marginal cost of a life year in  
10 Sweden’s public healthcare sector. *Eur J Health Econ* (2019) 20: 751. Available from  
11 <https://doi.org/10.1007/s10198-019-01039-0> [accessed 05 September 2020].  
12  
13  
14 33. Vallejo-Torres, L., Garcia-Lorenzo, B., Serrano-Aguilar, P. (2018). Estimating a cost-  
15 effectiveness threshold for the Spanish NHS. *Health Economics*, 27(4), 746–761. Available  
16 from <https://onlinelibrary.wiley.com/doi/10.1002/hec.3633> [accessed 05 September 2020].  
17  
18  
19 34. Claxton, K., Martin, S., Soares M, Rice N, Spackman E, Hinde S, Devlin N, Smith PC  
20 and Sculpher M. (2015). Methods for the estimation of the National Institute for Health and  
21 Care Excellence cost-effectiveness threshold. *Health technology assessment*, 19(14), pp.1-  
22 503. Available from <https://www.ncbi.nlm.nih.gov/pubmed/25692211> [accessed 05  
23 September 2020].  
24  
25  
26  
27  
28  
29  
30  
31  
32  
33  
34  
35  
36  
37  
38  
39  
40  
41  
42  
43  
44  
45  
46  
47  
48  
49  
50  
51  
52  
53  
54  
55  
56  
57  
58  
59  
60

Table 1 Descriptive statistics for variables employed in study

| Variable description                                                                 | Obs | Mean    | Std. Dev. | Min     | Max       |
|--------------------------------------------------------------------------------------|-----|---------|-----------|---------|-----------|
| <i>Mortality rate, population, and expenditure variables</i>                         |     |         |           |         |           |
| Years of life lost rate, standardised, per 100,000 population, 2013/2014/2015 pooled | 151 | 443.3   | 85.0      | 267.5   | 775.9     |
| Local authority population, 2013/14                                                  | 151 | 369,610 | 271,897   | 2,381   | 1,481,378 |
| Social service spend per person, 2013/14, £                                          | 151 | 306.60  | 46.58     | 209.08  | 660.42    |
| NHS healthcare spend per person, 2013/14, £                                          | 151 | 1152.13 | 75.81     | 1019.89 | 1479.11   |
| Public health expenditure per person, 2013/14, £                                     | 152 | 52.60   | 25.15     | 18.52   | 186.21    |
| <i>Controls</i>                                                                      |     |         |           |         |           |
| Index of Multiple Deprivation 2010                                                   | 152 | 23.0753 | 8.6040    | 5.4466  | 43.4465   |
| Young adult social service need per person                                           | 151 | 1.0000  | 0.2519    | 0.4341  | 1.7546    |
| Older adult social service need per person                                           | 151 | 1.0000  | 0.2329    | 0.5714  | 1.9716    |
| Proportion of all residents born outside the European Union                          | 152 | 0.1281  | 0.1147    | 0.0144  | 0.5060    |
| Proportion of population in white ethnic group                                       | 152 | 0.8364  | 0.1626    | 0.2897  | 0.9882    |
| Proportion of population providing unpaid care                                       | 152 | 0.1008  | 0.0138    | 0.0651  | 0.1289    |
| Proportion of population aged 16-74 with no qualifications                           | 152 | 0.2469  | 0.0606    | 0.0720  | 0.3874    |
| Proportion of households without a car                                               | 152 | 0.2862  | 0.1248    | 0.0899  | 0.6940    |
| Proportion of households that are one pensioner households, 2011                     | 152 | 0.1206  | 0.0208    | 0.0596  | 0.1667    |
| Proportion of households that are lone parent households with dependent children     | 152 | 0.0745  | 0.0185    | 0.0208  | 0.1436    |
| Proportion of population aged 16-74 that are permanently sick                        | 152 | 0.0424  | 0.0149    | 0.0086  | 0.0879    |
| Proportion of those aged 16-74 that are long-term unemployed                         | 152 | 0.0183  | 0.0058    | 0.0043  | 0.0367    |
| Proportion of those aged 16-74 in employment that are working agriculture            | 152 | 0.0064  | 0.0099    | 0.0003  | 0.0572    |
| Proportion of those aged 16-74 in managerial and professional occupations            | 152 | 0.3114  | 0.0769    | 0.1835  | 0.6674    |
| <i>Instruments: for social service (GSS) expenditure</i>                             |     |         |           |         |           |
| Type of LA: county council                                                           | 152 | 0.1776  | 0.3835    | 0.0000  | 1.0000    |
| Type of LA: London borough                                                           | 152 | 0.2171  | 0.4136    | 0.0000  | 1.0000    |
| Type of LA: Metropolitan district                                                    | 152 | 0.2368  | 0.4266    | 0.0000  | 1.0000    |
| Type of LA: Unitary authority                                                        | 152 | 0.3684  | 0.4840    | 0.0000  | 1.0000    |
| Input price index for older people's social services                                 | 152 | 1.0426  | 0.0634    | 1.0000  | 1.3607    |
| Population sparsity measure                                                          | 151 | 1.0057  | 0.0079    | 1.0000  | 1.0345    |
| Proportion of households that are owner occupied                                     | 152 | 0.6190  | 0.1152    | 0.2611  | 0.8086    |
| <i>Instruments: for public health (PH) expenditure</i>                               |     |         |           |         |           |
| Distance from target index, public health expenditure, 2013/14                       | 152 | 1.0667  | 0.5362    | 0.5392  | 6.6247    |
| Input price index (MFF), public health expenditure, 2013/14                          | 152 | 1.0122  | 0.0790    | 0.9151  | 1.2076    |
| <i>Instruments: for NHS healthcare (PB) expenditure</i>                              |     |         |           |         |           |
| Distance from target index, NHS healthcare expenditure                               | 152 | 1.0055  | 0.0515    | 0.9282  | 1.2250    |
| Input price index (MFF), resource allocation HCHS formula                            | 152 | 1.0063  | 0.0643    | 0.9319  | 1.1416    |
| Age index, resource allocation prescribing formula                                   | 152 | 0.9776  | 0.1283    | 0.6422  | 1.3007    |

Table 2 Obtaining a preferred health outcome specification for social care, healthcare and public health expenditure, backward selection (second-stage results)

|                                                | (1)                | (2)             | (3)               | (4)               | (5)               | (6)               | (7)               |
|------------------------------------------------|--------------------|-----------------|-------------------|-------------------|-------------------|-------------------|-------------------|
|                                                | All causes         | All causes      | All causes        | All causes        | All causes        | All causes        | All causes        |
|                                                | 2013/14            | 2013/14         | 2013/14 PB/PSS/PH |
|                                                | PB/GSS/PH spend    | PB/GSS/PH spend | SYLLR 2013/14/15  |
|                                                | outcome model      | outcome model   | outcome model     | outcome model     | outcome model     | outcome model     | outcome model     |
|                                                |                    |                 | instrument        | instrument        | instrument        | instrument        | instrument        |
|                                                |                    |                 | PB/GSS/PH spend   |
|                                                | weighted           | weighted        | weighted          | weighted          | weighted          | weighted          | weighted          |
|                                                | OLS                | OLS             | IV second stage   |
|                                                | full specification | parsimonious    | parsimonious      | parsimonious_v2   | parsimonious_v3   | parsimonious_v4   | parsimonious_v5   |
|                                                | VARIABLES          |                 |                   |                   |                   |                   |                   |
| Public health expenditure per person           | 0.037              | 0.029           | 0.017             | 0.010             | 0.017             | -0.018            | -0.019            |
|                                                | [0.027]            | [0.027]         | [0.032]           | [0.039]           | [0.042]           | [0.041]           | [0.041]           |
| CCG (PB) healthcare spend per person           | -0.406***          | -0.492***       | -0.840***         | -0.609**          | -0.514            | -0.545**          | -0.532**          |
|                                                | [0.139]            | [0.119]         | [0.142]           | [0.251]           | [0.337]           | [0.243]           | [0.259]           |
| Social service (GSS) spend per person          | 0.044              | 0.039           | -0.078            | -0.272**          | -0.326*           | -0.344**          | -0.336**          |
|                                                | [0.055]            | [0.053]         | [0.102]           | [0.124]           | [0.182]           | [0.134]           | [0.152]           |
| Index of Multiple Deprivation 2010             | 0.219***           | 0.156**         | 0.239***          | 0.243***          | 0.238***          | -0.504*           | -0.505**          |
|                                                | [0.074]            | [0.066]         | [0.059]           | [0.068]           | [0.075]           | [0.260]           | [0.255]           |
| Young adult social service need per person     | 0.096              |                 |                   |                   |                   |                   |                   |
|                                                | [0.166]            |                 |                   |                   |                   |                   |                   |
| Older adult social service need per person     | 0.080              |                 |                   |                   |                   |                   |                   |
|                                                | [0.073]            |                 |                   |                   |                   |                   |                   |
| % residents born outside the European Union    | -0.038*            |                 |                   |                   |                   |                   |                   |
|                                                | [0.020]            |                 |                   |                   |                   |                   |                   |
| % population in white ethnic group             | 0.172***           | 0.227***        | 0.289***          | 0.309***          | 0.309***          | 0.321***          | 0.319***          |
|                                                | [0.054]            | [0.036]         | [0.036]           | [0.038]           | [0.041]           | [0.041]           | [0.046]           |
| % population providing unpaid care             | -0.455***          | -0.233***       | -0.214**          | -0.251**          | -0.230**          | -0.188**          | -0.190**          |
|                                                | [0.171]            | [0.086]         | [0.087]           | [0.098]           | [0.108]           | [0.085]           | [0.085]           |
| % population aged 16-74 with no qualifications | -0.043             |                 |                   |                   |                   |                   |                   |
|                                                | [0.101]            |                 |                   |                   |                   |                   |                   |
| % households without a car                     | -0.201***          |                 |                   |                   |                   |                   |                   |
|                                                | [0.074]            |                 |                   |                   |                   |                   |                   |
| % households that are one pensioner households | 0.057              |                 |                   |                   |                   |                   |                   |
|                                                | [0.073]            |                 |                   |                   |                   |                   |                   |

|    |                                                     |           |           |           |           |          |           |           |
|----|-----------------------------------------------------|-----------|-----------|-----------|-----------|----------|-----------|-----------|
| 1  | % lone parent households with dependent children    | 0.025     |           |           |           |          |           |           |
| 2  |                                                     | [0.065]   |           |           |           |          |           |           |
| 3  | % population aged 16-74 that are permanently sick   | 0.162*    | 0.217***  | 0.229***  | 0.262***  | 0.259*** | 0.271***  | 0.271***  |
| 4  |                                                     | [0.097]   | [0.069]   | [0.071]   | [0.087]   | [0.098]  | [0.080]   | [0.079]   |
| 5  | % aged 16-74 that are long-term unemployed          | 0.057     |           |           |           |          |           |           |
| 6  |                                                     | [0.057]   |           |           |           |          |           |           |
| 7  | % aged 16-74 in employment working agriculture      | -0.013    |           |           |           |          |           |           |
| 8  |                                                     | [0.012]   |           |           |           |          |           |           |
| 9  | % aged 16-74 in managerial/professional occupations | -0.241*** | -0.285*** | -0.190*** | -0.162*** | -0.154** | -0.098    | -0.100    |
| 10 |                                                     | [0.063]   | [0.044]   | [0.050]   | [0.051]   | [0.060]  | [0.062]   | [0.065]   |
| 11 | Index of Multiple Deprivation 2010 Squared          |           |           |           |           |          | 0.130***  | 0.130***  |
| 12 |                                                     |           |           |           |           |          | [0.043]   | [0.042]   |
| 13 | Constant                                            | 7.319***  | 8.862***  | 11.187*** | 9.408***  | 8.710*** | 10.277*** | 10.199*** |
| 14 |                                                     | [1.040]   | [0.819]   | [1.021]   | [1.693]   | [2.295]  | [1.568]   | [1.662]   |
| 15 | Observations                                        | 150       | 150       | 150       | 150       | 150      | 150       | 150       |
| 16 | R-squared                                           | 0.919     | 0.908     |           |           |          |           |           |
| 17 | Ramsey reset F statistic                            | 5.096     | 6.448     |           |           |          |           |           |
| 18 | Probability > F                                     | 0.002     | 0.000     |           |           |          |           |           |
| 19 | Endogeneity test statistic                          |           |           | 8.934     | 15.536    | 15.510   | 23.482    | 18.528    |
| 20 | Endogeneity p-value                                 |           |           | 0.030     | 0.001     | 0.001    | 0.000     | 0.000     |
| 21 | Hansen-Sargan test statistic                        |           |           | 21.671    | 10.327    | 2.506    | 0.265     | 0.257     |
| 22 | Hansen-Sargan p-value                               |           |           | 0.006     | 0.066     | 0.286    | 0.876     | 0.612     |
| 23 | Pesaran-Taylor reset statistic                      |           |           | 0.187     | 2.892     | 3.540    | 0.008     | 0.285     |
| 24 | Pesaran-Taylor p-value                              |           |           | 0.665     | 0.089     | 0.060    | 0.927     | 0.593     |
| 25 | Sanderson-Windmeijer_PB F-statistic                 |           |           | 8.390     | 8.966     | 13.333   | 14.352    | 15.818    |
| 26 | Sanderson-Windmeijer_PB p-value                     |           |           | 0.000     | 0.000     | 0.000    | 0.000     | 0.000     |
| 27 | Sanderson-Windmeijer_GSS F-statistic                |           |           | 4.437     | 4.875     | 6.720    | 9.063     | 11.567    |
| 28 | Sanderson-Windmeijer_GSS p-value                    |           |           | 0.000     | 0.000     | 0.000    | 0.000     | 0.000     |
| 29 | Sanderson-Windmeijer_PH F-statistic                 |           |           | 28.259    | 37.927    | 56.035   | 56.146    | 59.408    |
| 30 | Sanderson-Windmeijer_PH p-value                     |           |           | 0.000     | 0.000     | 0.000    | 0.000     | 0.000     |

Robust standard errors in brackets

\*\*\* p<0.01, \*\* p<0.05, \* p<0.1

Table 3 Obtaining a joint preferred specification for social care, healthcare and public health expenditure by combining full specifications with forward selection (second-stage results)

|                                                   | (1)<br>All causes<br>2013/14 PB/PSS/PH spend<br>SYLLR 2013/14/15<br>outcome model<br>instrument PB/GSS/PH<br>spend<br>weighted<br>IV second stage<br>parsimonious specification<br>11 instruments | (2)<br>All causes<br>2013/14 PB/PSS/PH spend<br>SYLLR 2013/14/15<br>outcome model<br>instrument PB/GSS/PH<br>spend<br>weighted<br>IV second stage<br>specification_2<br>7 instruments | (3)<br>All causes<br>2013/14 PB/PSS/PH spend<br>SYLLR 2013/14/15<br>outcome model<br>instrument PB/GSS/PH<br>spend<br>weighted<br>IV second stage<br>specification_3<br>5 instruments | (4)<br>All causes<br>2013/14 PB/PSS/PH spend<br>SYLLR 2013/14/15<br>outcome model<br>instrument PB/GSS/PH<br>spend<br>weighted<br>IV second stage<br>specification_4<br>4 instruments |
|---------------------------------------------------|---------------------------------------------------------------------------------------------------------------------------------------------------------------------------------------------------|---------------------------------------------------------------------------------------------------------------------------------------------------------------------------------------|---------------------------------------------------------------------------------------------------------------------------------------------------------------------------------------|---------------------------------------------------------------------------------------------------------------------------------------------------------------------------------------|
| VARIABLES                                         |                                                                                                                                                                                                   |                                                                                                                                                                                       |                                                                                                                                                                                       |                                                                                                                                                                                       |
| Public health expenditure per person              | -0.051<br>[0.039]                                                                                                                                                                                 | -0.043<br>[0.047]                                                                                                                                                                     | -0.060<br>[0.044]                                                                                                                                                                     | -0.099**<br>[0.045]                                                                                                                                                                   |
| CCG (PB) healthcare spend per person              | -0.862***<br>[0.223]                                                                                                                                                                              | -0.461<br>[0.313]                                                                                                                                                                     | -0.637*<br>[0.369]                                                                                                                                                                    | -0.693**<br>[0.333]                                                                                                                                                                   |
| Social service (GSS) spend per person             | -0.206<br>[0.133]                                                                                                                                                                                 | -0.469***<br>[0.161]                                                                                                                                                                  | -0.370*<br>[0.205]                                                                                                                                                                    | -0.471**<br>[0.237]                                                                                                                                                                   |
| % population aged 16-74 that are permanently sick | 0.649***<br>[0.046]                                                                                                                                                                               | 0.651***<br>[0.054]                                                                                                                                                                   | 0.672***<br>[0.052]                                                                                                                                                                   | 0.528***<br>[0.073]                                                                                                                                                                   |
| % population providing unpaid care                | -0.381***<br>[0.086]                                                                                                                                                                              | -0.388***<br>[0.096]                                                                                                                                                                  | -0.400***<br>[0.097]                                                                                                                                                                  | -0.143<br>[0.118]                                                                                                                                                                     |
| % population in white ethnic group                | 0.163***<br>[0.042]                                                                                                                                                                               | 0.195***<br>[0.043]                                                                                                                                                                   | 0.180***<br>[0.046]                                                                                                                                                                   | 0.299***<br>[0.078]                                                                                                                                                                   |
| Older adult: social service need per person       |                                                                                                                                                                                                   |                                                                                                                                                                                       |                                                                                                                                                                                       | 0.416***<br>[0.143]                                                                                                                                                                   |
| Constant                                          | 13.352***<br>[1.733]                                                                                                                                                                              | 10.204***<br>[2.389]                                                                                                                                                                  | 11.655***<br>[2.873]                                                                                                                                                                  | 12.245***<br>[2.546]                                                                                                                                                                  |
| Observations                                      | 150                                                                                                                                                                                               | 150                                                                                                                                                                                   | 150                                                                                                                                                                                   | 150                                                                                                                                                                                   |
| Endogeneity test statistic                        | 10.644                                                                                                                                                                                            | 17.686                                                                                                                                                                                | 21.100                                                                                                                                                                                | 23.214                                                                                                                                                                                |
| Endogeneity p-value                               | 0.014                                                                                                                                                                                             | 0.001                                                                                                                                                                                 | 0.000                                                                                                                                                                                 | 0.000                                                                                                                                                                                 |
| Hansen-Sargan test statistic                      | 25.690                                                                                                                                                                                            | 10.432                                                                                                                                                                                | 2.173                                                                                                                                                                                 | 0.080                                                                                                                                                                                 |
| Hansen-Sargan p-value                             | 0.001                                                                                                                                                                                             | 0.034                                                                                                                                                                                 | 0.337                                                                                                                                                                                 | 0.778                                                                                                                                                                                 |
| Pesaran-Taylor reset statistic                    | 0.052                                                                                                                                                                                             | 0.372                                                                                                                                                                                 | 0.080                                                                                                                                                                                 | 0.001                                                                                                                                                                                 |
| Pesaran-Taylor p-value                            | 0.820                                                                                                                                                                                             | 0.542                                                                                                                                                                                 | 0.777                                                                                                                                                                                 | 0.972                                                                                                                                                                                 |
| SW_PB F-statistic                                 | 5.977                                                                                                                                                                                             | 6.833                                                                                                                                                                                 | 7.878                                                                                                                                                                                 | 13.534                                                                                                                                                                                |
| SW_PB p-value                                     | 0.000                                                                                                                                                                                             | 0.000                                                                                                                                                                                 | 0.000                                                                                                                                                                                 | 0.000                                                                                                                                                                                 |
| SW_GSS F-statistic                                | 4.939                                                                                                                                                                                             | 5.521                                                                                                                                                                                 | 6.135                                                                                                                                                                                 | 9.722                                                                                                                                                                                 |
| SW_GSS p-value                                    | 0.000                                                                                                                                                                                             | 0.000                                                                                                                                                                                 | 0.001                                                                                                                                                                                 | 0.000                                                                                                                                                                                 |
| SW_PH F-statistic                                 | 18.451                                                                                                                                                                                            | 22.092                                                                                                                                                                                | 30.944                                                                                                                                                                                | 46.946                                                                                                                                                                                |

---

| SW_PH p-value | 0.000 | 0.000 | 0.000 | 0.000 |
|---------------|-------|-------|-------|-------|
|---------------|-------|-------|-------|-------|

---

Robust standard errors in brackets  
\*\*\* p<0.01, \*\* p<0.05, \* p<0.1

For peer review only

1  
2  
3  
4  
5  
6  
7  
8  
9  
10  
11  
12  
13  
14  
15  
16  
17  
18  
19  
20  
21  
22  
23  
24  
25  
26  
27  
28  
29  
30  
31  
32  
33  
34  
35  
36  
37  
38  
39  
40  
41  
42  
43  
44  
45  
46

Table 4 Results summary

| Type of health-related expenditure                            | Health outcome elasticity  |                            | Spending gap per capita between 2001/02- 2009/10 and 2010/11-2014/15 | Deaths attributable to spending gap (=annual deaths*elasticity*gap) |                            | Deaths attributable to spending gap from time trend analysis <sup>7</sup> |
|---------------------------------------------------------------|----------------------------|----------------------------|----------------------------------------------------------------------|---------------------------------------------------------------------|----------------------------|---------------------------------------------------------------------------|
|                                                               | Backward Selection         | Forward Selection          |                                                                      | Backward Selection                                                  | Forward Selection          |                                                                           |
|                                                               | column 1                   | column 2                   | column 3                                                             | column 4                                                            | column 5                   | column 6                                                                  |
| Social care expenditure<br>[95% confidence interval]          | -0.336<br>[-0.031, -0.640] | -0.471<br>[0.003, -0.945]  | 15.08%                                                               | 23,662<br>[2,183, 45,071]                                           | 33,170<br>[-211, 66,550]   | n/a                                                                       |
| Healthcare expenditure<br>[95% confidence interval]           | -0.532<br>[-0.014, -1.050] | -0.693<br>[-0.027, -1.359] | 13.64%                                                               | 33,888<br>[892, 66,884]                                             | 44,143<br>[1,720, 86,567]  | n/a                                                                       |
| Total social care and healthcare<br>[95% confidence interval] | n/a                        | n/a                        | n/a                                                                  | 57,550<br>[3,075, 111,955]                                          | 77,313<br>[1,509, 153,117] | 45,368<br>[34,530, 56,206]                                                |

For Peer review only

Figure 1 Illustration of the reverse causation issue and its resolution

For peer review only

1  
2  
3  
4  
5  
6  
7  
8  
9  
10  
11  
12  
13  
14  
15  
16  
17  
18  
19  
20  
21  
22  
23  
24  
25  
26  
27  
28  
29  
30  
31  
32  
33  
34  
35  
36  
37  
38  
39  
40  
41  
42  
43  
44  
45  
46



Figure 1 Illustration of the reverse causation issue and its resolution

Part (a)

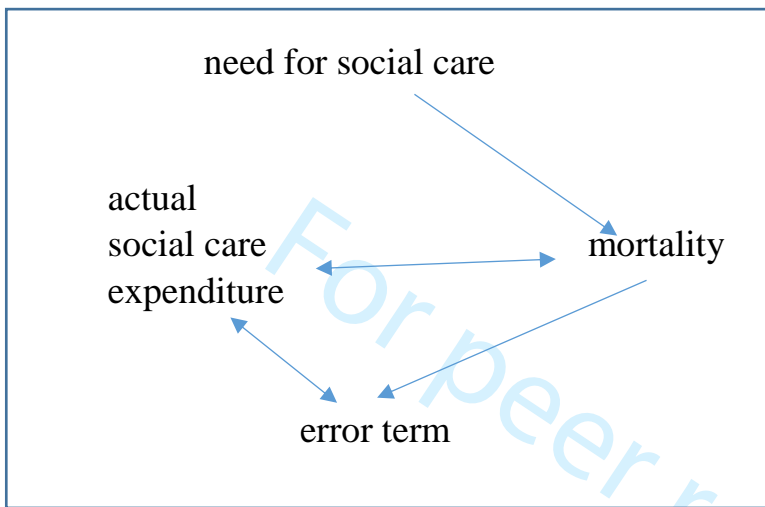

Part (b)

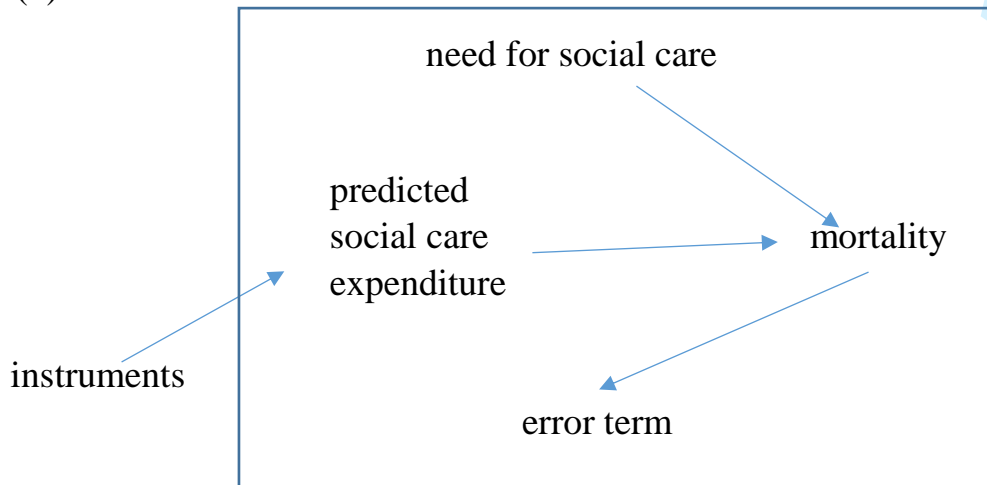

# The causal impact of social care, public health and healthcare expenditure on mortality in England: cross-sectional evidence for 2013/14

## Appendices

### Appendix A1: Further details about the instruments for healthcare expenditure

For 2013/14 the Department of Health allocated each Clinical Commissioning Group (CCG) a fixed proportion of the national budget (£65bn). CCGs used this allocation to fund expenditure on most types of healthcare except primary care, specialised commissioning and public health. CCGs reported their actual expenditure across various programmes of care and this data can be found in the programme budgeting dataset. This is available from <https://www.england.nhs.uk/programme-budgeting/> [accessed 05 September 2020].

Healthcare expenditure is instrumented in a similar way to social care expenditure and in line with equation (2) in the main text. The selection of the relevant funding rule variables for healthcare expenditure for 2013/14 is more difficult than usual due to the changes enacted by the Health and Social Care Act 2012. Normally, resource allocation formulae are updated annually but the approaching replacement of Primary Care Trusts (one set of local health authorities) with CCGs (a different set with different responsibilities) led to the freezing of the weighted capitation formula for 2012/13, with all Primary Care Trusts (PCTs) receiving the same (3%) growth rate over their 2011/12 allocations. Because CCGs were not responsible for the same set of services as PCTs (CCGs lost responsibility for primary care public health, specialised services, and primary care), there was a baseline exercise in 2012 that identified actual PCT expenditure on CCG service responsibilities and, for 2013/14, each CCG enjoyed an uplift of 2.3% on these 2012/13 baselines.

As a result of these changes, the most appropriate funding rule variables for CCG healthcare expenditure in 2013/14 are drawn from the 2011/12 allocations for PCTs, appropriately converted to the new (CCG) geography. These allocations reflect components of the funding formulae (one for the total allocation, one for Hospital and Community Health Services (HCHS), and one for prescribing), and we select three funding rule variables employed in these formulae which we believe are uncorrelated with mortality. More precisely, the funding rule variables for CCG

1  
2 healthcare expenditure for 2013/14 are: (i) the age index from the prescribing component of the  
3 total allocation; (ii) the MFF for the HCHS component of the total allocation; and (iii) the DFT for  
4 the total allocation to PCTs for 2011/12.  
5  
6  
7  
8  
9

## 10 **Appendix A2: Further details about the instruments for local public health expenditure**

11  
12  
13  
14 The resource allocation formula used to distribute the total public health budget to local authorities  
15 has three components. These are for substance misuse services, for non-mandatory services, and  
16 for mandatory services. Each of these three service areas has its own resource allocation formula  
17 but each formula has a similar structure to that outlined in equation (2) in the main text and two of  
18 the four variables in equation (2) (the MFF and the DFT) are present for all three components.  
19 Hence we use these variables as instruments for public health expenditure.  
20  
21  
22  
23  
24  
25  
26  
27

## 28 **Appendix A3 Are the selected instruments valid?**

29  
30 We noted in section 3 that valid instruments should be both uncorrelated with unobserved  
31 determinants of expenditure and mortality (i.e., instruments should be exogenous) and excludable  
32 from the second-stage regression equation (i.e., have no direct impact on mortality other than  
33 through their impact on expenditure). Let us consider whether the proposed instruments for our  
34 three expenditure variables are likely to meet these requirements.  
35  
36  
37  
38  
39  
40

### 41 *The MFF instrument for healthcare, public health and social care expenditure*

42  
43 The MFF (input price index) adjustment reflects prices in the local health economy and is used as  
44 an instrument for all three types of expenditure. It is designed to compensate health authorities for  
45 the unavoidable higher costs they incur when hiring staff and buying other goods and services. If  
46 the MFF adjustment is perfect then each authority would be able to buy the same bundle of inputs.  
47 The instrument could have no impact on mortality because it has no impact on real expenditure. In  
48 practice, however, the MFF adjustment will be imperfect and these imperfections will generate  
49 differences in the volume of real resources available to health authorities (we assume that this error  
50 is small relative to the adjustment for local prices). We have no reason to believe that errors in the  
51 MFF adjustment will have any effect on mortality other than through their effect on expenditure  
52 (this is required for the excludability assumption). However, the MFF index reflects characteristics  
53 of the local (health) economy that could potentially be correlated with unmeasured determinants of  
54  
55  
56  
57  
58  
59  
60

1 mortality and this instrument's exogeneity is therefore conditional on the socio-economic variables  
2 included in the estimated specification.  
3  
4

### 5 6 7 *The age-cost index instrument for healthcare*

8 A similar argument can be made for the age-cost index that is used as an instrument for healthcare  
9 expenditure. This is designed to compensate health authorities for the unavoidable additional  
10 expenditure they incur due to the demographic profile of their population. If the age-cost  
11 adjustment is perfect for every health authority then all authorities would be able to offer the same  
12 level of healthcare irrespective of whether their population is a particularly old or young one.  
13 Again, this (age-cost) index will be a useful predictor of nominal expenditure but, if the adjustment  
14 is perfect, this instrument can have no impact on mortality because it has no impact on real  
15 expenditure. Although an imperfect age-cost adjustment will generate differences in the volume of  
16 real resources available to health authorities, there is no reason to believe that these errors will have  
17 any effect on mortality other than through their effect on expenditure. The age-cost index reflects  
18 the impact of the local population's demographic profile on healthcare costs. As is the case for the  
19 MFF, this profile could potentially be correlated with unmeasured determinants of mortality and  
20 this instrument's exogeneity is therefore conditional on the control variables employed in the  
21 estimated specification.  
22  
23  
24  
25  
26  
27  
28  
29  
30  
31  
32  
33

### 34 35 *The distance from target index instrument for public health and healthcare expenditure*

36 The share of the national budget for both public health and healthcare expenditure apportioned to  
37 each health authority is governed by the Department of Health's allocation formula or 'funding  
38 rule'. This reflects each authority's need for expenditure and this, in turn, reflects the authority's  
39 population size, its age profile, local input prices, and other 'need for health care' factors.  
40 Periodically, the Department of Health revises its funding rule and this, together with data updates,  
41 generates a new target allocation for each authority. The new funding rule might generate a large  
42 change in the target allocation for some authorities and, to avoid sudden large reductions in actual  
43 budgets, such changes are usually incorporated into annual budgets over a number of years. The  
44 DFT index measures how far an authority's actual budget is below or above its target allocation.  
45  
46  
47  
48  
49  
50  
51  
52  
53

54 A DFT index is used as an instrument for public health and healthcare expenditure. The DFT for  
55 healthcare will reflect the various funding formulae and 'pace of change' policies implemented  
56 under several governments of various political persuasions over the past thirty years. While there  
57 are undeniably policy choices involved, such as the setting of the 'pace of change' (POC)  
58 adjustment that transitions PCTs towards their target, over the recent past the POC policy focussed  
59  
60

1  
2 on providing a minimum basic budget uplift for all authorities with a larger increase for those that  
3 were most under-target. We have no evidence to suggest that these policy choices were made on  
4 the basis of other factors such as outcomes (excludability). Moreover, health authority allocations  
5 usually include a relatively small component that seeks to address health inequalities directly and it  
6 is at this point that outcomes are considered rather than at the POC policy stage. We also have no  
7 evidence to suggest that, conditional on our controls, the DFT index will be correlated with  
8 unmeasured/unobserved determinants of mortality (exogeneity).  
9  
10  
11  
12  
13  
14

15  
16 As noted above, a DFT index reflects how far an authority's actual budget is from its target  
17 allocation. This difference will reflect the product of three factors for the public health DFT index:  
18 (i) the size of PCT expenditure in 2010/11 on those public health activities that were transferred to  
19 local authorities in 2013/14; (ii) the public health grant funding formula for 2013/14; and (iii) the  
20 'pace of change' policy for the 2013/14 public health allocations (i.e., the extent to which actual  
21 allocations for 2013/14 moved budgets away from what had been spent on public health by PCTs  
22 and towards the target allocations generated by the new funding rule for 2013/14). We have no  
23 evidence to suggest that the resulting public health DFT was selected on the basis of factors such as  
24 mortality (excludability assumption). We also have no evidence to suggest that, conditional on our  
25 controls, the public health DFT index will be correlated with unmeasured/unobserved determinants  
26 of mortality (exogeneity).  
27  
28  
29  
30  
31  
32  
33  
34  
35

### 36 *The population sparsity index as an instrument for social care expenditure*

37  
38 The population sparsity index is designed to compensate health authorities for the unavoidable  
39 higher costs they incur by having to serve a sparsely populated area. If this sparsity adjustment is  
40 perfect then each authority would be perfectly compensated for any additional costs and be able to  
41 provide the same service level. The instrument could have no impact on mortality because it has no  
42 impact on real expenditure. In practice, of course, the sparsity adjustment will be imperfect and  
43 these imperfections will generate differences in the volume of real resources available to health  
44 authorities. As was the case for the MFF index, we have no reason to believe that errors in the  
45 sparsity adjustment will have any effect on mortality other than through their effect on expenditure.  
46 However, the sparsity index may be correlated with characteristics of the local (health) economy  
47 that could potentially be correlated with unmeasured determinants of mortality. This instrument's  
48 exogeneity is therefore conditional on the socio-economic variables included in the estimated  
49 specification.  
50  
51  
52  
53  
54  
55  
56  
57  
58  
59  
60

1  
2 *The type of local authority as an instrument for social care expenditure*

3  
4 A study of the impact of LA expenditure on home care services claimed that social care expenditure  
5 will reflect the service eligibility policy employed by different LAs and that ‘the innate culture and  
6 perspective of the council...will drive the generosity of policies more than small differences in the  
7 health of the population’. The researchers proposed the use of a set of four dummy variables  
8 reflecting the type of LA (Shire, Unitary, Metropolitan, London) as instruments on the assumption  
9 that ‘similar’ LAs will have ‘similar’ eligibility policies and expenditure levels. Conditional on the  
10 controls for social care need, we have no reason to believe that there will be a direct effect of the  
11 type of LA on mortality. The type of LA could be correlated with unmeasured determinants of  
12 mortality and so this instrument’s exogeneity is also conditional on the socio-economic variables  
13 included in the estimated specification.  
14  
15  
16  
17  
18  
19  
20  
21

22  
23 *The proportion of households that are owner occupied as an instrument for social care expenditure*

24 Conditional on the controls for social care need included in the estimated specification, we have no  
25 reason to believe that there will be a direct effect of the proportion of households that are owner  
26 occupied on mortality. The proportion of households that are owner occupied could be correlated  
27 with unmeasured determinants of mortality and so this instrument’s exogeneity is also conditional  
28 on the socio-economic variables included in the estimated specification.  
29  
30  
31  
32  
33

34  
35 In addition to the theoretical considerations outlined above, the validity of all instruments is tested  
36 empirically using the Hansen-Sargan test. The set of instruments associated with our preferred  
37 specifications pass this empirical test.  
38  
39  
40  
41  
42  
43

44 **Appendix A4**

45  
46  
47 This appendix contains the first-stage regressions associated with the second-stage results reported  
48 in the main body of the text.  
49  
50  
51  
52  
53  
54  
55  
56  
57  
58  
59  
60

Table A1 Obtaining a preferred health outcome specification for social care, healthcare and public health expenditure, backward selection, first-stage results

|                                                  | (1)                        | (2)                        | (3)                        | (4)                 | (5)                  | (6)                  | (7)                  | (8)                  | (9)                  |
|--------------------------------------------------|----------------------------|----------------------------|----------------------------|---------------------|----------------------|----------------------|----------------------|----------------------|----------------------|
|                                                  | All causes                 | All causes                 | All causes                 | All causes          | All causes           | All causes           | All causes           | All causes           | All causes           |
|                                                  | 2013/14 PB spend           | 2013/14 G_SS spend         | 2013/14 PH spend           | 2013/14 PB spend    | 2013/14 G_SS spend   | 2013/14 PH spend     | 2013/14 PB spend     | 2013/14 G_SS spend   | 2013/14 PH spend     |
|                                                  | SYLLR 2013/14/15           | SYLLR 2013/14/15           | SYLLR 2013/14/15           | SYLLR 2013/14/15    | SYLLR 2013/14/15     | SYLLR 2013/14/15     | SYLLR 2013/14/15     | SYLLR 2013/14/15     | SYLLR 2013/14/15     |
|                                                  | outcome model              | outcome model              | outcome model              | outcome model       | outcome model        | outcome model        | outcome model        | outcome model        | outcome model        |
|                                                  | first-stage                | first-stage                | first-stage                | first-stage         | first-stage          | first-stage          | first-stage          | first-stage          | first-stage          |
|                                                  | weighted                   | weighted                   | weighted                   | weighted            | weighted             | weighted             | weighted             | weighted             | weighted             |
|                                                  | OLS                        | OLS                        | OLS                        | OLS                 | OLS                  | OLS                  | OLS                  | OLS                  | OLS                  |
|                                                  | parsimonious specification | parsimonious specification | parsimonious specification | parsimonious_v2     | parsimonious_v2      | parsimonious_v2      | parsimonious_v3      | parsimonious_v3      | parsimonious_v3      |
| VARIABLES                                        |                            |                            |                            |                     |                      |                      |                      |                      |                      |
| DFT index, public health expenditure, 2013/14    | 0.011<br>[0.027]           | 0.054<br>[0.061]           | 0.737***<br>[0.050]        | 0.022<br>[0.026]    | 0.033<br>[0.067]     | 0.736***<br>[0.045]  | 0.021<br>[0.026]     | 0.039<br>[0.064]     | 0.755***<br>[0.054]  |
| MFF, public health expenditure, 2013/14          | 0.099<br>[0.438]           | 1.033<br>[1.010]           | 0.945<br>[1.016]           |                     |                      |                      |                      |                      |                      |
| DFT index, NHS healthcare expenditure            | 0.537***<br>[0.155]        | 0.012<br>[0.359]           | 0.590**<br>[0.276]         | 0.536***<br>[0.151] | 0.009<br>[0.380]     | 0.587**<br>[0.279]   | 0.541***<br>[0.158]  | 0.045<br>[0.391]     | 0.633*<br>[0.326]    |
| Age index, prescribing cost formula              | 0.234***<br>[0.084]        | 0.230<br>[0.197]           | -1.080***<br>[0.270]       | 0.226***<br>[0.084] | 0.179<br>[0.201]     | -1.129***<br>[0.276] | 0.250***<br>[0.076]  | 0.077<br>[0.208]     | -1.423***<br>[0.262] |
| MFF, resource allocation HCHS formula            | -0.425<br>[0.488]          | -1.459<br>[1.093]          | -1.619<br>[1.203]          |                     |                      |                      |                      |                      |                      |
| Type of LA: London borough                       | 0.036<br>[0.024]           | -0.113**<br>[0.054]        | -0.034<br>[0.058]          |                     |                      |                      |                      |                      |                      |
| Type of LA: Metropolitan district                | 0.017<br>[0.017]           | -0.113***<br>[0.030]       | 0.010<br>[0.043]           | 0.017<br>[0.015]    | -0.068**<br>[0.030]  | 0.041<br>[0.038]     | 0.008<br>[0.013]     | -0.056**<br>[0.023]  | 0.030<br>[0.029]     |
| Type of LA: Unitary authority                    | 0.002<br>[0.011]           | -0.025<br>[0.026]          | 0.053<br>[0.032]           | 0.003<br>[0.009]    | 0.004<br>[0.026]     | 0.075***<br>[0.028]  |                      |                      |                      |
| Area cost adj for older people's social services | 0.270<br>[0.281]           | 0.527<br>[0.590]           | 0.444<br>[0.454]           | 0.215<br>[0.182]    | -0.131<br>[0.425]    | -0.051<br>[0.407]    |                      |                      |                      |
| Population sparsity measure                      | 0.820<br>[0.719]           | -4.418*<br>[2.314]         | -8.406***<br>[2.403]       | 1.300**<br>[0.653]  | -3.199<br>[2.360]    | -6.998***<br>[2.250] |                      |                      |                      |
| % households that are owner occupied             | -0.114**<br>[0.055]        | -0.356***<br>[0.107]       | -0.163<br>[0.128]          | -0.107**<br>[0.053] | -0.466***<br>[0.106] | -0.233**<br>[0.117]  | -0.148***<br>[0.051] | -0.377***<br>[0.091] | 0.007<br>[0.099]     |
| Index of Multiple Deprivation 2010               | -0.028<br>[0.051]          | 0.135<br>[0.106]           | 0.218*<br>[0.119]          | -0.007<br>[0.053]   | 0.062<br>[0.103]     | 0.192*<br>[0.102]    | -0.008<br>[0.054]    | 0.041<br>[0.110]     | 0.122<br>[0.113]     |
| % population in white ethnic group               | 0.079*<br>[0.042]          | 0.135*<br>[0.071]          | 0.152*<br>[0.084]          | 0.073*<br>[0.044]   | 0.208***<br>[0.072]  | 0.194**<br>[0.078]   | 0.073*<br>[0.041]    | 0.190***<br>[0.065]  | 0.180*<br>[0.092]    |
| % population providing unpaid care               | -0.101<br>[0.092]          | 0.385*<br>[0.230]          | -0.017<br>[0.205]          | -0.073<br>[0.091]   | 0.429*<br>[0.220]    | 0.048<br>[0.207]     | -0.053<br>[0.093]    | 0.340*<br>[0.194]    | -0.270<br>[0.236]    |
| % population aged 16-74 permanently sick         | 0.039<br>[0.061]           | -0.019<br>[0.116]          | 0.270**<br>[0.111]         | 0.036<br>[0.061]    | 0.007<br>[0.118]     | 0.284**<br>[0.110]   | 0.021<br>[0.059]     | 0.072<br>[0.111]     | 0.481***<br>[0.124]  |
| % aged 16-74 in managerial/prof occupations      | -0.104**<br>[0.045]        | 0.211**<br>[0.094]         | -0.121<br>[0.094]          | -0.097**<br>[0.046] | 0.186*<br>[0.103]    | -0.129<br>[0.092]    | -0.083**<br>[0.038]  | 0.183**<br>[0.090]   | -0.158*<br>[0.093]   |
| Constant                                         | 6.841***<br>[0.294]        | -0.557<br>[0.533]          | 3.800***<br>[0.542]        | 6.844***<br>[0.300] | -0.241<br>[0.551]    | 4.028***<br>[0.555]  | 6.863***<br>[0.300]  | -0.166<br>[0.569]    | 4.191***<br>[0.609]  |
| Observations                                     | 150                        | 150                        | 150                        | 150                 | 150                  | 150                  | 150                  | 150                  | 150                  |
| Robust standard errors in brackets               |                            |                            |                            |                     |                      |                      |                      |                      |                      |
| *** p<0.01, ** p<0.05, * p<0.1                   |                            |                            |                            |                     |                      |                      |                      |                      |                      |

Table A1 continued

## Obtaining a preferred health outcome specification for social care, healthcare and public health expenditure, backward selection, first-stage results

|                                               | (10)                 | (11)                 | (12)                 | (13)                | (14)                 | (15)                 |
|-----------------------------------------------|----------------------|----------------------|----------------------|---------------------|----------------------|----------------------|
|                                               | All causes           | All causes           | All causes           | All causes          | All causes           | All causes           |
|                                               | 2013/14 PB spend     | 2013/14 G_SS spend   | 2013/14 PH spend     | 2013/14 PB spend    | 2013/14 G_SS spend   | 2013/14 PH spend     |
|                                               | SYLLR 2013/14/15     | SYLLR 2013/14/15     | SYLLR 2013/14/15     | SYLLR 2013/14/15    | SYLLR 2013/14/15     | SYLLR 2013/14/15     |
|                                               | outcome model        | outcome model        | outcome model        | outcome model       | outcome model        | outcome model        |
|                                               | first-stage          | first-stage          | first-stage          | first-stage         | first-stage          | first-stage          |
|                                               | weighted             | weighted             | weighted             | weighted            | weighted             | weighted             |
|                                               | OLS                  | OLS                  | OLS                  | OLS                 | OLS                  | OLS                  |
|                                               | parsimonious_v4      | parsimonious_v4      | parsimonious_v4      | parsimonious_v5     | parsimonious_v5      | parsimonious_v5      |
| VARIABLES                                     |                      |                      |                      |                     |                      |                      |
| DFT index, public health expenditure, 2013/14 | 0.014<br>[0.027]     | 0.062<br>[0.055]     | 0.764***<br>[0.058]  | 0.027<br>[0.026]    | 0.083<br>[0.054]     | 0.761***<br>[0.056]  |
| DFT index, NHS healthcare expenditure         | 0.592***<br>[0.158]  | -0.136<br>[0.344]    | 0.566*<br>[0.340]    | 0.594***<br>[0.161] | -0.131<br>[0.344]    | 0.565*<br>[0.340]    |
| Age index, prescribing cost formula           | 0.218***<br>[0.080]  | 0.190<br>[0.217]     | -1.382***<br>[0.286] | 0.227***<br>[0.085] | 0.205<br>[0.226]     | -1.384***<br>[0.284] |
| Type of LA: Metropolitan district             | 0.012<br>[0.013]     | -0.069***<br>[0.023] | 0.026<br>[0.029]     | 0.004<br>[0.013]    | -0.082***<br>[0.024] | 0.027<br>[0.027]     |
| % households that are owner occupied          | -0.175***<br>[0.051] | -0.282***<br>[0.100] | 0.042<br>[0.117]     |                     |                      |                      |
| Index of Multiple Deprivation 2010            | 0.195<br>[0.171]     | -0.680*<br>[0.351]   | -0.145<br>[0.455]    | 0.079<br>[0.154]    | -0.868**<br>[0.350]  | -0.117<br>[0.421]    |
| % population in white ethnic group            | 0.078*<br>[0.040]    | 0.173**<br>[0.067]   | 0.173*<br>[0.096]    | 0.063<br>[0.040]    | 0.149**<br>[0.068]   | 0.177*<br>[0.095]    |
| % population providing unpaid care            | -0.037<br>[0.092]    | 0.284<br>[0.205]     | -0.291<br>[0.244]    | -0.189**<br>[0.094] | 0.039<br>[0.207]     | -0.254<br>[0.232]    |
| % population aged 16-74 permanently sick      | 0.025<br>[0.058]     | 0.055<br>[0.107]     | 0.475***<br>[0.124]  | 0.056<br>[0.063]    | 0.104<br>[0.109]     | 0.467***<br>[0.124]  |
| % aged 16-74 in managerial/prof occupations   | -0.108***<br>[0.039] | 0.273***<br>[0.096]  | -0.125<br>[0.110]    | -0.061<br>[0.041]   | 0.348***<br>[0.083]  | -0.136<br>[0.103]    |
| Index of Multiple Deprivation 2010 Squared    | -0.038<br>[0.028]    | 0.137**<br>[0.058]   | 0.051<br>[0.081]     | -0.011<br>[0.025]   | 0.180***<br>[0.056]  | 0.044<br>[0.073]     |
| Constant                                      | 6.615***<br>[0.382]  | 0.716<br>[0.736]     | 4.518***<br>[0.815]  | 6.605***<br>[0.361] | 0.700<br>[0.763]     | 4.520***<br>[0.811]  |
| Observations                                  | 150                  | 150                  | 150                  | 150                 | 150                  | 150                  |
| Robust standard errors in brackets            |                      |                      |                      |                     |                      |                      |
| *** p<0.01, ** p<0.05, * p<0.1                |                      |                      |                      |                     |                      |                      |



Table A2 Obtaining a preferred health outcome specification for social care, healthcare and public health expenditure, forward selection, first-stage results

|                                                  | (1)                     | (2)                     | (3)                     | (4)              | (5)                | (6)              |
|--------------------------------------------------|-------------------------|-------------------------|-------------------------|------------------|--------------------|------------------|
|                                                  | All causes              | All causes              | All causes              | All causes       | All causes         | All causes       |
|                                                  | 2013/14 PB spend        | 2013/14 G_SS spend      | 2013/14 PH spend        | 2013/14 PB spend | 2013/14 G_SS spend | 2013/14 PH spend |
|                                                  | SYLLR 2013/14/15        | SYLLR 2013/14/15        | SYLLR 2013/14/15        | SYLLR 2013/14/15 | SYLLR 2013/14/15   | SYLLR 2013/14/15 |
|                                                  | outcome model           | outcome model           | outcome model           | outcome model    | outcome model      | outcome model    |
|                                                  | first-stage             | first-stage             | first-stage             | first-stage      | first-stage        | first-stage      |
|                                                  | weighted                | weighted                | weighted                | weighted         | weighted           | weighted         |
|                                                  | OLS                     | OLS                     | OLS                     | OLS              | OLS                | OLS              |
|                                                  | 'initial' specification | 'initial' specification | 'initial' specification | specification 2  | specification 2    | specification 2  |
| VARIABLES                                        |                         |                         |                         |                  |                    |                  |
| DFT index, public health expenditure, 2013/14    | 0.004                   | 0.062                   | 0.716***                | 0.016            | 0.048              | 0.717***         |
|                                                  | [0.029]                 | [0.059]                 | [0.054]                 | [0.027]          | [0.063]            | [0.049]          |
| MFF, public health expenditure, 2013/14          | 0.032                   | 1.07                    | 0.375                   |                  |                    |                  |
|                                                  | [0.430]                 | [0.988]                 | [1.038]                 |                  |                    |                  |
| DFT index, NHS healthcare expenditure            | 0.444***                | 0.215                   | 0.530*                  | 0.460***         | 0.221              | 0.371            |
|                                                  | [0.144]                 | [0.342]                 | [0.286]                 | [0.140]          | [0.348]            | [0.256]          |
| Age index, prescribing cost formula              | 0.228***                | 0.246                   | -1.077***               | 0.220***         | 0.176              | -1.062***        |
|                                                  | [0.084]                 | [0.199]                 | [0.269]                 | [0.079]          | [0.194]            | [0.270]          |
| MFF, resource allocation HCHS formula            | -0.359                  | -1.523                  | -1.314                  |                  |                    |                  |
|                                                  | [0.482]                 | [1.074]                 | [1.213]                 |                  |                    |                  |
| Type of LA: London borough                       | 0.030                   | -0.090*                 | -0.003                  |                  |                    |                  |
|                                                  | [0.026]                 | [0.052]                 | [0.050]                 |                  |                    |                  |
| Type of LA: Metropolitan district                | 0.015                   | -0.105***               | 0.020                   | 0.016            | -0.070**           | 0.063**          |
|                                                  | [0.016]                 | [0.031]                 | [0.041]                 | [0.014]          | [0.028]            | [0.031]          |
| Type of LA: Unitary authority                    | 0.004                   | -0.029                  | 0.060*                  | 0.005            | -0.003             | 0.085***         |
|                                                  | [0.010]                 | [0.026]                 | [0.032]                 | [0.009]          | [0.025]            | [0.026]          |
| Area cost adj for older people's social services | 0.143                   | 0.718                   | 0.076                   |                  |                    |                  |
|                                                  | [0.254]                 | [0.626]                 | [0.460]                 |                  |                    |                  |
| Population sparsity measure                      | 0.843                   | -4.433*                 | -8.279***               | 1.319**          | -3.410             | -5.890***        |
|                                                  | [0.720]                 | [2.392]                 | [2.362]                 | [0.666]          | [2.354]            | [2.141]          |
| % households that are owner occupied             | -0.101*                 | -0.403***               | -0.211*                 | -0.102*          | -0.502***          | -0.209*          |
|                                                  | [0.053]                 | [0.107]                 | [0.123]                 | [0.052]          | [0.101]            | [0.121]          |
| % population aged 16-74 permanently sick         | 0.052*                  | 0.026                   | 0.519***                | 0.066***         | -0.014             | 0.567***         |
|                                                  | [0.029]                 | [0.073]                 | [0.067]                 | [0.024]          | [0.066]            | [0.064]          |
| % population providing unpaid care               | -0.086                  | 0.300                   | -0.180                  | -0.074           | 0.394*             | -0.107           |
|                                                  | [0.086]                 | [0.217]                 | [0.196]                 | [0.084]          | [0.215]            | [0.202]          |
| % population in white ethnic group               | 0.050*                  | 0.161**                 | 0.014                   | 0.041            | 0.248***           | 0.048            |
|                                                  | [0.028]                 | [0.062]                 | [0.070]                 | [0.027]          | [0.065]            | [0.060]          |
| Older adults: social service need per person     |                         |                         |                         |                  |                    |                  |
| Constant                                         | 6.962***                | -0.480                  | 4.991***                | 7.038***         | -0.434             | 5.291***         |
|                                                  | [0.158]                 | [0.403]                 | [0.367]                 | [0.150]          | [0.370]            | [0.382]          |
| Observations                                     | 150                     | 150                     | 150                     | 150              | 150                | 150              |
| Robust standard errors in brackets               |                         |                         |                         |                  |                    |                  |
| *** p<0.01, ** p<0.05, * p<0.1                   |                         |                         |                         |                  |                    |                  |

Table A2 continued

Obtaining a preferred health outcome specification for social care, healthcare and public health expenditure, forward selection, first-stage results

|                                                  | (7)                  | (8)                  | (9)                  | (10)                    | (11)                    | (12)                   |
|--------------------------------------------------|----------------------|----------------------|----------------------|-------------------------|-------------------------|------------------------|
|                                                  | All causes           | All causes           | All causes           | All causes              | All causes              | All causes             |
|                                                  | 2013/14 PB spend     | 2013/14 G_SS spend   | 2013/14 PH spend     | 2013/14 PB spend        | 2013/14 G_SS spend      | 2013/14 PH spend       |
|                                                  | SYLLR 2013/14/15     | SYLLR 2013/14/15     | SYLLR 2013/14/15     | SYLLR 2013/14/15        | SYLLR 2013/14/15        | SYLLR 2013/14/15       |
|                                                  | outcome model        | outcome model        | outcome model        | outcome model           | outcome model           | outcome model          |
|                                                  | first-stage          | first-stage          | first-stage          | first-stage             | first-stage             | first-stage            |
|                                                  | weighted             | weighted             | weighted             | weighted                | weighted                | weighted               |
|                                                  | OLS                  | OLS                  | OLS                  | OLS                     | OLS                     | OLS                    |
|                                                  | specification 3      | specification 3      | specification 3      | preferred specification | preferred specification | referred specification |
| VARIABLES                                        |                      |                      |                      |                         |                         |                        |
| DFT index, public health expenditure, 2013/14    | 0.012<br>[0.026]     | 0.057<br>[0.064]     | 0.734***<br>[0.057]  | 0.020<br>[0.026]        | 0.075<br>[0.061]        | 0.728***<br>[0.056]    |
| MFF, public health expenditure, 2013/14          |                      |                      |                      |                         |                         |                        |
| DFT index, NHS healthcare expenditure            | 0.413***<br>[0.132]  | 0.321<br>[0.351]     | 0.352<br>[0.285]     | 0.451***<br>[0.127]     | 0.291<br>[0.338]        | 0.255<br>[0.284]       |
| Age index, prescribing cost formula              | 0.266***<br>[0.072]  | 0.050<br>[0.210]     | -1.345***<br>[0.253] | 0.279***<br>[0.077]     | 0.212<br>[0.207]        | -1.279***<br>[0.257]   |
| MFF, resource allocation HCHS formula            |                      |                      |                      |                         |                         |                        |
| Type of LA: London borough                       |                      |                      |                      |                         |                         |                        |
| Type of LA: Metropolitan district                | 0.009<br>[0.012]     | -0.057**<br>[0.023]  | 0.039<br>[0.027]     | 0.004<br>[0.013]        | -0.080***<br>[0.023]    | 0.037<br>[0.026]       |
| Type of LA: Unitary authority                    |                      |                      |                      |                         |                         |                        |
| Area cost adj for older people's social services |                      |                      |                      |                         |                         |                        |
| Population sparsity measure                      |                      |                      |                      |                         |                         |                        |
| % households that are owner occupied             | -0.129***<br>[0.049] | -0.422***<br>[0.085] | 0.026<br>[0.100]     |                         |                         |                        |
| % population aged 16-74 permanently sick         | 0.056**<br>[0.024]   | 0.019<br>[0.045]     | 0.699***<br>[0.059]  | 0.069**<br>[0.029]      | -0.088<br>[0.062]       | 0.610***<br>[0.064]    |
| % population providing unpaid care               | -0.055<br>[0.088]    | 0.328*<br>[0.191]    | -0.372<br>[0.227]    | -0.158*<br>[0.085]      | 0.178<br>[0.191]        | -0.245<br>[0.212]      |
| % population in white ethnic group               | 0.048*<br>[0.026]    | 0.235***<br>[0.064]  | 0.064<br>[0.068]     | 0.047*<br>[0.026]       | 0.294***<br>[0.068]     | 0.100<br>[0.068]       |
| Older adults: social service need per person     |                      |                      |                      | 0.068<br>[0.058]        | 0.583***<br>[0.113]     | 0.193<br>[0.120]       |
| Constant                                         | 7.052***<br>[0.154]  | -0.473<br>[0.361]    | 5.208***<br>[0.421]  | 6.925***<br>[0.152]     | -0.914**<br>[0.360]     | 5.218***<br>[0.423]    |
| Observations                                     | 150                  | 150                  | 150                  | 150                     | 150                     | 150                    |
| Robust standard errors in brackets               |                      |                      |                      |                         |                         |                        |
| *** p<0.01, ** p<0.05, * p<0.1                   |                      |                      |                      |                         |                         |                        |

STROBE Statement—Checklist of items that should be included in reports of *cross-sectional studies*

|                              | Item No | Recommendation                                                                                                                                                                                    | Page No     |
|------------------------------|---------|---------------------------------------------------------------------------------------------------------------------------------------------------------------------------------------------------|-------------|
| <b>Title and abstract</b>    | 1       | (a) Indicate the study's design with a commonly used term in the title or the abstract                                                                                                            | 1, 4        |
|                              |         | (b) Provide in the abstract an informative and balanced summary of what was done and what was found                                                                                               | 4           |
| <b>Introduction</b>          |         |                                                                                                                                                                                                   |             |
| Background/rationale         | 2       | Explain the scientific background and rationale for the investigation being reported                                                                                                              | 6           |
| Objectives                   | 3       | State specific objectives, including any prespecified hypotheses                                                                                                                                  | 4, 6        |
| <b>Methods</b>               |         |                                                                                                                                                                                                   |             |
| Study design                 | 4       | Present key elements of study design early in the paper                                                                                                                                           | 6-7         |
| Setting                      | 5       | Describe the setting, locations, and relevant dates, including periods of recruitment, exposure, follow-up, and data collection                                                                   | 6-7         |
| Participants                 | 6       | (a) Give the eligibility criteria, and the sources and methods of selection of participants                                                                                                       | 6           |
| Variables                    | 7       | Clearly define all outcomes, exposures, predictors, potential confounders, and effect modifiers. Give diagnostic criteria, if applicable                                                          | 8-13        |
| Data sources/<br>measurement | 8*      | For each variable of interest, give sources of data and details of methods of assessment (measurement). Describe comparability of assessment methods if there is more than one group              | 8-13        |
| Bias                         | 9       | Describe any efforts to address potential sources of bias                                                                                                                                         | 8-12        |
| Study size                   | 10      | Explain how the study size was arrived at                                                                                                                                                         | 12-13       |
| Quantitative variables       | 11      | Explain how quantitative variables were handled in the analyses. If applicable, describe which groupings were chosen and why                                                                      | 8-13        |
| Statistical methods          | 12      | (a) Describe all statistical methods, including those used to control for confounding                                                                                                             | 8-12, Fig 1 |
|                              |         | (b) Describe any methods used to examine subgroups and interactions                                                                                                                               | None        |
|                              |         | (c) Explain how missing data were addressed                                                                                                                                                       | n/a         |
|                              |         | (d) If applicable, describe analytical methods taking account of sampling strategy                                                                                                                |             |
|                              |         | (e) Describe any sensitivity analyses                                                                                                                                                             | n/a         |
| <b>Results</b>               |         |                                                                                                                                                                                                   |             |
| Participants                 | 13*     | (a) Report numbers of individuals at each stage of study—eg numbers potentially eligible, examined for eligibility, confirmed eligible, included in the study, completing follow-up, and analysed | Table 1     |
|                              |         | (b) Give reasons for non-participation at each stage                                                                                                                                              | n/a         |
|                              |         | (c) Consider use of a flow diagram                                                                                                                                                                | n/a         |
| Descriptive data             | 14*     | (a) Give characteristics of study participants (eg demographic, clinical, social) and information on exposures and potential confounders                                                          | Table 1     |
|                              |         | (b) Indicate number of participants with missing data for each variable of interest                                                                                                               | Table 1     |
| Outcome data                 | 15*     | Report numbers of outcome events or summary measures                                                                                                                                              | Table 1     |

|                                                                                                          |                          |    |                                                                                                                                                                                                              |                      |
|----------------------------------------------------------------------------------------------------------|--------------------------|----|--------------------------------------------------------------------------------------------------------------------------------------------------------------------------------------------------------------|----------------------|
| 1<br>2<br>3<br>4<br>5<br>6<br>7<br>8<br>9<br>10<br>11                                                    | Main results             | 16 | (a) Give unadjusted estimates and, if applicable, confounder-adjusted estimates and their precision (eg, 95% confidence interval). Make clear which confounders were adjusted for and why they were included | Tables 2, 3, & 4     |
| 12<br>13<br>14<br>15                                                                                     |                          |    | (b) Report category boundaries when continuous variables were categorized                                                                                                                                    | n/a                  |
| 16<br>17<br>18<br>19<br>20<br>21<br>22                                                                   |                          |    | (c) If relevant, consider translating estimates of relative risk into absolute risk for a meaningful time period                                                                                             | n/a                  |
| 23<br>24<br>25<br>26<br>27                                                                               | Other analyses           | 17 | Report other analyses done—eg analyses of subgroups and interactions, and sensitivity analyses                                                                                                               | Cf Table 2 & Table 3 |
| 28                                                                                                       | <b>Discussion</b>        |    |                                                                                                                                                                                                              |                      |
| 29<br>30<br>31<br>32                                                                                     | Key results              | 18 | Summarise key results with reference to study objectives                                                                                                                                                     | Table 4              |
| 33<br>34<br>35<br>36                                                                                     | Limitations              | 19 | Discuss limitations of the study, taking into account sources of potential bias or imprecision. Discuss both direction and magnitude of any potential bias                                                   | 16-17                |
| 37<br>38<br>39<br>40<br>41<br>42                                                                         | Interpretation           | 20 | Give a cautious overall interpretation of results considering objectives, limitations, multiplicity of analyses, results from similar studies, and other relevant evidence                                   | 14-16                |
| 43<br>44<br>45<br>46<br>47<br>48<br>49<br>50<br>51<br>52<br>53<br>54<br>55<br>56<br>57<br>58<br>59<br>60 | Generalisability         | 21 | Discuss the generalisability (external validity) of the study results                                                                                                                                        | 16-17                |
|                                                                                                          | <b>Other information</b> |    |                                                                                                                                                                                                              |                      |
|                                                                                                          | Funding                  | 22 | Give the source of funding and the role of the funders for the present study and, if applicable, for the original study on which the present article is based                                                | 2                    |

\*Give information separately for exposed and unexposed groups.

**Note:** An Explanation and Elaboration article discusses each checklist item and gives methodological background and published examples of transparent reporting. The STROBE checklist is best used in conjunction with this article (freely available on the Web sites of PLoS Medicine at <http://www.plosmedicine.org/>, Annals of Internal Medicine at <http://www.annals.org/>, and Epidemiology at <http://www.epidem.com/>). Information on the STROBE Initiative is available at [www.strobe-statement.org](http://www.strobe-statement.org).

# BMJ Open

## The causal impact of social care, public health and healthcare expenditure on mortality in England: cross-sectional evidence for 2013/14

|                                 |                                                                                                                                                                                                                                                                                                                    |
|---------------------------------|--------------------------------------------------------------------------------------------------------------------------------------------------------------------------------------------------------------------------------------------------------------------------------------------------------------------|
| Journal:                        | <i>BMJ Open</i>                                                                                                                                                                                                                                                                                                    |
| Manuscript ID                   | bmjopen-2020-046417.R2                                                                                                                                                                                                                                                                                             |
| Article Type:                   | Original research                                                                                                                                                                                                                                                                                                  |
| Date Submitted by the Author:   | 12-Jul-2021                                                                                                                                                                                                                                                                                                        |
| Complete List of Authors:       | Martin, Stephen; University of York Department of Economics and Related Studies,<br>Longo, Francesco; University of York, Centre for Health Economics<br>Lomas, James; University of York, Centre for Health Economics<br>Claxton, Karl; University of York, Centre for Health Economics & Department of Economics |
| <b>Primary Subject Heading</b>: | Health economics                                                                                                                                                                                                                                                                                                   |
| Secondary Subject Heading:      | Health policy, Public health                                                                                                                                                                                                                                                                                       |
| Keywords:                       | HEALTH ECONOMICS, Health policy < HEALTH SERVICES ADMINISTRATION & MANAGEMENT, STATISTICS & RESEARCH METHODS                                                                                                                                                                                                       |
|                                 |                                                                                                                                                                                                                                                                                                                    |

SCHOLARONE™  
Manuscripts



I, the Submitting Author has the right to grant and does grant on behalf of all authors of the Work (as defined in the below author licence), an exclusive licence and/or a non-exclusive licence for contributions from authors who are: i) UK Crown employees; ii) where BMJ has agreed a CC-BY licence shall apply, and/or iii) in accordance with the terms applicable for US Federal Government officers or employees acting as part of their official duties; on a worldwide, perpetual, irrevocable, royalty-free basis to BMJ Publishing Group Ltd ("BMJ") its licensees and where the relevant Journal is co-owned by BMJ to the co-owners of the Journal, to publish the Work in this journal and any other BMJ products and to exploit all rights, as set out in our [licence](#).

The Submitting Author accepts and understands that any supply made under these terms is made by BMJ to the Submitting Author unless you are acting as an employee on behalf of your employer or a postgraduate student of an affiliated institution which is paying any applicable article publishing charge ("APC") for Open Access articles. Where the Submitting Author wishes to make the Work available on an Open Access basis (and intends to pay the relevant APC), the terms of reuse of such Open Access shall be governed by a Creative Commons licence – details of these licences and which [Creative Commons](#) licence will apply to this Work are set out in our licence referred to above.

Other than as permitted in any relevant BMJ Author's Self Archiving Policies, I confirm this Work has not been accepted for publication elsewhere, is not being considered for publication elsewhere and does not duplicate material already published. I confirm all authors consent to publication of this Work and authorise the granting of this licence.

1  
2  
3 **The causal impact of social care, public health and healthcare expenditure**  
4 **on mortality in England: cross-sectional evidence for 2013/14**  
5  
6  
7  
8  
9

10 Author/position/address

11 Dr Stephen Martin

12 Research Fellow, Department of Economics, University of York, York, YO10 5DD.  
13  
14

15 Dr Francesco Longo

16 Research Fellow, Centre for Health Economics, University of York, York, YO10 5DD.  
17  
18

19 Dr James Lomas

20 Research Fellow, Centre for Health Economics, University of York, York, YO10 5DD.  
21  
22

23 Dr Karl Claxton

24 Professor, Department of Economics & Centre for Health Economics, University of York,  
25 York, YO10 5DD.  
26  
27  
28

29 Corresponding author and email address

30 Dr Stephen Martin Email: [sdm1@york.ac.uk](mailto:sdm1@york.ac.uk)  
31  
32

33 Copyright statement

34 The Corresponding Author has the right to grant on behalf of all authors and does grant on  
35 behalf of all authors, an exclusive licence (or non-exclusive for government employees) on a  
36 worldwide basis to the BMJ Publishing Group Ltd to permit this article (if accepted) to be  
37 published in BMJ editions and any other BMJ PGL products and sub-licences such use and  
38 exploit all subsidiary rights, as set out in our licence.  
39  
40  
41

42 Transparency declaration

43 The lead author (the manuscript's guarantor) affirms that the manuscript is an honest,  
44 accurate, and transparent account of the study being reported; that no important aspects of the  
45 study have been omitted; and that any discrepancies from the study as planned have been  
46 explained.  
47  
48  
49

50 Details of ethical approval

51 Ethical approval was not required because neither human participants nor animals were  
52 involved in the study.  
53  
54

55 Details of the role of the study sponsors

56 The views expressed in this publication are those of the authors and not necessarily those of  
57 the NHS, the National Institute for Health Research or the Department of Health and Social  
58 Care (DHSC).  
59  
60

1  
2  
3  
4  
5 Statement of independence of researchers from funders

6 Although funded by the funded by the National Institute for Health Research Policy Research  
7 Programme, neither the NIHR nor the DHSC had any influence on the study design, the way  
8 in which the research was undertaken, or the results.  
9

10  
11 Acknowledgements

12 We should like to thank NHS Digital for supplying the mortality data. We should also like to  
13 acknowledge the assistance received from various individuals including Michael Chaplin at  
14 the Department of Health and Social Care. In addition, we should like to acknowledge the  
15 comments received from various individuals at the Department of Health and Social Care and  
16 NHS England on an earlier version of this paper. Their suggestions have substantially  
17 improved the final version.  
18  
19  
20

21  
22 Word count

23 The text consists of 5,899 words. There are four tables in this document. There is one figure  
24 in a separate file.  
25  
26  
27  
28  
29  
30  
31  
32  
33  
34  
35  
36  
37  
38  
39  
40  
41  
42  
43  
44  
45  
46  
47  
48  
49  
50  
51  
52  
53  
54  
55  
56  
57  
58  
59  
60



# The causal impact of social care, public health and healthcare expenditure on mortality in England: cross-sectional evidence for 2013/14

## Abstract

### *Objectives*

The first objective is to estimate the joint impact of social care, public health and healthcare expenditure on mortality in England. The second objective is to use these results to estimate the impact of spending constraints in 2010/11 – 2014/15 on total mortality.

### *Methods*

The impact of social care, healthcare and public health expenditure on mortality is analysed by applying the two-stage least squares method to local authority data for 2013/14. Next, we compare the growth in healthcare and social care expenditure pre- and post-2010. We use the difference between these growth rates and the responsiveness of mortality to changes in expenditure taken from the 2013/14 cross-sectional analysis to estimate the additional mortality generated by post-2010 spending constraints.

### *Results*

Our most conservative results suggest that: (i) a 1% increase in healthcare expenditure reduces mortality by 0.532%; (ii) a 1% increase in social care expenditure reduces mortality by 0.336%; and (iii) a 1% increase in local public health spending reduces mortality by 0.019%. Using the first two of these elasticities and data on the change in spending growth between 2001/02 - 2009/10 and 2010/11 – 2014/15, we find that there were 57,550 [CI: 3,075-111,955] more deaths in the latter period than would have been observed had spending growth during this period matched that in 2001/02 - 2009/10.

### *Conclusions*

All three forms of public healthcare-related expenditure save lives and there is evidence that additional social care expenditure is more than twice as productive as additional healthcare expenditure. Our results are consistent with the hypothesis that the slowdown in the rate of improvement in life expectancy in England and Wales since 2010 is attributable to spending constraints in the healthcare and social care sectors.

### Strengths and limitations of this study

- Cross-sectional analysis of the causal impact of social care, healthcare and public health expenditure on mortality.
- Two-stage least squares regression allows for the endogenous nature of all three types of expenditure.
- Controls for the need for healthcare-related expenditure are also included.
- We compare the growth in healthcare and social care expenditure pre- and post-2010. We find that there were 57,550 more deaths in the latter period than would have been observed had spending growth during this period matched that in the earlier period.
- The responsiveness of mortality to changes in health-related expenditure in 2013/14 may not hold in other years and there may be other factors affecting mortality beyond those included in this study.

# The causal impact of social care, public health and healthcare expenditure on mortality in England: cross-sectional evidence for 2013/14

## 1. Introduction

The rate of improvement in life expectancy in England and Wales has slowed markedly since 2010.<sup>1 2 3</sup> This decline has been most marked for women aged over 85 years and these people tend to be the most physically frail and/or disadvantaged.<sup>4</sup> It has also been noted that the very elderly tend to be the most dependent on a well-functioning publicly-funded health and social care system.<sup>5</sup> As the slowdown in life expectancy growth has coincided with the imposition of government spending constraints, it has been hypothesised that these constraints are the major cause of the stalled improvement in life expectancy.<sup>6 7</sup>

A recent study assembled annual data on healthcare and social care spending for England from 2001 to 2014 to estimate the impact of the UK government's spending constraints on mortality.<sup>8</sup> Time trend analysis was used to compare the actual mortality rate between 2011 and 2014 with the expected counterfactual rate based on the trend before the imposition of budgetary restrictions in 2010. The study found that spending constraints between 2010 and 2014 were associated with an estimated 45,000 more deaths than would have been expected based on pre-2010 trends.<sup>8</sup>

This finding has generated considerable controversy and merits further investigation. We approach the same issue but from a very different perspective. Instead of extrapolating historic trends at the national level, we use two stage least squares (instrumental variable) regression to estimate the causal relationship between spending and mortality across local authorities at a single point in time (2013/14). Like the time trend study, we consider the impact of both healthcare and social care expenditure on mortality, but we also control for the impact of public health expenditure.

There are few English studies of the impact of healthcare on mortality, and even fewer of the joint impact of healthcare and public health expenditure on mortality.<sup>9 10</sup> The social care literature has concentrated on the impact of expenditure on the quality of life rather than on

1  
2  
3 mortality.<sup>11</sup> Other studies focus on the relationship between the public social care and  
4 healthcare sectors. They find a substitution effect between social care and healthcare services  
5 so that an increase in social care services may improve hospital outcomes, for example, by  
6 reducing delayed discharges.<sup>12 13 14 15</sup> However, we are not aware of any English studies of  
7 the joint impact of social care, healthcare, and public health expenditure on mortality, and  
8 hence this study presents the first such estimates. We combine these estimates with  
9 information about the size of the post-2010 spending constraints to provide an alternative  
10 estimate of how many lives such constraints cost between 2011 and 2014.  
11  
12  
13  
14  
15  
16  
17  
18

19 A recent American study looked at the association between healthcare/social service  
20 expenditure and health outcomes across the states for the period 2000-2009.<sup>16</sup> This concluded  
21 that debates about how much should be invested in healthcare should also consider how much  
22 is invested in social services. We build on this work in two ways so that we are able to  
23 provide more precise guidance for English policymakers. First, the American study defined  
24 social service expenditure as comprising public expenditure on all services (such as  
25 education, transportation and public safety) that address the social determinants of health.  
26 Instead we focus on definitions of healthcare and adult social care expenditure as they reflect  
27 the different budgets allocated by central government to different public bodies in England.  
28 Secondly, by adopting this approach we are also able to estimate the size of the causal impact  
29 of this and other types of healthcare-related expenditure on mortality rather than examining  
30 observed associations. Such causal estimates can start to inform a range of decisions about  
31 the scale and allocation of public expenditure made by public bodies and central government.  
32  
33  
34  
35  
36  
37  
38  
39  
40  
41  
42  
43

44 The plan of this paper is as follows. Section 2 describes the institutional arrangements  
45 associated with the three types of health-related expenditure that are the focus of this study.  
46 Section 3 describes the health outcome equation to be estimated and how we address the  
47 issue of reverse causation (i.e., that mortality may affect expenditure as well as vice versa).  
48 Section 4 describes our estimation approach and section 5 presents brief details of the dataset.  
49 Section 6 presents our results and there is a discussion of them in section 7.  
50  
51  
52  
53  
54  
55  
56

## 57 **2. Institutional arrangements for health-related expenditure in England in 2013/14**

58  
59  
60

### *Social care*

Adults with a physical disability, a learning disability, or a physical or mental illness often have difficulty with routine daily activities such as washing, dressing, cooking, and shopping. Such individuals are usually supported in two main ways: either formally through services that they or their local authority pay for; and/or informally by family, friends, or neighbours.<sup>17</sup> In England, social care expenditure funds residential and nursing home placements, social care in the community to aid daily living, short-term care (e.g. vision rehabilitation and other reablement services to improve independence), equipment and domestic adaptations, and information provision. Public spending on other services addressing the social determinants of health (such as housing, income support, sanitation, transport, etc) is not included in our measure of social care expenditure.

Funding for local authorities (LAs) comes from three major sources: the local council tax, central government grants, and local business rates. The size of the central government grant will reflect the LA's relative need for expenditure and its income raising capability. LAs have extensive statutory responsibilities in the area of adult social care and they apply national criteria to assess whether people's needs are eligible for LA-funded social care. These national criteria were introduced by the Care Act (2014), and reduced the variation in the eligibility for LA-funded social care between local areas. Before the introduction of the Care Act, local authorities were able to set their own thresholds for the need for social care based on the criteria set out in the Fair Access to Care Services framework.<sup>18</sup> Even if eligible for LA-funded social care, the provision of such funding is means-tested so that, depending on a person's financial situation, they may be asked to contribute to some or all of their social care costs.<sup>17</sup>

Care needs are often multiple and interrelated with other needs. Adult social care is therefore part of a complex system of related public services and forms of support. Since 2010 spending constraints imposed by central government may have had some unfortunate effects on allied public services. For example, there is the long-standing argument that inadequate social care provision may be responsible for the delayed discharge of elderly patients from hospital, and that inadequate care in the community may contribute to the growth in emergency hospital admissions.<sup>19 20</sup> Moreover, inadequate social care provision may be associated with an increase in mortality. Although social care is primarily concerned with improving the quality of life, it is perfectly plausible that social care extends life and that

1  
2  
3 those with care needs enjoy both a lower mortality rate and a better quality of life in those  
4 LAs with more generous social care provision.  
5  
6  
7

### 8 *Public health*

10 Consideration of social care expenditure in isolation is slightly problematic because, since  
11 April 2013, LAs have also been responsible for local public health services. Each 'unitary'  
12 or upper tier local authority receives a fixed annual budget, ring-fenced for public health  
13 activities.<sup>21</sup> For a few services there may be scope to use either the social care or the public  
14 health budget and so, when studying the impact of social care expenditure, it may be wise to  
15 control for expenditure on local public health services. And of course, public health  
16 expenditure will have a direct effect on mortality. Local public health activities accounted  
17 for over £2,500mn of expenditure in 2013/14 and included services related to substance  
18 misuse (roughly one quarter of expenditure), sexual health (roughly one third of expenditure),  
19 children's health (about 10%) and tobacco control (about 5%). Expenditure on national  
20 public health programmes is excluded from the analysis because no breakdown of this  
21 expenditure by locality is available.<sup>22</sup>  
22  
23  
24  
25  
26  
27  
28  
29  
30  
31

### 32 *Healthcare in England*

34 English National Health Service (NHS) healthcare expenditure was managed by 212 Clinical  
35 Commissioning Groups (CCGs) in 2013/14.<sup>23</sup> These local health authorities were each  
36 allocated a fixed annual budget and this was determined centrally in a similar manner to how  
37 each LA was assigned its budget for local public health responsibilities. These budgets were  
38 used by CCGs to fund expenditure on various types of care including inpatient, outpatient  
39 and community care, and pharmaceutical prescriptions. It is worth noting that CCGs did not  
40 have responsibility for either primary care or specialised commissioning in the study year  
41 (2013/14). These were administered centrally and expenditure on these items has been  
42 excluded from the study because data are not available by local area.  
43  
44  
45  
46  
47  
48  
49  
50  
51  
52

## 53 **3. Methods: the estimating equation and the selection of instruments for expenditure**

### 54 *The estimated health outcome equation*

55  
56  
57  
58  
59  
60

We adapt the usual health outcome equation to estimate the joint impact of social care, public health and healthcare expenditure on mortality across English local authorities in 2013/14.

We estimate:

$$\text{mortality rate}_i = f [\text{healthcare expenditure}_i, \text{public health expenditure}_i, \text{social care expenditure}_i] + \text{controls for need}_i + e_i \quad (1)$$

The control variables reflect the need for health-related expenditure in authority  $i$ , and  $e$  reflects everything not included elsewhere in the specification.<sup>9</sup> Quantifying the impact of these categories of expenditure on mortality is challenging for two reasons: first, there might be some reverse causation with historical outcomes (eg mortality) influencing the current level of budget/expenditure; and second, there might be some unobserved factor that is driving both expenditure and mortality.

As an illustration of the reverse causation issue consider figure 1. The box defines the structural model in which the mortality rate depends on social care expenditure and controls for need (we have omitted healthcare and public health expenditure from the figure for simplicity but the same illustration could also be used for these two other types of health-related expenditure). In Figure 1a, social care expenditure both affects mortality and is affected by (historical) mortality. This reverse causation links expenditure and the error term, and this makes the ordinary least squares (OLS) estimator both biased and inconsistent.

Insert Figure 1 near here

The solution to this problem is to find variables (known as ‘instruments’) that are good predictors of expenditure but which have no direct impact on mortality and are unaffected by unobserved factors. These instruments lie outside the box in figure 1b because they do not belong in the structural model. They are used in a regression model to predict the level of expenditure that is not influenced by either historical mortality or unobserved factors (this is the first stage of the two-stage least squares approach). Having severed the link with unobserved factors and mortality, the predicted level of expenditure is then used in another regression model to examine the causal impact of (predicted) expenditure on mortality (this is the second stage of the two-stage least squares approach (2SLS)).

1  
2  
3 A recent study of the impact of healthcare expenditure suggested using components of the  
4 formulae used to distribute funding across health authorities as instruments for healthcare  
5 expenditure.<sup>24</sup> We apply this approach to identification here because the distribution of  
6 funding for all three types of health-related expenditure is informed by various centrally  
7 determined resource allocation formulae.  
8  
9  
10  
11  
12

### 13 *Instruments for social care expenditure*

14  
15 In the study year (2013/14) each LA received a grant from central government that reflected  
16 its relative need for expenditure on a variety of services for which it was responsible. Each  
17 service area had its own relative needs formula (RNF) that contributed to its overall relative  
18 need, but LAs were free to decide how much to spend in each service area (subject to meeting  
19 their statutory obligations). Adult social care had two relative needs formulae: one for people  
20 aged 18-64, and another for those aged over 65. The relative needs formula for the older  
21 people's social care included a basic amount per client with top-ups for age, deprivation, low  
22 income, low population density (because this increases service delivery costs) and local input  
23 prices (in some areas, such as London, labour costs will be higher than elsewhere).<sup>25</sup> As any  
24 instrument should be well correlated with expenditure but not directly correlated with  
25 mortality, we use the sparsity and input price adjustment variables from the older person's  
26 relative needs formula as instruments for (predictors of) social care expenditure.  
27  
28  
29  
30  
31  
32  
33  
34  
35  
36  
37

38 A study of the impact of LA expenditure on home care services approached the instrument  
39 issue from a different perspective.<sup>26</sup> It claimed that social care expenditure will reflect the  
40 service eligibility policy employed by different LAs and that 'the innate culture and  
41 perspective of the council...will drive the generosity of policies more than small differences  
42 in the health of the population'. The researchers proposed the use of a set of four dummy  
43 variables reflecting the type of LA (Shire, Unitary, Metropolitan, London) as instruments on  
44 the assumption that 'similar' LAs will have 'similar' eligibility policies and expenditure  
45 levels.<sup>26</sup>  
46  
47  
48  
49  
50  
51  
52

53 Finally, we note that LA-funded social care is means tested and, for example, owner  
54 occupiers who go into care homes are expected to sell their home to fund their care but that  
55 those in rented accommodation have their care costs paid for by the LA. This suggests that  
56 the proportion of households that are owner occupied in an area may serve as an instrument  
57 for LA social care expenditure (given appropriate controls for health-related need).  
58  
59  
60



Together, the funding rule, the type of LA, and the owner-occupied household variables provide seven potential instruments for social care expenditure.

#### *Instruments for healthcare expenditure*

For our study year (2013/14), each local health authority (212 CCGs) was assigned a fixed share of the national budget (£65bn) by the Department of Health within which they were supposed to meet expenditure on most types of healthcare except primary care, specialised commissioning and public health. With a little simplification, the budget available to each CCG can be expressed as

$$\begin{aligned} \text{local CCG budget per person} = & (\text{national budget per person}) \times \\ & (\text{local age index}) \times \\ & (\text{local additional needs index}) \times \\ & (\text{local input price index}) \times \\ & (\text{local DFT Index}) \end{aligned} \quad (2)$$

where: (i) the age index reflects the demographic profile of the local population; (ii) the additional needs index reflects local deprivation and other factors likely to influence the need for health care and includes a measure of historical mortality; (iii) the input price index (the Market Forces Factor (MFF)) reflects prices in the local health economy; and (iv) the distance from target (DFT) index reflects how far each health authority's actual budget allocation is from its target allocation.<sup>24</sup>

Because the additional needs index contains historical mortality, it is clear that reverse causality is an issue and that this (additional needs) index cannot constitute a plausible instrument for expenditure. However, the other indices provide suitable instruments for CCG expenditure. Further details about these instruments are in appendix A1 but, in summary, these funding rule variables are: (i) the DFT index for the total allocation; (ii) the Market Forces Factor for the Hospital and Community Health Services (HCHS) component of the total allocation; and (iii) the age index from the cost of prescribing pharmaceuticals component of the total allocation.

#### *Instruments for public health expenditure*

1  
2  
3 We instrument the public health expenditure variable using a similar approach to both  
4 healthcare and social care expenditure. The resource allocation formula for the public health  
5 grant to local authorities has a similar structure to the CCG grant (as outlined in equation (2))  
6 and we use two of the four local adjustment factors for the public health grant (the MFF and  
7 the DFT) as instruments for public health expenditure. Further details about these  
8 instruments are in appendix A2.  
9  
10  
11  
12  
13  
14

#### 15 *Are the selected instruments plausible and strong?*

16 For 2SLS to generate consistent estimates of the impact of expenditure on mortality, certain  
17 assumptions have to be met. First, the instruments should be good predictors of the  
18 expenditure variable. The usual test for good ('strong') instruments is that the F statistic  
19 associated with the instrument(s) in the first-stage regression should be about 10 or better,  
20 and hence we report the Sanderson-Windmeijer F test statistic for all first-stage estimations.<sup>27</sup>  
21 The second assumption is that any instrument for expenditure has no direct effect on  
22 mortality other than via its effect on expenditure, and that the instrument should be  
23 uncorrelated with unobserved determinants of expenditure and mortality (this is the validity  
24 assumption).  
25  
26  
27  
28  
29  
30  
31  
32  
33

34 Studies that use instrumental variable regression usually contain a discussion about why the  
35 researchers believe that such instruments are likely to be valid. This discussion for the  
36 present study can be found in appendix A3. In addition, the instrument validity assumption  
37 can be tested empirically and hence, where possible, we report the Hansen-Sargan test  
38 statistic of instrument validity for the second-stage equations.<sup>28</sup>  
39  
40  
41  
42  
43  
44  
45  
46

#### 47 **4. Methods: estimation approach**

48  
49 The estimation of equation (1) is complicated by the fact that theory provides little guidance  
50 as to the identity of the appropriate controls for need. Hence, following previous studies, we  
51 identify a dozen socio-economic variables -- such as the proportion of the population of  
52 working age employed in managerial/professional occupations -- as potential controls for the  
53 need for healthcare/public health/social care expenditure.<sup>9 10</sup>  
54  
55  
56  
57  
58  
59  
60

1  
2  
3 We also have a dozen instruments. There are four ‘type of LA’ dummy variables, two  
4 variables from the relative need formula for social care, and a measure of the local owner-  
5 occupation rate for social care expenditure. We also have two potential instruments for  
6 public health expenditure (the DFT index and the input price index) from its resource  
7 allocation formula. Finally, we have three potential instruments (the DFT index, the input  
8 price index and the age index) for healthcare expenditure from the resource allocation  
9 formula for healthcare budgets.

10  
11  
12 Ideally, we would like a more parsimonious set of controls (to reduce multi-collinearity  
13 problems) and a more parsimonious set of instruments (to minimise problems with weak  
14 instruments). To achieve these goals, we first estimate a health outcome equation using OLS  
15 with all controls and all three types of expenditure included. The least significant control is  
16 removed from the specification and the equation is re-estimated. This process – of dropping  
17 the least significant regressor and re-estimating – continues until there are only significant  
18 controls remaining (the expenditure variables are forced to be ever-present). Having  
19 identified potentially relevant covariates, these controls are then included in a two-stage least  
20 squares specification and a process similar to backward selection is used to eliminate  
21 problematic (invalid and/or weak) instruments.

22  
23  
24 As a sensitivity analysis we repeat the above analysis but use forward rather than backward  
25 selection to identify a parsimonious set of controls.

26  
27  
28 When estimating regressions, the values for all variables are logged so that regression  
29 coefficients can be interpreted as elasticities (for example, the coefficient on an expenditure  
30 variable reflects the impact on mortality of a 1% change in the value of the expenditure  
31 variable). All observations are weighted by the size of local authority’s population.  
32 Estimation is undertaken using the *Stata ivreg2* program.<sup>28</sup> In addition to the weak  
33 instrument and instrument validity tests mentioned above, we also report a test for whether  
34 the expenditure variables are endogenous and a reset test (Pesaran-Taylor) for model mis-  
35 specification.<sup>29</sup>

### 36 37 38 *Patient and public involvement*

39  
40  
41 Neither patients nor the public were involved in the design, or conduct, or reporting, or  
42 dissemination of our research.

## 5. Data

We use the gross current expenditure on adult social services by each local authority in 2013/14 as our measure of social service expenditure.<sup>22</sup> This measure excludes capital charges and, to avoid any double counting issues, it also excludes income from joint commissioning arrangements and income from the NHS. However, it includes income from locally determined (and means tested) client contributions towards their LA care package. This expenditure figure is divided by the LA population size to generate a per capita expenditure figure. As Table 1 shows, the average spend by LA is £307 per person although there is considerable variation in expenditure across the country: for example, social service expenditure ranges from £209 per person in Barnsley to £404 in Camden and £660 in the City of London.

Healthcare expenditure data is available from each CCG's programme budgeting return.<sup>30</sup> These are converted to a local authority basis using a mapping that translates population levels in mid-2012 from (parts of) CCGs to LAs. The average LA healthcare spend was £1,152 per person in 2013/14. Public health expenditure data is available from the local authority revenue expenditure and financing document for 2013/14.<sup>22</sup> The average public health spend for this year was £53 per person. Total healthcare expenditure (£65bn) is about four times the size of social service expenditure (£17bn), and the latter is six times the size of public health expenditure (£2.5bn).

Descriptive statistics for all of the variables employed in the study are in Table 1. The mortality indicator is the years of life lost per 100,000 people for deaths under age 75. The mean rate across all LAs is 443 years but this varies considerably, ranging from 268 years (in the City of London) to 776 years (in Blackpool). There is also considerable variation in the socio-economic control variables (largely constructed using population census data for 2011). For example, on average 84% of the population is in the white ethnic group but the average masks considerable variation, from 29% in Newham (London) to almost 99% in Cumbria, in Redcar & Cleveland, and in the Isles of Scilly.

1  
2  
3 Finally, descriptive statistics for the instruments for each type of expenditure are at the  
4 bottom of Table 1. Some reveal considerable variation around the country (eg the input price  
5 index for older people's social services) but others do not (eg the impact of population  
6 sparsity on the measure of costs).  
7  
8  
9

## 10 11 12 13 14 **6. Results**

### 15 16 17 *Backward selection*

18  
19 We begin by estimating an OLS specification that includes all 14 controls for the need for  
20 health-related expenditure. Of the 14 controls only six are significant at the 5% level and this  
21 result is in column 1 of Table 2. Application of the backward selection process described  
22 above reveals a more parsimonious set of controls (column 2). If these are included in an IV  
23 specification with all 12 potential instruments, we obtain the result shown in column 3. The  
24 statistical tests reported at the foot of Table 2 suggest that the instrument set associated with  
25 the column 3 result is both invalid (the Hansen-Sargan test statistic is significant) and weak  
26 (only one of the Sanderson-Windmeijer test statistics (for public health expenditure) is about  
27 ten or better). The three first-stage equations used to predict healthcare, social care and  
28 public health expenditure are in columns 1 to 3 respectively of Table A1 in appendix A4.  
29  
30  
31  
32  
33  
34  
35  
36

37  
38 In an attempt to identify which of the instruments are invalid (and hence should not be used),  
39 we re-estimated the specification shown in column 3 of table 2 adding one instrument at a  
40 time to the set of second-stage controls. This process suggests that three instruments (the two  
41 MFF indices and the London local authority dummy) are invalid and re-estimation without  
42 these yields the result shown in column 4 of table 2. As expected, the Hansen-Sargan test  
43 statistic has improved considerably but there is still a weak instrument issue for social service  
44 expenditure (the Sanderson-Windmeijer F-statistic is only 4.875). The equation used to  
45 predict social service expenditure is in column 5 of table A1 in appendix A4 and this has  
46 three insignificant instruments (the unitary authority dummy, the area cost adjustment  
47 variable and the sparsity measure). If we re-estimate without these instruments we obtain the  
48 second-stage result shown in column 5 of table 2. The Sanderson-Windmeijer test statistics  
49 improve but the Pesaran-Taylor reset test statistic suggests that there is some mis-  
50  
51  
52  
53  
54  
55  
56  
57  
58  
59  
60

1  
2  
3 specification. The addition of the squared value of the IMD 2010 resolves reset test issue and  
4 generates the result shown in column 6.  
5  
6  
7

8 Finally, the Sanderson-Windmeijer test statistic for the instruments for social care  
9 expenditure moves above the 'rule of thumb' critical value of ten if the least significant  
10 instrument for this variable (the proportion of households that are owner occupied  
11 households) is deleted from the specification. This result is in column 7 of table 2 (the  
12 corresponding first-stage results are in columns 13 to 15 of table A1 in appendix A4).  
13  
14  
15  
16  
17

### 18 *Forward selection*

19 The use of forward selection to identify relevant control variables reveals a similar but  
20 slightly different set of control variables to those from the backward selection process. If this  
21 different set of controls is included in an IV specification with all potential instruments then  
22 we obtain the result shown in column 1 of Table 3 (the corresponding first-stage results are in  
23 columns 1-3 of Table A2 in appendix A4). This has three covariates all of which are  
24 statistically significant with negative coefficients on the three expenditure variables. The  
25 problem with this specification is that the instrument set is not valid but if we drop the four  
26 most problematic instruments and re-estimate, we obtain the result in column 2 of Table 3  
27 (see columns 4-6 of Table A2 in appendix A4 for the first-stage results). Although the  
28 instruments are still invalid at the 5% level (Hansen-Sargan test statistic), there has been  
29 considerable improvement. However, the loss of these four instruments has not overcome the  
30 weakness issue associated with the instruments for healthcare and social service expenditure  
31 (the Sanderson-Windmeijer F-statistics are well below ten).  
32  
33  
34  
35  
36  
37  
38  
39  
40  
41  
42  
43

44 If we drop the two least significant instruments we get the result in column 3 of table 3. The  
45 instrument set now shows no evidence of invalidity but there is still some evidence of  
46 weakness. We have no further instruments to add but, if we check to see whether any of the  
47 currently omitted covariates belong in the specification, we find that the addition of the  
48 measure of 'older person need for social service care' has a significant positive coefficient  
49 (result not shown). The inclusion of this variable generates an insignificant coefficient on the  
50 'owner occupied' instrument for social service expenditure and, if we re-estimate without  
51 this, we obtain the result shown in column 4 of table 3. In this specification the expenditure  
52 variables are endogenous, the instrument set is valid, and the instruments for each  
53  
54  
55  
56  
57  
58  
59  
60

1  
2  
3 expenditure variable demonstrate no evidence of weakness. There is also no evidence of mis-  
4 specification.  
5  
6  
7

### 8 *Application of estimated elasticities to spending constraints*

9

10 In a recent paper annual data on healthcare and social care spending for England from 2001  
11 to 2014 was used to estimate the impact of the UK government's austerity programme on  
12 mortality.<sup>8</sup> Time trend analysis was used to compare actual mortality rates in 2011-2014 with  
13 the counterfactual rates expected based on trends before the imposition of austerity. These  
14 authors found that spending constraints between 2010 and 2014 were associated with 45,368  
15 more deaths than would have been expected based on pre-2010 trends.  
16  
17  
18  
19  
20  
21

22 We can use the outcome elasticities reported above to present some alternative but  
23 comparable estimates and these are summarised in table 4. The public health elasticities are  
24 not included in the excess deaths calculations because time series data for public health  
25 expenditure is not available before 2013/14 and this is probably why the time trend analysis  
26 did not consider the impact of public health expenditure.<sup>8</sup> We have included this variable in  
27 the mortality outcome equations estimated here because our study year (2013/14) is the first  
28 year for which public health expenditure data is reported and its omission may bias the  
29 estimated coefficients on the other two healthcare-related types of expenditure. Moreover, a  
30 recent paper suggests that public health expenditure has a significant effect on mortality.<sup>10</sup>  
31  
32  
33  
34  
35  
36  
37  
38  
39

40 The outcome elasticities associated with healthcare and social care expenditure are in column  
41 1 (backward selection) and column 2 (forward selection) of table 4. The time trend study  
42 reports that real social care spending per capita increased by 2.20% between 2001/02 and  
43 2009/10 but decreased by 1.57% between 2010/11 and 2014/15. If this annual difference  
44 (3.77%) is applied to each of the latter four years then the total spending gap is 15.08%  
45 (column 3). In 2012 there were 467,000 deaths in England. The more conservative of the  
46 two social care elasticity estimates suggests that a 1% increase in spend would save 1,569  
47 lives (=0.336% of 467,000). Hence the 'loss' of 15.08% of social care expenditure over the  
48 period 2010/11 to 2014/15 is associated with 23,662 excess deaths.  
49  
50  
51  
52  
53  
54  
55

56 A similar calculation can be undertaken for healthcare expenditure. The time trend study  
57 reports that real healthcare spending per capita increased by 3.82% between 2001/02 and  
58 2009/10 but by 0.41% between 2010/11 and 2014/15. If this annual difference (3.41%) is  
59  
60

1  
2  
3 applied to each of the latter four years then the total spending gap attributable to austerity is  
4 13.64%. Our healthcare elasticity suggests that a 1% increase in spend would save 2,484  
5 lives (=0.532% of 467,000). Hence the 'loss' of 13.64% of healthcare expenditure over the  
6 period 2010/11 to 2014/15 is associated with 33,888 excess deaths.  
7  
8  
9

10  
11 The more conservative of our two sets of results suggest that the constraints on the growth of  
12 healthcare and social care expenditure during this period of 'austerity' have been associated  
13 with 57,550 (=23,662+33,888) more deaths than would have been observed had expenditure  
14 growth followed pre-2010 trends. The less conservative of our two sets of results suggests  
15 more deaths (see column 5 of table 4), and both estimates can be compared with the results  
16 from the time trend study (see column 6 of table 4).<sup>8</sup>  
17  
18  
19  
20  
21  
22

## 23 24 **7. Discussion**

25  
26  
27 Although our study has adopted an entirely different approach to the time trend study, it  
28 reveals a broadly similar picture: that 'austerity' related reductions in the growth of  
29 healthcare and social care expenditure have been associated with a much larger number of  
30 deaths than would have been expected had pre-austerity expenditure trends continued.  
31  
32  
33

34  
35 Both the healthcare and social care expenditure variables have a significant negative effect on  
36 mortality in both the backward and forward selection specifications, and the public health  
37 effect is also statistically significant in the latter specification. If we focus on the more  
38 conservative estimates (from the backward selection specification) we note that the  
39 coefficient on social care expenditure is -0.336. This suggests that a 1% increase in  
40 expenditure is associated with a 0.336% reduction in mortality. The coefficient on healthcare  
41 expenditure is larger (absolutely) at -0.532 but it should be noted that a 1% boost in the  
42 healthcare budget would cost about four times as much as a 1% boost in social care  
43 expenditure.  
44  
45  
46  
47  
48  
49  
50  
51

52  
53 The coefficient on healthcare expenditure, -0.532 (backward selection) or -0.693 (forward  
54 selection) can be compared with that reported by a recent study that undertook a similar  
55 analysis of English data for 2013/14 but which excluded social care expenditure from the  
56 estimating equation. In that study the coefficient on healthcare expenditure was -0.672.<sup>10</sup> The  
57 difference between these estimates is relatively small. Several recent studies from Australia,  
58  
59  
60



1  
2  
3 England, Spain and Sweden have sought to establish how responsive mortality is to changes  
4 in health care expenditure.<sup>31 32 33 34</sup> These studies have typically omitted other types of health-  
5 related expenditure but our findings suggest that the addition of these other types of  
6 expenditure will have little impact on the responsiveness of mortality to healthcare  
7 expenditure.  
8  
9  
10  
11  
12

13 As social care expenditure is designed primarily to improve recipients' quality of life, it is  
14 slightly surprising that the coefficient on social care is as large as -0.336, particularly when  
15 the elasticity associated with healthcare expenditure is -0.532 (both figures are backward  
16 selection estimates). To understand this relatively large mortality response to social care  
17 expenditure we need to distinguish between the *direct* and *indirect* effects of healthcare and  
18 social care expenditure. Healthcare expenditure has a primarily *direct* effect on mortality;  
19 we would expect areas with better healthcare provision to have lower mortality rates because  
20 more expenditure will buy more medical staff and facilities, and these inputs are directly  
21 responsible for life saving healthcare.  
22  
23  
24  
25  
26  
27  
28  
29

30 Social care on the other hand may generate both *direct* and *indirect* effects on mortality, and  
31 the relative size of each effect is unclear. There will be a direct effect via the prevention of  
32 life-threatening conditions (for example, better social care provision might mean that  
33 vulnerable people are less likely to have life-threatening falls), but there will also be an  
34 indirect effect where better social care facilitates access by others to healthcare services. For  
35 example, if a patient cannot be discharged from hospital due to a lack of social care provision  
36 (eg due to a lack of care in the community or residential home beds), their hospital bed  
37 cannot be used by others who might benefit from it. In this way the indirect effect of social  
38 care facilitates lower mortality, not for those receiving the social care, but for those who are  
39 able to access healthcare sooner than they would otherwise have done.  
40  
41  
42  
43  
44  
45  
46  
47  
48  
49

### 50 *Study limitations*

51 This study is constrained by the availability of mortality data and health-related expenditure  
52 data, and the implementation of central government funding formulae with exogenous  
53 elements for all three types of expenditure. Our study year (2013/14) is the first year for  
54 which there were resource allocation formulae for both health care and public health  
55 expenditure, and a relative needs formula informed the allocation of central government  
56  
57  
58  
59  
60

1  
2  
3 funding to LAs for social care. As a result, estimation of a panel data specification is not  
4 permitted by the data and the estimated elasticities for 2013/14 may not hold in other years.  
5  
6  
7

8 The estimated mortality equation contains no dynamics and implicitly assumes that all health  
9 benefits occur contemporaneously with expenditure. However, as our health outcome  
10 measure reflects mortality in both the same year as expenditure and also in the two  
11 subsequent years, we do capture some of the lagged effect. Nevertheless, we readily  
12 acknowledge that some health benefits associated with current expenditure may occur many  
13 years later. At the same time, however, we also acknowledge that current mortality may  
14 reflect health-related expenditure from many years ago. Our implicit assumption is that these  
15 two effects broadly cancel out each other so that, by relating current expenditure to current  
16 outcomes, we obtain a reasonable estimate of the total effect of expenditure on mortality.  
17  
18  
19  
20  
21  
22  
23  
24  
25

26 We should also note that primary care and specialised commissioning are not included in the  
27 measure of healthcare expenditure used here. This is because responsibility for these types of  
28 expenditure returned to central administrators in April 2013 following the reforms associated  
29 with the Health and Social Care Act 2012. Therefore if, for example, the centralisation of  
30 specialist commissioning led to the unequal provision of such services across the country, this  
31 could have an unaccounted-for effect on the relationship between local spending and  
32 mortality. Related to this, there is also the possibility that we have omitted a relevant  
33 confounder (eg one that affects both mortality and expenditure) from our regression  
34 specifications and such an omission may affect the size of the mortality response to  
35 expenditure.  
36  
37  
38  
39  
40  
41  
42  
43  
44  
45

## 46 **8. Concluding remarks**

47  
48  
49 Our results – using an entirely different estimation approach – have confirmed the results  
50 reported previously: that the restrictions on the growth in health and social care expenditure  
51 during ‘austerity’ have been associated with tens of thousands more deaths than would have  
52 been observed had pre-austerity expenditure growth been sustained.<sup>8</sup>  
53  
54  
55  
56  
57

58 While previous studies have found that healthcare and public health expenditure have a  
59 significant negative effect on mortality, this study makes a major contribution by additionally  
60

1  
2  
3 estimating the effect of social care expenditure. There is evidence that all three types of  
4 health-related expenditure have a significant negative effect on mortality. There is also  
5 evidence that additional social care expenditure is more than twice as productive as additional  
6 healthcare expenditure, and that the addition of social care expenditure in the health outcome  
7 equation has little effect on the size of the mortality response to changes in healthcare  
8 expenditure.  
9  
10  
11  
12  
13  
14  
15  
16  
17  
18  
19  
20  
21  
22  
23  
24  
25  
26  
27  
28  
29  
30  
31  
32  
33  
34  
35  
36  
37  
38  
39  
40  
41  
42  
43  
44  
45  
46  
47  
48  
49  
50  
51  
52  
53  
54  
55  
56  
57  
58  
59  
60

For peer review only

### Contributorship statement

All (SM, FL, JL and KC) authors contributed to the concept and design of this paper. SM led on the analysis and drafting, and the final paper was edited and approved by all four authors. The corresponding author attests that all listed authors meet authorship criteria and that no others meeting these criteria have been omitted. SM is the paper's guarantor.

### Competing interest statement

All authors have completed the Unified Competing Interest form (available on request from the corresponding author) and declare: financial support from the National Institute for Health Research Policy Research Programme for the submitted work; no financial relationships with any organisations that might have an interest in the submitted work in the previous three years; and no other relationships or activities that could appear to have influenced the submitted work.

### Details of funding

This paper reports independent research funded by the National Institute for Health Research Policy Research Programme (NIHR PRP) through its Policy Research Unit in Economic Evaluation of Health & Care Interventions (EEPRU, grant reference PR-PRU-1217-20401).

### Data sharing statement

All of the raw data are in the public domain. The social care expenditure data is available from the publication 'Local authority revenue expenditure and financing England: 2013 to 2014 individual local authority data – outturn' at <https://www.gov.uk/government/statistics/local-authority-revenue-expenditure-and-financing-england-2013-to-2014-individual-local-authority-data-outturn> [accessed 05 September 2020]. The sparsity and input price adjustment variable from the older person's relative needs formula are available from the publication 'Calculation of 2013/14 Formula Funding' at <https://webarchive.nationalarchives.gov.uk/20140505105851/http://www.local.communities>.

1  
2  
3 [gov.uk/finance/1314/CalcFFs.pdf](https://www.gov.uk/finance/1314/CalcFFs.pdf) [accessed 05 September 2020]. The ‘type of local  
4 authority’ dummies are available from the data dictionary in the zip file at  
5  
6 [https://digital.nhs.uk/data-and-information/publications/statistical/adult-social-care-activity-](https://digital.nhs.uk/data-and-information/publications/statistical/adult-social-care-activity-and-finance-report/2017-18)  
7 [and-finance-report/2017-18](https://digital.nhs.uk/data-and-information/publications/statistical/adult-social-care-activity-and-finance-report/2017-18) [accessed 20 October 2020]. The healthcare expenditure data are  
8 available in the 2013-14 CCG Programme Budgeting Benchmarking Tool. This is available  
9 from <https://www.england.nhs.uk/prog-budgeting/> [accessed 05 September 2020]. The socio-  
10 economic variables are constructed using the 2011 Population Census. Census data is  
11 available from the Office for National Statistics at  
12 <https://www.ons.gov.uk/peoplepopulationandcommunity/populationandmigration/population>  
13 [estimates/datasets/2011censuskeystatisticsforlocalauthoritiesinenglandandwales](https://www.ons.gov.uk/peoplepopulationandcommunity/populationandmigration/population) [accessed 05  
14 September 2020]. The cells used to construct the socio-economic variables are listed in  
15 Table 92 of Claxton, K., Martin, S., Soares M, Rice N, Spackman E, Hinde S, Devlin N,  
16 Smith PC and Sculpher M. (2015). Methods for the estimation of the National Institute for  
17 Health and Care Excellence cost-effectiveness threshold. Health technology assessment,  
18 19(14), pp.1-503. Available from <https://www.ncbi.nlm.nih.gov/books/NBK274318/>  
19 [accessed 05 September 2020]. The public health expenditure data are available from ‘Local  
20 authority revenue expenditure and financing England: 2013 to 2014 individual local authority  
21 data – outturn’ which is available from [https://www.gov.uk/government/statistics/local-](https://www.gov.uk/government/statistics/local-authority-revenue-expenditure-and-financing-england-2013-to-2014-individual-local-authority-data-outturn)  
22 [authority-revenue-expenditure-and-financing-england-2013-to-2014-individual-local-](https://www.gov.uk/government/statistics/local-authority-revenue-expenditure-and-financing-england-2013-to-2014-individual-local-authority-data-outturn)  
23 [authority-data-outturn](https://www.gov.uk/government/statistics/local-authority-revenue-expenditure-and-financing-england-2013-to-2014-individual-local-authority-data-outturn) [accessed 05 September 2020]’. The instruments for public health  
24 expenditure are available in ‘Exposition Book Public Health Allocations 2013-14 and 2014-  
25 15: Technical Guide’ and this is available from  
26 [https://assets.publishing.service.gov.uk/government/uploads/system/uploads/attachment\\_data](https://assets.publishing.service.gov.uk/government/uploads/system/uploads/attachment_data/file/213324/Public-Health-Weighted-Capitation-FormulaTechnical-Guide-v0.13.pdf)  
27 [/file/213324/Public-Health-Weighted-Capitation-FormulaTechnical-Guide-v0.13.pdf](https://assets.publishing.service.gov.uk/government/uploads/system/uploads/attachment_data/file/213324/Public-Health-Weighted-Capitation-FormulaTechnical-Guide-v0.13.pdf)  
28 [accessed 05 September 2020]. The DFT variable for healthcare expenditure is available from  
29 the Department of Health’s website at [https://www.networks.nhs.uk/nhsnetworks/health-](https://www.networks.nhs.uk/nhsnetworks/health-investment-network/news/2012-13-programme-budgeting-data-is-now-available)  
30 [investment-network/news/2012-13-programme-budgeting-data-is-now-](https://www.networks.nhs.uk/nhsnetworks/health-investment-network/news/2012-13-programme-budgeting-data-is-now-available) available [accessed 05  
31 September 2020], and the MFF and prescribing cost age indices are available from the  
32 exposition books for the 2011/12 allocations at  
33 <https://www.gov.uk/government/publications/exposition-book-2011-2012> [accessed 05  
34 September 2020].  
35  
36  
37  
38  
39  
40  
41  
42  
43  
44  
45  
46  
47  
48  
49  
50  
51  
52  
53  
54  
55  
56  
57  
58  
59  
60

## References

1. Demakakos, P. (2019). Austerity, socioeconomic inequalities and stalling life expectancy in the UK: Two parallel stories or one? *Maturitas*, 123, pp89-90. Available from <https://doi.org/10.1016/j.maturitas.2018.12.007> [accessed 05 September 2020].
2. Hiam, L., Dorling, D. and McKee, M. (2018). The cuts and poor health: when and how can we say that one thing causes another? *Journal of the Royal Society of Medicine*, 111(6), 199–202. Available from <https://doi.org/10.1177/0141076818779237> [accessed 05 September 2020].
3. Marmot M. J (2018). *J Epidemiol Community Health*, May, Vol 72 No 5, pp359-360. Available from <https://jech.bmj.com/content/jech/72/5/359.full.pdf> [accessed 05 September 2020].
4. Hiam L, Harrison D, McKee M and D Dorling (2018). Why is life expectancy in England and Wales ‘stalling’? *J Epidemiol Community Health* 2018, 72, 404-408. Available from <https://jech.bmj.com/content/jech/72/5/404.full.pdf> [accessed 05 September 2020].
5. Faragher, R. (2017). Is austerity really to blame for stalling life expectancy in England? *The Conversation*, 20 July, 2017. Available from <http://theconversation.com/is-austerity-really-to-blame-for-stalling-life-expectancy-in-england-81206> [accessed 05 September 2020].
6. Loopstra, R., McKee, M., Katikireddi, S. V, Taylor-Robinson, D., Barr, B. and Stuckler, D. (2016). Austerity and old-age mortality in England: a longitudinal cross-local area analysis, 2007–2013. *Journal of the Royal Society of Medicine*, 109(3), 109-116. DOI: 10.1177/0141076816632215 [accessed 12 May 2021].
7. Dorling, D (2019). Austerity bites—falling life expectancy in the UK. *BMJ*, March 19. Available from <https://blogs.bmj.com/bmj/2019/03/19/danny-dorling/> [accessed 05 September 2020].
8. Watkins J, Wulaningsih W, Da Zhou C, *et al* (2017). Effects of health and social care spending constraints on mortality in England: a time trend analysis. *BMJ Open* 2017, v7, 11. DOI: 10.1136/bmjopen-2017-017722 [accessed 05 September 2020].
9. Claxton, K., Lomas, J. and Martin, S. (2018). The impact of NHS expenditure on health outcomes in England: Alternative approaches to identification in all-cause and disease specific models of mortality. *Health Economics*, 27(6), pp.1017-1023. Available at: <https://onlinelibrary.wiley.com/doi/abs/10.1002/hec.3650> [accessed 05 September 2020].
10. Martin, S., Lomas, J. and Claxton, K. (2020). Is an ounce of prevention worth a pound of cure? Estimates of the impact of English public health grant on mortality and morbidity. *BMJ Open*, volume 10, issue10. Available at: <https://bmjopen.bmj.com/content/10/10/e036411> [accessed 20 October 2020].

- 1  
2  
3 11. Forder, J., Vadean, F., Rand, S. & Malley, J. (2018). The impact of long-term care on  
4 quality of life. *Health economics*, 27, e43-e58. Available from  
5 <https://onlinelibrary.wiley.com/doi/10.1002/hec.3612> [accessed 05 September 2020].  
6  
7  
8 12. Fernandez, J.-L. and Forder, J. (2011). Consequences of local variations in social care on  
9 the performance of the acute health care sector. *Applied Economics*, 40, 1503-1518.  
10 Available from <https://www.tandfonline.com/doi/full/10.1080/00036840600843939>  
11 [accessed from 05 September 2020].  
12  
13  
14 13. Forder, J. (2009). Long-term care and hospital utilisation by older people: an analysis of  
15 substitution rates. *Health Economics*, 18, 1322-1338. Available from  
16 <https://onlinelibrary.wiley.com/doi/abs/10.1002/hec.1438> [accessed 05 September 2020].  
17  
18  
19 14. Gaughan, J., Gravelle, H. and Siciliani, L. (2015). Testing the bed-blocking hypothesis:  
20 does nursing and care home supply reduce delayed hospital discharges? *Health economics*,  
21 24, 32-44. Available from <https://onlinelibrary.wiley.com/doi/10.1002/hec.3150> [accessed  
22 05 September 2020].  
23  
24  
25 15. Forder, J., Gousia, K. & Saloniki, E.-C. (2018). The impact of long-term care on primary  
26 care doctor consultations for people over 75 years. *The European Journal of Health*  
27 *Economics*, 1-13. Available from  
28 [https://ideas.repec.org/a/spr/eujhec/v20y2019i3d10.1007\\_s10198-018-0999-6.html](https://ideas.repec.org/a/spr/eujhec/v20y2019i3d10.1007_s10198-018-0999-6.html) [accessed  
29 05 September 2020].  
30  
31  
32 16. Bradley, E. H., Canavan, M., Rogan, E., Talbert-Slagle, K., Ndumele, C., Taylor, L. and  
33 Curry, L. A. (2016). Variation in health outcomes: the role of spending on social services,  
34 public health and health care, 2000-09. *Health Affairs*, 35, 5. Available from  
35 <https://doi.org/10.1377/hlthaff.2015.0814> [accessed 30 April 2021].  
36  
37  
38 17. NAO (2018). Adult social care at a glance. National Audit Office, July. Available from  
39 <https://www.nao.org.uk/wp-content/uploads/2018/07/Adult-social-care-at-a-glance.pdf>  
40 [accessed 05 September 2020].  
41  
42  
43 18. Department of Health (2002). Fair access to care services guidance on eligibility criteria  
44 for adult social care. Available from  
45 [https://webarchive.nationalarchives.gov.uk/20121205180615/http://www.dh.gov.uk/prod\\_consum\\_dh/groups/dh\\_digitalassets/@dh/@en/documents/digitalasset/dh\\_4019641.pdf](https://webarchive.nationalarchives.gov.uk/20121205180615/http://www.dh.gov.uk/prod_consum_dh/groups/dh_digitalassets/@dh/@en/documents/digitalasset/dh_4019641.pdf) [accessed  
46 05 September 2020]  
47  
48  
49 19. NAO (2014). Planning for the Better Care Fund. National Audit Office, November.  
50 Available from <https://www.nao.org.uk/wp-content/uploads/2014/11/Planning-for-the-better-care-fund.pdf> [accessed 05 September 2020].  
51  
52  
53 20. NAO (2017). Health and social care integration. National Audit Office, February.  
54 Available from  
55  
56  
57  
58  
59  
60

1  
2  
3 <https://www.nao.org.uk/wp-content/uploads/2017/02/Health-and-social-care-integration.pdf>  
4 [accessed 05 September 2020].  
5

6  
7 21. DH (2012). Exposition Book Public Health Allocations 2013-14 and 2014-15: Technical  
8 Guide. Available from  
9 [https://assets.publishing.service.gov.uk/government/uploads/system/uploads/attachment\\_data](https://assets.publishing.service.gov.uk/government/uploads/system/uploads/attachment_data/file/213324/Public-Health-Weighted-Capitation-FormulaTechnical-Guide-v0.13.pdf)  
10 [/file/213324/Public-Health-Weighted-Capitation-FormulaTechnical-Guide-v0.13.pdf](https://assets.publishing.service.gov.uk/government/uploads/system/uploads/attachment_data/file/213324/Public-Health-Weighted-Capitation-FormulaTechnical-Guide-v0.13.pdf)  
11 [accessed 05 September 2020].  
12  
13

14 22. MCHLG (2015). Local authority revenue expenditure and financing England: 2013 to  
15 2014 individual local authority data – outturn. Available from  
16 [https://www.gov.uk/government/statistics/local-authority-revenue-expenditure-and-](https://www.gov.uk/government/statistics/local-authority-revenue-expenditure-and-financing-england-2013-to-2014-individual-local-authority-data-outturn)  
17 [financing-england-2013-to-2014-individual-local-authority-data-outturn](https://www.gov.uk/government/statistics/local-authority-revenue-expenditure-and-financing-england-2013-to-2014-individual-local-authority-data-outturn) [accessed 05  
18 September 2020].  
19  
20

21 23. NHS England (2012). Allocations for 2013/14. Available from  
22 <https://www.england.nhs.uk/allocations/allocations-2013-14/> [accessed 05 September 2020].  
23  
24

25 24. Andrews, M. et al., 2017. Inference in the presence of redundant moment conditions and  
26 the impact of government health expenditure on health outcomes in England. *Econometric*  
27 *Reviews*, 36(1–3), pp.23–41. Available from  
28 <https://www.tandfonline.com/doi/full/10.1080/07474938.2016.1114205> [accessed 05  
29 September, 2020].  
30  
31

32 25. DCLG (2013). Calculation of 2013/14 Formula Funding. January. See  
33 [https://webarchive.nationalarchives.gov.uk/20140505105851/http://www.local.communities.](https://webarchive.nationalarchives.gov.uk/20140505105851/http://www.local.communities.gov.uk/finance/1314/CalcFFs.pdf)  
34 [gov.uk/finance/1314/CalcFFs.pdf](https://webarchive.nationalarchives.gov.uk/20140505105851/http://www.local.communities.gov.uk/finance/1314/CalcFFs.pdf) [accessed 05 September 2020].  
35  
36

37 26. Forder, J, Malley, J, Towers A, and A Netten (2014). Using cost-effectiveness estimates  
38 from survey data to guide commissioning: an application to home care. *Health Economics*,  
39 23, 8, pp979-992. Available from <https://doi.org/10.1002/hec.2973> [accessed 05 September  
40 2020].  
41  
42

43 27. Sanderson, E. and F. Windmeijer, (2016). A Weak Instrument F-Test in Linear IV  
44 Models with Multiple Endogenous Variables. *Journal of Econometrics*, 190, 2, 212-221.  
45 Available from <https://doi.org/10.1016/j.jeconom.2015.06.004> [accessed 12 May 2021].  
46  
47

48 28. Baum, C.F., Schaffer, M.E., Stillman, S. (2010). ivreg2: Stata module for extended  
49 instrumental variables/2SLS, GMM and AC/HAC, LIML and k-class regression. Available  
50 from <http://ideas.repec.org/c/boc/bocode/s425401.html> [accessed 05 September 2020].  
51  
52

53 29. Pesaran, M.H. and L.W. Taylor, *Diagnostics for IV regressions*. Oxford Bulletin of  
54 Economics and Statistics, 1999. 61(2): p. 255-265.  
55  
56

57 30. NHS England (2015). 2013-14 CCG Programme Budgeting Benchmarking Tool.  
58 Available from <https://www.england.nhs.uk/prog-budgeting/> [accessed 05 September 2020].  
59  
60



- 1  
2  
3 31. Edney, L.C., Afzali, H.H.A., Cheng, T.C., Karnon, J.(2018). Estimating the reference  
4 incremental cost-effectiveness ratio for the Australian Health System.  
5 *Pharmacoeconomics* 36(2), 239–252. Available from  
6 <https://link.springer.com/article/10.1007/s40273-017-0585-2> [accessed 05 September 2020].  
7  
8  
9 32. Siverskog, J. & Henriksson, M (2019). Estimating the marginal cost of a life year in  
10 Sweden’s public healthcare sector. *Eur J Health Econ* (2019) 20: 751. Available from  
11 <https://doi.org/10.1007/s10198-019-01039-0> [accessed 05 September 2020].  
12  
13  
14 33. Vallejo-Torres, L., Garcia-Lorenzo, B., Serrano-Aguilar, P. (2018). Estimating a cost-  
15 effectiveness threshold for the Spanish NHS. *Health Economics*, 27(4), 746–761. Available  
16 from <https://onlinelibrary.wiley.com/doi/10.1002/hec.3633> [accessed 05 September 2020].  
17  
18  
19 34. Claxton, K., Martin, S., Soares M, Rice N, Spackman E, Hinde S, Devlin N, Smith PC  
20 and Sculpher M. (2015). Methods for the estimation of the National Institute for Health and  
21 Care Excellence cost-effectiveness threshold. *Health technology assessment*, 19(14), pp.1-  
22 503. Available from <https://www.ncbi.nlm.nih.gov/pubmed/25692211> [accessed 05  
23 September 2020].  
24  
25  
26  
27  
28  
29  
30  
31  
32  
33  
34  
35  
36  
37  
38  
39  
40  
41  
42  
43  
44  
45  
46  
47  
48  
49  
50  
51  
52  
53  
54  
55  
56  
57  
58  
59  
60

Table 1 Descriptive statistics for variables employed in study (created by the authors)

| Variable description                                                                 | Obs | Mean    | Std. Dev. | Min     | Max       |
|--------------------------------------------------------------------------------------|-----|---------|-----------|---------|-----------|
| <i>Mortality rate, population, and expenditure variables</i>                         |     |         |           |         |           |
| Years of life lost rate, standardised, per 100,000 population, 2013/2014/2015 pooled | 151 | 443.3   | 85.0      | 267.5   | 775.9     |
| Local authority population, 2013/14                                                  | 151 | 369,610 | 271,897   | 2,381   | 1,481,378 |
| Social service spend per person, 2013/14, £                                          | 151 | 306.60  | 46.58     | 209.08  | 660.42    |
| NHS healthcare spend per person, 2013/14, £                                          | 151 | 1152.13 | 75.81     | 1019.89 | 1479.11   |
| Public health expenditure per person, 2013/14, £                                     | 152 | 52.60   | 25.15     | 18.52   | 186.21    |
| <i>Controls</i>                                                                      |     |         |           |         |           |
| Index of Multiple Deprivation 2010                                                   | 152 | 23.0753 | 8.6040    | 5.4466  | 43.4465   |
| Young adult social service need per person                                           | 151 | 1.0000  | 0.2519    | 0.4341  | 1.7546    |
| Older adult social service need per person                                           | 151 | 1.0000  | 0.2329    | 0.5714  | 1.9716    |
| Proportion of all residents born outside the European Union                          | 152 | 0.1281  | 0.1147    | 0.0144  | 0.5060    |
| Proportion of population in white ethnic group                                       | 152 | 0.8364  | 0.1626    | 0.2897  | 0.9882    |
| Proportion of population providing unpaid care                                       | 152 | 0.1008  | 0.0138    | 0.0651  | 0.1289    |
| Proportion of population aged 16-74 with no qualifications                           | 152 | 0.2469  | 0.0606    | 0.0720  | 0.3874    |
| Proportion of households without a car                                               | 152 | 0.2862  | 0.1248    | 0.0899  | 0.6940    |
| Proportion of households that are one pensioner households, 2011                     | 152 | 0.1206  | 0.0208    | 0.0596  | 0.1667    |
| Proportion of households that are lone parent households with dependent children     | 152 | 0.0745  | 0.0185    | 0.0208  | 0.1436    |
| Proportion of population aged 16-74 that are permanently sick                        | 152 | 0.0424  | 0.0149    | 0.0086  | 0.0879    |
| Proportion of those aged 16-74 that are long-term unemployed                         | 152 | 0.0183  | 0.0058    | 0.0043  | 0.0367    |
| Proportion of those aged 16-74 in employment that are working agriculture            | 152 | 0.0064  | 0.0099    | 0.0003  | 0.0572    |
| Proportion of those aged 16-74 in managerial and professional occupations            | 152 | 0.3114  | 0.0769    | 0.1835  | 0.6674    |
| <i>Instruments: for social service (GSS) expenditure</i>                             |     |         |           |         |           |
| Type of LA: county council                                                           | 152 | 0.1776  | 0.3835    | 0.0000  | 1.0000    |
| Type of LA: London borough                                                           | 152 | 0.2171  | 0.4136    | 0.0000  | 1.0000    |
| Type of LA: Metropolitan district                                                    | 152 | 0.2368  | 0.4266    | 0.0000  | 1.0000    |
| Type of LA: Unitary authority                                                        | 152 | 0.3684  | 0.4840    | 0.0000  | 1.0000    |
| Input price index for older people's social services                                 | 152 | 1.0426  | 0.0634    | 1.0000  | 1.3607    |
| Population sparsity measure                                                          | 151 | 1.0057  | 0.0079    | 1.0000  | 1.0345    |
| Proportion of households that are owner occupied                                     | 152 | 0.6190  | 0.1152    | 0.2611  | 0.8086    |
| <i>Instruments: for public health (PH) expenditure</i>                               |     |         |           |         |           |
| Distance from target index, public health expenditure, 2013/14                       | 152 | 1.0667  | 0.5362    | 0.5392  | 6.6247    |
| Input price index (MFF), public health expenditure, 2013/14                          | 152 | 1.0122  | 0.0790    | 0.9151  | 1.2076    |
| <i>Instruments: for NHS healthcare (PB) expenditure</i>                              |     |         |           |         |           |
| Distance from target index, NHS healthcare expenditure                               | 152 | 1.0055  | 0.0515    | 0.9282  | 1.2250    |
| Input price index (MFF), resource allocation HCHS formula                            | 152 | 1.0063  | 0.0643    | 0.9319  | 1.1416    |
| Age index, resource allocation prescribing formula                                   | 152 | 0.9776  | 0.1283    | 0.6422  | 1.3007    |

Table 2 Obtaining a preferred health outcome specification for social care, healthcare and public health expenditure, backward selection (second-stage results) (created by the authors)

|                                                | (1)                | (2)                        | (3)                        | (4)               | (5)               | (6)               | (7)               |
|------------------------------------------------|--------------------|----------------------------|----------------------------|-------------------|-------------------|-------------------|-------------------|
|                                                | All causes         | All causes                 | All causes                 | All causes        | All causes        | All causes        | All causes        |
|                                                | 2013/14            | 2013/14                    | 2013/14 PB/PSS/PH          | 2013/14 PB/PSS/PH | 2013/14 PB/PSS/PH | 2013/14 PB/PSS/PH | 2013/14 PB/PSS/PH |
|                                                | PB/GSS/PH spend    | PB/GSS/PH spend            | SYLLR 2013/14/15           | SYLLR 2013/14/15  | SYLLR 2013/14/15  | SYLLR 2013/14/15  | SYLLR 2013/14/15  |
|                                                | outcome model      | outcome model              | outcome model              | outcome model     | outcome model     | outcome model     | outcome model     |
|                                                |                    |                            | instrument                 | instrument        | instrument        | instrument        | instrument        |
|                                                |                    |                            | PB/GSS/PH spend            | PB/GSS/PH spend   | PB/GSS/PH spend   | PB/GSS/PH spend   | PB/GSS/PH spend   |
|                                                | weighted           | weighted                   | weighted                   | weighted          | weighted          | weighted          | weighted          |
|                                                | OLS                | OLS                        | IV second stage            | IV second stage   | IV second stage   | IV second stage   | IV second stage   |
|                                                | full specification | parsimonious specification | parsimonious specification | parsimonious_v2   | parsimonious_v3   | parsimonious_v4   | parsimonious_v5   |
| VARIABLES                                      |                    |                            |                            |                   |                   |                   |                   |
| Public health expenditure per person           | 0.037              | 0.029                      | 0.017                      | 0.010             | 0.017             | -0.018            | -0.019            |
|                                                | [0.027]            | [0.027]                    | [0.032]                    | [0.039]           | [0.042]           | [0.041]           | [0.041]           |
| CCG (PB) healthcare spend per person           | -0.406***          | -0.492***                  | -0.840***                  | -0.609**          | -0.514            | -0.545**          | -0.532**          |
|                                                | [0.139]            | [0.119]                    | [0.142]                    | [0.251]           | [0.337]           | [0.243]           | [0.259]           |
| Social service (GSS) spend per person          | 0.044              | 0.039                      | -0.078                     | -0.272**          | -0.326*           | -0.344**          | -0.336**          |
|                                                | [0.055]            | [0.053]                    | [0.102]                    | [0.124]           | [0.182]           | [0.134]           | [0.152]           |
| Index of Multiple Deprivation 2010             | 0.219***           | 0.156**                    | 0.239***                   | 0.243***          | 0.238***          | -0.504*           | -0.505**          |
|                                                | [0.074]            | [0.066]                    | [0.059]                    | [0.068]           | [0.075]           | [0.260]           | [0.255]           |
| Young adult social service need per person     | 0.096              |                            |                            |                   |                   |                   |                   |
|                                                | [0.166]            |                            |                            |                   |                   |                   |                   |
| Older adult social service need per person     | 0.080              |                            |                            |                   |                   |                   |                   |
|                                                | [0.073]            |                            |                            |                   |                   |                   |                   |
| % residents born outside the European Union    | -0.038*            |                            |                            |                   |                   |                   |                   |
|                                                | [0.020]            |                            |                            |                   |                   |                   |                   |
| % population in white ethnic group             | 0.172***           | 0.227***                   | 0.289***                   | 0.309***          | 0.309***          | 0.321***          | 0.319***          |
|                                                | [0.054]            | [0.036]                    | [0.036]                    | [0.038]           | [0.041]           | [0.041]           | [0.046]           |
| % population providing unpaid care             | -0.455***          | -0.233***                  | -0.214**                   | -0.251**          | -0.230**          | -0.188**          | -0.190**          |
|                                                | [0.171]            | [0.086]                    | [0.087]                    | [0.098]           | [0.108]           | [0.085]           | [0.085]           |
| % population aged 16-74 with no qualifications | -0.043             |                            |                            |                   |                   |                   |                   |
|                                                | [0.101]            |                            |                            |                   |                   |                   |                   |
| % households without a car                     | -0.201***          |                            |                            |                   |                   |                   |                   |
|                                                | [0.074]            |                            |                            |                   |                   |                   |                   |
| % households that are one pensioner households | 0.057              |                            |                            |                   |                   |                   |                   |
|                                                | [0.073]            |                            |                            |                   |                   |                   |                   |

|    |                                                     |           |           |           |           |          |           |           |
|----|-----------------------------------------------------|-----------|-----------|-----------|-----------|----------|-----------|-----------|
| 1  | % lone parent households with dependent children    | 0.025     |           |           |           |          |           |           |
| 2  |                                                     | [0.065]   |           |           |           |          |           |           |
| 3  | % population aged 16-74 that are permanently sick   | 0.162*    | 0.217***  | 0.229***  | 0.262***  | 0.259*** | 0.271***  | 0.271***  |
| 4  |                                                     | [0.097]   | [0.069]   | [0.071]   | [0.087]   | [0.098]  | [0.080]   | [0.079]   |
| 5  | % aged 16-74 that are long-term unemployed          | 0.057     |           |           |           |          |           |           |
| 6  |                                                     | [0.057]   |           |           |           |          |           |           |
| 7  | % aged 16-74 in employment working agriculture      | -0.013    |           |           |           |          |           |           |
| 8  |                                                     | [0.012]   |           |           |           |          |           |           |
| 9  | % aged 16-74 in managerial/professional occupations | -0.241*** | -0.285*** | -0.190*** | -0.162*** | -0.154** | -0.098    | -0.100    |
| 10 |                                                     | [0.063]   | [0.044]   | [0.050]   | [0.051]   | [0.060]  | [0.062]   | [0.065]   |
| 11 | Index of Multiple Deprivation 2010 Squared          |           |           |           |           |          | 0.130***  | 0.130***  |
| 12 |                                                     |           |           |           |           |          | [0.043]   | [0.042]   |
| 13 | Constant                                            | 7.319***  | 8.862***  | 11.187*** | 9.408***  | 8.710*** | 10.277*** | 10.199*** |
| 14 |                                                     | [1.040]   | [0.819]   | [1.021]   | [1.693]   | [2.295]  | [1.568]   | [1.662]   |
| 15 | Observations                                        | 150       | 150       | 150       | 150       | 150      | 150       | 150       |
| 16 | R-squared                                           | 0.919     | 0.908     |           |           |          |           |           |
| 17 | Ramsey reset F statistic                            | 5.096     | 6.448     |           |           |          |           |           |
| 18 | Probability > F                                     | 0.002     | 0.000     |           |           |          |           |           |
| 19 | Endogeneity test statistic                          |           |           | 8.934     | 15.536    | 15.510   | 23.482    | 18.528    |
| 20 | Endogeneity p-value                                 |           |           | 0.030     | 0.001     | 0.001    | 0.000     | 0.000     |
| 21 | Hansen-Sargan test statistic                        |           |           | 21.671    | 10.327    | 2.506    | 0.265     | 0.257     |
| 22 | Hansen-Sargan p-value                               |           |           | 0.006     | 0.066     | 0.286    | 0.876     | 0.612     |
| 23 | Pesaran-Taylor reset statistic                      |           |           | 0.187     | 2.892     | 3.540    | 0.008     | 0.285     |
| 24 | Pesaran-Taylor p-value                              |           |           | 0.665     | 0.089     | 0.060    | 0.927     | 0.593     |
| 25 | Sanderson-Windmeijer_PB F-statistic                 |           |           | 8.390     | 8.966     | 13.333   | 14.352    | 15.818    |
| 26 | Sanderson-Windmeijer_PB p-value                     |           |           | 0.000     | 0.000     | 0.000    | 0.000     | 0.000     |
| 27 | Sanderson-Windmeijer_GSS F-statistic                |           |           | 4.437     | 4.875     | 6.720    | 9.063     | 11.567    |
| 28 | Sanderson-Windmeijer_GSS p-value                    |           |           | 0.000     | 0.000     | 0.000    | 0.000     | 0.000     |
| 29 | Sanderson-Windmeijer_PH F-statistic                 |           |           | 28.259    | 37.927    | 56.035   | 56.146    | 59.408    |
| 30 | Sanderson-Windmeijer_PH p-value                     |           |           | 0.000     | 0.000     | 0.000    | 0.000     | 0.000     |

Robust standard errors in brackets  
 \*\*\* p<0.01, \*\* p<0.05, \* p<0.1

Table 3 Obtaining a joint preferred specification for social care, healthcare and public health expenditure by combining full specifications with forward selection (second-stage results) (created by the authors)

|                                                   | (1)                        | (2)                     | (3)                     | (4)                     |
|---------------------------------------------------|----------------------------|-------------------------|-------------------------|-------------------------|
|                                                   | All causes                 | All causes              | All causes              | All causes              |
|                                                   | 2013/14 PB/PSS/PH spend    | 2013/14 PB/PSS/PH spend | 2013/14 PB/PSS/PH spend | 2013/14 PB/PSS/PH spend |
|                                                   | SYLLR 2013/14/15           | SYLLR 2013/14/15        | SYLLR 2013/14/15        | SYLLR 2013/14/15        |
|                                                   | outcome model              | outcome model           | outcome model           | outcome model           |
|                                                   | instrument PB/GSS/PH       | instrument PB/GSS/PH    | instrument PB/GSS/PH    | instrument PB/GSS/PH    |
|                                                   | spend                      | spend                   | spend                   | spend                   |
|                                                   | weighted                   | weighted                | weighted                | weighted                |
|                                                   | IV second stage            | IV second stage         | IV second stage         | IV second stage         |
|                                                   | parsimonious specification | specification_2         | specification_3         | specification_4         |
| VARIABLES                                         | 11 instruments             | 7 instruments           | 5 instruments           | 4 instruments           |
| Public health expenditure per person              | -0.051<br>[0.039]          | -0.043<br>[0.047]       | -0.060<br>[0.044]       | -0.099**<br>[0.045]     |
| CCG (PB) healthcare spend per person              | -0.862***<br>[0.223]       | -0.461<br>[0.313]       | -0.637*<br>[0.369]      | -0.693**<br>[0.333]     |
| Social service (GSS) spend per person             | -0.206<br>[0.133]          | -0.469***<br>[0.161]    | -0.370*<br>[0.205]      | -0.471**<br>[0.237]     |
| % population aged 16-74 that are permanently sick | 0.649***<br>[0.046]        | 0.651***<br>[0.054]     | 0.672***<br>[0.052]     | 0.528***<br>[0.073]     |
| % population providing unpaid care                | -0.381***<br>[0.086]       | -0.388***<br>[0.096]    | -0.400***<br>[0.097]    | -0.143<br>[0.118]       |
| % population in white ethnic group                | 0.163***<br>[0.042]        | 0.195***<br>[0.043]     | 0.180***<br>[0.046]     | 0.299***<br>[0.078]     |
| Older adult: social service need per person       |                            |                         |                         | 0.416***<br>[0.143]     |
| Constant                                          | 13.352***<br>[1.733]       | 10.204***<br>[2.389]    | 11.655***<br>[2.873]    | 12.245***<br>[2.546]    |
| Observations                                      | 150                        | 150                     | 150                     | 150                     |
| Endogeneity test statistic                        | 10.644                     | 17.686                  | 21.100                  | 23.214                  |
| Endogeneity p-value                               | 0.014                      | 0.001                   | 0.000                   | 0.000                   |
| Hansen-Sargan test statistic                      | 25.690                     | 10.432                  | 2.173                   | 0.080                   |
| Hansen-Sargan p-value                             | 0.001                      | 0.034                   | 0.337                   | 0.778                   |
| Pesaran-Taylor reset statistic                    | 0.052                      | 0.372                   | 0.080                   | 0.001                   |
| Pesaran-Taylor p-value                            | 0.820                      | 0.542                   | 0.777                   | 0.972                   |
| SW_PB F-statistic                                 | 5.977                      | 6.833                   | 7.878                   | 13.534                  |
| SW_PB p-value                                     | 0.000                      | 0.000                   | 0.000                   | 0.000                   |
| SW_GSS F-statistic                                | 4.939                      | 5.521                   | 6.135                   | 9.722                   |
| SW_GSS p-value                                    | 0.000                      | 0.000                   | 0.001                   | 0.000                   |
| SW_PH F-statistic                                 | 18.451                     | 22.092                  | 30.944                  | 46.946                  |

| SW | PH | p-value | 0.000 | 0.000 | 0.000 | 0.000 |
|----|----|---------|-------|-------|-------|-------|
|----|----|---------|-------|-------|-------|-------|

Robust standard errors in brackets  
 \*\*\* p<0.01, \*\* p<0.05, \* p<0.1

- 1
- 2
- 3
- 4
- 5
- 6
- 7
- 8
- 9
- 10
- 11
- 12
- 13
- 14
- 15
- 16
- 17
- 18
- 19
- 20
- 21
- 22
- 23
- 24
- 25
- 26
- 27
- 28
- 29
- 30
- 31
- 32
- 33
- 34
- 35
- 36
- 37
- 38
- 39
- 40
- 41
- 42
- 43
- 44
- 45
- 46

For peer review only

**Table 4 Results summary** (created by the authors)

| Type of health-related expenditure                            | Health outcome elasticity      |                                | Spending gap<br>per capita between<br>2001/02- 2009/10 and<br>2010/11-2014/15 | Deaths attributable to spending gap<br>(=annual deaths*elasticity*gap) |                            | Deaths attributable<br>to spending gap<br>from time<br>trend analysis <sup>7</sup> |
|---------------------------------------------------------------|--------------------------------|--------------------------------|-------------------------------------------------------------------------------|------------------------------------------------------------------------|----------------------------|------------------------------------------------------------------------------------|
|                                                               | Backward<br>Selection          | Forward<br>Selection           |                                                                               | Backward<br>Selection                                                  | Forward<br>Selection       |                                                                                    |
|                                                               | column 1                       | column 2                       | column 3                                                                      | column 4                                                               | column 5                   | column 6                                                                           |
| Social care expenditure<br>[95% confidence interval]          | -0.336<br>[-0.031, -<br>0.640] | -0.471<br>[0.003, -<br>0.945]  | 15.08%                                                                        | 23,662<br>[2,183, 45,071]                                              | 33,170<br>[-211, 66,550]   | n/a                                                                                |
| Healthcare expenditure<br>[95% confidence interval]           | -0.532<br>[-0.014, -<br>1.050] | -0.693<br>[-0.027, -<br>1.359] | 13.64%                                                                        | 33,888<br>[892, 66,884]                                                | 44,143<br>[1,720, 86,567]  | n/a                                                                                |
| Total social care and healthcare<br>[95% confidence interval] | n/a                            | n/a                            | n/a                                                                           | 57,550<br>[3,075, 111,955]                                             | 77,313<br>[1,509, 153,117] | 45,368<br>[34,530, 56,206]                                                         |

Figure 1 Illustration of the reverse causation issue and its resolution (created by the authors)

1  
2  
3  
4  
5  
6  
7  
8  
9  
10  
11  
12  
13  
14  
15  
16  
17  
18  
19  
20  
21  
22  
23  
24  
25  
26  
27  
28  
29  
30  
31  
32  
33  
34  
35  
36  
37  
38  
39  
40  
41  
42  
43  
44  
45  
46

For peer review only



Figure 1 Illustration of the reverse causation issue and its resolution

Part (a)

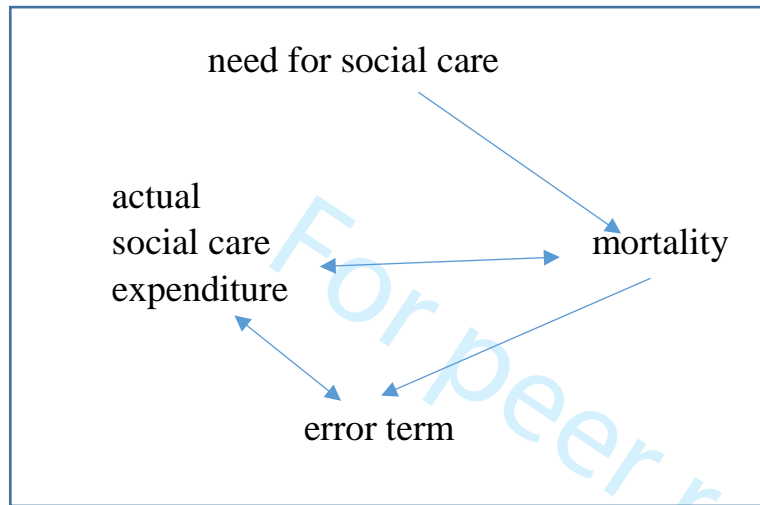

Part (b)

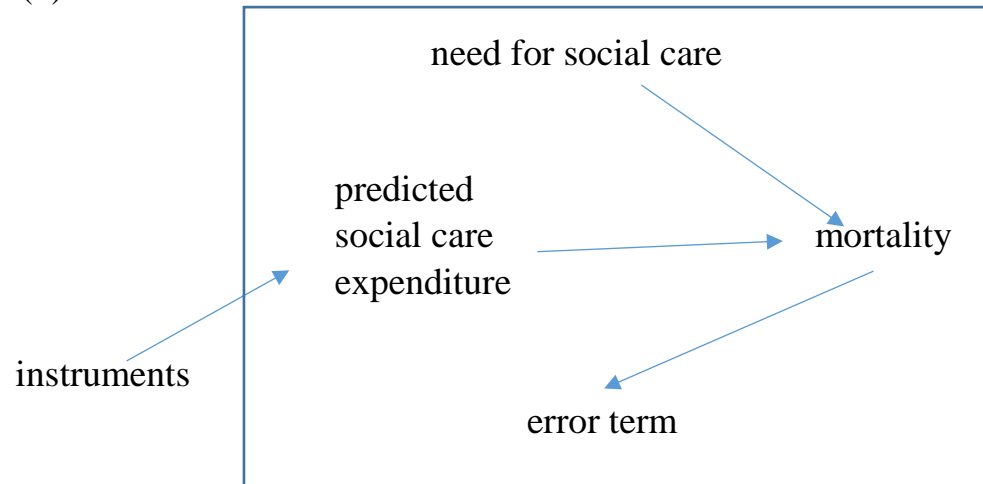

# The causal impact of social care, public health and healthcare expenditure on mortality in England: cross-sectional evidence for 2013/14

## Appendices

### Appendix A1: Further details about the instruments for healthcare expenditure

For 2013/14 the Department of Health allocated each Clinical Commissioning Group (CCG) a fixed proportion of the national budget (£65bn). CCGs used this allocation to fund expenditure on most types of healthcare except primary care, specialised commissioning and public health. CCGs reported their actual expenditure across various programmes of care and this data can be found in the programme budgeting dataset. This is available from <https://www.england.nhs.uk/prog-budgeting/> [accessed 05 September 2020].

Healthcare expenditure is instrumented in a similar way to social care expenditure and in line with equation (2) in the main text. The selection of the relevant funding rule variables for healthcare expenditure for 2013/14 is more difficult than usual due to the changes enacted by the Health and Social Care Act 2012. Normally, resource allocation formulae are updated annually but the approaching replacement of Primary Care Trusts (one set of local health authorities) with CCGs (a different set with different responsibilities) led to the freezing of the weighted capitation formula for 2012/13, with all Primary Care Trusts (PCTs) receiving the same (3%) growth rate over their 2011/12 allocations. Because CCGs were not responsible for the same set of services as PCTs (CCGs lost responsibility for primary care public health, specialised services, and primary care), there was a baseline exercise in 2012 that identified actual PCT expenditure on CCG service responsibilities and, for 2013/14, each CCG enjoyed an uplift of 2.3% on these 2012/13 baselines.

As a result of these changes, the most appropriate funding rule variables for CCG healthcare expenditure in 2013/14 are drawn from the 2011/12 allocations for PCTs, appropriately converted to the new (CCG) geography. These allocations reflect components of the funding formulae (one for the total allocation, one for Hospital and Community Health Services (HCHS), and one for prescribing), and we select three funding rule variables employed in these formulae which we believe are uncorrelated with mortality. More precisely, the funding rule variables for CCG

1  
2 healthcare expenditure for 2013/14 are: (i) the age index from the prescribing component of the  
3 total allocation; (ii) the MFF for the HCHS component of the total allocation; and (iii) the DFT for  
4 the total allocation to PCTs for 2011/12.  
5  
6  
7  
8  
9

## 10 **Appendix A2: Further details about the instruments for local public health expenditure**

11  
12  
13  
14 The resource allocation formula used to distribute the total public health budget to local authorities  
15 has three components. These are for substance misuse services, for non-mandatory services, and  
16 for mandatory services. Each of these three service areas has its own resource allocation formula  
17 but each formula has a similar structure to that outlined in equation (2) in the main text and two of  
18 the four variables in equation (2) (the MFF and the DFT) are present for all three components.  
19 Hence we use these variables as instruments for public health expenditure.  
20  
21  
22  
23  
24  
25  
26  
27

## 28 **Appendix A3 Are the selected instruments valid?**

29  
30 We noted in section 3 that valid instruments should be both uncorrelated with unobserved  
31 determinants of expenditure and mortality (i.e., instruments should be exogenous) and excludable  
32 from the second-stage regression equation (i.e., have no direct impact on mortality other than  
33 through their impact on expenditure). Let us consider whether the proposed instruments for our  
34 three expenditure variables are likely to meet these requirements.  
35  
36  
37  
38  
39  
40

### 41 *The MFF instrument for healthcare, public health and social care expenditure*

42  
43 The MFF (input price index) adjustment reflects prices in the local health economy and is used as  
44 an instrument for all three types of expenditure. It is designed to compensate health authorities for  
45 the unavoidable higher costs they incur when hiring staff and buying other goods and services. If  
46 the MFF adjustment is perfect then each authority would be able to buy the same bundle of inputs.  
47 The instrument could have no impact on mortality because it has no impact on real expenditure. In  
48 practice, however, the MFF adjustment will be imperfect and these imperfections will generate  
49 differences in the volume of real resources available to health authorities (we assume that this error  
50 is small relative to the adjustment for local prices). We have no reason to believe that errors in the  
51 MFF adjustment will have any effect on mortality other than through their effect on expenditure  
52 (this is required for the excludability assumption). However, the MFF index reflects characteristics  
53 of the local (health) economy that could potentially be correlated with unmeasured determinants of  
54  
55  
56  
57  
58  
59  
60

1  
2 mortality and this instrument's exogeneity is therefore conditional on the socio-economic variables  
3 included in the estimated specification.  
4  
5

#### 6 7 *The age-cost index instrument for healthcare*

8  
9 A similar argument can be made for the age-cost index that is used as an instrument for healthcare  
10 expenditure. This is designed to compensate health authorities for the unavoidable additional  
11 expenditure they incur due to the demographic profile of their population. If the age-cost  
12 adjustment is perfect for every health authority then all authorities would be able to offer the same  
13 level of healthcare irrespective of whether their population is a particularly old or young one.  
14 Again, this (age-cost) index will be a useful predictor of nominal expenditure but, if the adjustment  
15 is perfect, this instrument can have no impact on mortality because it has no impact on real  
16 expenditure. Although an imperfect age-cost adjustment will generate differences in the volume of  
17 real resources available to health authorities, there is no reason to believe that these errors will have  
18 any effect on mortality other than through their effect on expenditure. The age-cost index reflects  
19 the impact of the local population's demographic profile on healthcare costs. As is the case for the  
20 MFF, this profile could potentially be correlated with unmeasured determinants of mortality and  
21 this instrument's exogeneity is therefore conditional on the control variables employed in the  
22 estimated specification.  
23  
24  
25  
26  
27  
28  
29  
30  
31  
32  
33

#### 34 35 *The distance from target index instrument for public health and healthcare expenditure*

36  
37 The share of the national budget for both public health and healthcare expenditure apportioned to  
38 each health authority is governed by the Department of Health's allocation formula or 'funding  
39 rule'. This reflects each authority's need for expenditure and this, in turn, reflects the authority's  
40 population size, its age profile, local input prices, and other 'need for health care' factors.  
41 Periodically, the Department of Health revises its funding rule and this, together with data updates,  
42 generates a new target allocation for each authority. The new funding rule might generate a large  
43 change in the target allocation for some authorities and, to avoid sudden large reductions in actual  
44 budgets, such changes are usually incorporated into annual budgets over a number of years. The  
45 DFT index measures how far an authority's actual budget is below or above its target allocation.  
46  
47  
48  
49  
50  
51  
52

53  
54 A DFT index is used as an instrument for public health and healthcare expenditure. The DFT for  
55 healthcare will reflect the various funding formulae and 'pace of change' policies implemented  
56 under several governments of various political persuasions over the past thirty years. While there  
57 are undeniably policy choices involved, such as the setting of the 'pace of change' (POC)  
58 adjustment that transitions PCTs towards their target, over the recent past the POC policy focussed  
59  
60

1  
2 on providing a minimum basic budget uplift for all authorities with a larger increase for those that  
3 were most under-target. We have no evidence to suggest that these policy choices were made on  
4 the basis of other factors such as outcomes (excludability). Moreover, health authority allocations  
5 usually include a relatively small component that seeks to address health inequalities directly and it  
6 is at this point that outcomes are considered rather than at the POC policy stage. We also have no  
7 evidence to suggest that, conditional on our controls, the DFT index will be correlated with  
8 unmeasured/unobserved determinants of mortality (exogeneity).  
9  
10  
11  
12  
13  
14

15  
16 As noted above, a DFT index reflects how far an authority's actual budget is from its target  
17 allocation. This difference will reflect the product of three factors for the public health DFT index:  
18 (i) the size of PCT expenditure in 2010/11 on those public health activities that were transferred to  
19 local authorities in 2013/14; (ii) the public health grant funding formula for 2013/14; and (iii) the  
20 'pace of change' policy for the 2013/14 public health allocations (i.e., the extent to which actual  
21 allocations for 2013/14 moved budgets away from what had been spent on public health by PCTs  
22 and towards the target allocations generated by the new funding rule for 2013/14). We have no  
23 evidence to suggest that the resulting public health DFT was selected on the basis of factors such as  
24 mortality (excludability assumption). We also have no evidence to suggest that, conditional on our  
25 controls, the public health DFT index will be correlated with unmeasured/unobserved determinants  
26 of mortality (exogeneity).  
27  
28  
29  
30  
31  
32  
33  
34  
35

### 36 *The population sparsity index as an instrument for social care expenditure*

37  
38 The population sparsity index is designed to compensate health authorities for the unavoidable  
39 higher costs they incur by having to serve a sparsely populated area. If this sparsity adjustment is  
40 perfect then each authority would be perfectly compensated for any additional costs and be able to  
41 provide the same service level. The instrument could have no impact on mortality because it has no  
42 impact on real expenditure. In practice, of course, the sparsity adjustment will be imperfect and  
43 these imperfections will generate differences in the volume of real resources available to health  
44 authorities. As was the case for the MFF index, we have no reason to believe that errors in the  
45 sparsity adjustment will have any effect on mortality other than through their effect on expenditure.  
46 However, the sparsity index may be correlated with characteristics of the local (health) economy  
47 that could potentially be correlated with unmeasured determinants of mortality. This instrument's  
48 exogeneity is therefore conditional on the socio-economic variables included in the estimated  
49 specification.  
50  
51  
52  
53  
54  
55  
56  
57  
58  
59  
60

1  
2 *The type of local authority as an instrument for social care expenditure*

3  
4 A study of the impact of LA expenditure on home care services claimed that social care expenditure  
5 will reflect the service eligibility policy employed by different LAs and that ‘the innate culture and  
6 perspective of the council... will drive the generosity of policies more than small differences in the  
7 health of the population’. The researchers proposed the use of a set of four dummy variables  
8 reflecting the type of LA (Shire, Unitary, Metropolitan, London) as instruments on the assumption  
9 that ‘similar’ LAs will have ‘similar’ eligibility policies and expenditure levels. Conditional on the  
10 controls for social care need, we have no reason to believe that there will be a direct effect of the  
11 type of LA on mortality. The type of LA could be correlated with unmeasured determinants of  
12 mortality and so this instrument’s exogeneity is also conditional on the socio-economic variables  
13 included in the estimated specification.  
14  
15  
16  
17  
18  
19  
20  
21

22  
23 *The proportion of households that are owner occupied as an instrument for social care expenditure*

24 Conditional on the controls for social care need included in the estimated specification, we have no  
25 reason to believe that there will be a direct effect of the proportion of households that are owner  
26 occupied on mortality. The proportion of households that are owner occupied could be correlated  
27 with unmeasured determinants of mortality and so this instrument’s exogeneity is also conditional  
28 on the socio-economic variables included in the estimated specification.  
29  
30  
31  
32  
33  
34

35 In addition to the theoretical considerations outlined above, the validity of all instruments is tested  
36 empirically using the Hansen-Sargan test. The set of instruments associated with our preferred  
37 specifications pass this empirical test.  
38  
39  
40  
41  
42  
43

44 **Appendix A4**

45  
46  
47 This appendix contains the first-stage regressions associated with the second-stage results reported  
48 in the main body of the text.  
49  
50  
51  
52  
53  
54  
55  
56  
57  
58  
59  
60

Table A1 Obtaining a preferred health outcome specification for social care, healthcare and public health expenditure, backward selection, first-stage results

|                                                  | (1)                        | (2)                        | (3)                        | (4)                 | (5)                  | (6)                  | (7)                  | (8)                  | (9)                  |
|--------------------------------------------------|----------------------------|----------------------------|----------------------------|---------------------|----------------------|----------------------|----------------------|----------------------|----------------------|
|                                                  | All causes                 | All causes                 | All causes                 | All causes          | All causes           | All causes           | All causes           | All causes           | All causes           |
|                                                  | 2013/14 PB spend           | 2013/14 G_SS spend         | 2013/14 PH spend           | 2013/14 PB spend    | 2013/14 G_SS spend   | 2013/14 PH spend     | 2013/14 PB spend     | 2013/14 G_SS spend   | 2013/14 PH spend     |
|                                                  | SYLLR 2013/14/15           | SYLLR 2013/14/15           | SYLLR 2013/14/15           | SYLLR 2013/14/15    | SYLLR 2013/14/15     | SYLLR 2013/14/15     | SYLLR 2013/14/15     | SYLLR 2013/14/15     | SYLLR 2013/14/15     |
|                                                  | outcome model              | outcome model              | outcome model              | outcome model       | outcome model        | outcome model        | outcome model        | outcome model        | outcome model        |
|                                                  | first-stage                | first-stage                | first-stage                | first-stage         | first-stage          | first-stage          | first-stage          | first-stage          | first-stage          |
|                                                  | weighted                   | weighted                   | weighted                   | weighted            | weighted             | weighted             | weighted             | weighted             | weighted             |
|                                                  | OLS                        | OLS                        | OLS                        | OLS                 | OLS                  | OLS                  | OLS                  | OLS                  | OLS                  |
|                                                  | parsimonious specification | parsimonious specification | parsimonious specification | parsimonious_v2     | parsimonious_v2      | parsimonious_v2      | parsimonious_v3      | parsimonious_v3      | parsimonious_v3      |
| VARIABLES                                        |                            |                            |                            |                     |                      |                      |                      |                      |                      |
| DFT index, public health expenditure, 2013/14    | 0.011<br>[0.027]           | 0.054<br>[0.061]           | 0.737***<br>[0.050]        | 0.022<br>[0.026]    | 0.033<br>[0.067]     | 0.736***<br>[0.045]  | 0.021<br>[0.026]     | 0.039<br>[0.064]     | 0.755***<br>[0.054]  |
| MFF, public health expenditure, 2013/14          | 0.099<br>[0.438]           | 1.033<br>[1.010]           | 0.945<br>[1.016]           |                     |                      |                      |                      |                      |                      |
| DFT index, NHS healthcare expenditure            | 0.537***<br>[0.155]        | 0.012<br>[0.359]           | 0.590**<br>[0.276]         | 0.536***<br>[0.151] | 0.009<br>[0.380]     | 0.587**<br>[0.279]   | 0.541***<br>[0.158]  | 0.045<br>[0.391]     | 0.633*<br>[0.326]    |
| Age index, prescribing cost formula              | 0.234***<br>[0.084]        | 0.230<br>[0.197]           | -1.080***<br>[0.270]       | 0.226***<br>[0.084] | 0.179<br>[0.201]     | -1.129***<br>[0.276] | 0.250***<br>[0.076]  | 0.077<br>[0.208]     | -1.423***<br>[0.262] |
| MFF, resource allocation HCHS formula            | -0.425<br>[0.488]          | -1.459<br>[1.093]          | -1.619<br>[1.203]          |                     |                      |                      |                      |                      |                      |
| Type of LA: London borough                       | 0.036<br>[0.024]           | -0.113**<br>[0.054]        | -0.034<br>[0.058]          |                     |                      |                      |                      |                      |                      |
| Type of LA: Metropolitan district                | 0.017<br>[0.017]           | -0.113***<br>[0.030]       | 0.010<br>[0.043]           | 0.017<br>[0.015]    | -0.068**<br>[0.030]  | 0.041<br>[0.038]     | 0.008<br>[0.013]     | -0.056**<br>[0.023]  | 0.030<br>[0.029]     |
| Type of LA: Unitary authority                    | 0.002<br>[0.011]           | -0.025<br>[0.026]          | 0.053<br>[0.032]           | 0.003<br>[0.009]    | 0.004<br>[0.026]     | 0.075***<br>[0.028]  |                      |                      |                      |
| Area cost adj for older people's social services | 0.270<br>[0.281]           | 0.527<br>[0.590]           | 0.444<br>[0.454]           | 0.215<br>[0.182]    | -0.131<br>[0.425]    | -0.051<br>[0.407]    |                      |                      |                      |
| Population sparsity measure                      | 0.820<br>[0.719]           | -4.418*<br>[2.314]         | -8.406***<br>[2.403]       | 1.300**<br>[0.653]  | -3.199<br>[2.360]    | -6.998***<br>[2.250] |                      |                      |                      |
| % households that are owner occupied             | -0.114**<br>[0.055]        | -0.356***<br>[0.107]       | -0.163<br>[0.128]          | -0.107**<br>[0.053] | -0.466***<br>[0.106] | -0.233**<br>[0.117]  | -0.148***<br>[0.051] | -0.377***<br>[0.091] | 0.007<br>[0.099]     |
| Index of Multiple Deprivation 2010               | -0.028<br>[0.051]          | 0.135<br>[0.106]           | 0.218*<br>[0.119]          | -0.007<br>[0.053]   | 0.062<br>[0.103]     | 0.192*<br>[0.102]    | -0.008<br>[0.054]    | 0.041<br>[0.110]     | 0.122<br>[0.113]     |
| % population in white ethnic group               | 0.079*<br>[0.042]          | 0.135*<br>[0.071]          | 0.152*<br>[0.084]          | 0.073*<br>[0.044]   | 0.208***<br>[0.072]  | 0.194**<br>[0.078]   | 0.073*<br>[0.041]    | 0.190***<br>[0.065]  | 0.180*<br>[0.092]    |
| % population providing unpaid care               | -0.101<br>[0.092]          | 0.385*<br>[0.230]          | -0.017<br>[0.205]          | -0.073<br>[0.091]   | 0.429*<br>[0.220]    | 0.048<br>[0.207]     | -0.053<br>[0.093]    | 0.340*<br>[0.194]    | -0.270<br>[0.236]    |
| % population aged 16-74 permanently sick         | 0.039<br>[0.061]           | -0.019<br>[0.116]          | 0.270**<br>[0.111]         | 0.036<br>[0.061]    | 0.007<br>[0.118]     | 0.284**<br>[0.110]   | 0.021<br>[0.059]     | 0.072<br>[0.111]     | 0.481***<br>[0.124]  |
| % aged 16-74 in managerial/prof occupations      | -0.104**<br>[0.045]        | 0.211**<br>[0.094]         | -0.121<br>[0.094]          | -0.097**<br>[0.046] | 0.186*<br>[0.103]    | -0.129<br>[0.092]    | -0.083**<br>[0.038]  | 0.183**<br>[0.090]   | -0.158*<br>[0.093]   |
| Constant                                         | 6.841***<br>[0.294]        | -0.557<br>[0.533]          | 3.800***<br>[0.542]        | 6.844***<br>[0.300] | -0.241<br>[0.551]    | 4.028***<br>[0.555]  | 6.863***<br>[0.300]  | -0.166<br>[0.569]    | 4.191***<br>[0.609]  |
| Observations                                     | 150                        | 150                        | 150                        | 150                 | 150                  | 150                  | 150                  | 150                  | 150                  |
| Robust standard errors in brackets               |                            |                            |                            |                     |                      |                      |                      |                      |                      |
| *** p<0.01, ** p<0.05, * p<0.1                   |                            |                            |                            |                     |                      |                      |                      |                      |                      |

Table A1 continued (created by the authors)

## Obtaining a preferred health outcome specification for social care, healthcare and public health expenditure, backward selection, first-stage results

|                                               | (10)             | (11)               | (12)             | (13)             | (14)               | (15)             |
|-----------------------------------------------|------------------|--------------------|------------------|------------------|--------------------|------------------|
|                                               | All causes       | All causes         | All causes       | All causes       | All causes         | All causes       |
|                                               | 2013/14 PB spend | 2013/14 G_SS spend | 2013/14 PH spend | 2013/14 PB spend | 2013/14 G_SS spend | 2013/14 PH spend |
|                                               | SYLLR 2013/14/15 | SYLLR 2013/14/15   | SYLLR 2013/14/15 | SYLLR 2013/14/15 | SYLLR 2013/14/15   | SYLLR 2013/14/15 |
|                                               | outcome model    | outcome model      | outcome model    | outcome model    | outcome model      | outcome model    |
|                                               | first-stage      | first-stage        | first-stage      | first-stage      | first-stage        | first-stage      |
|                                               | weighted         | weighted           | weighted         | weighted         | weighted           | weighted         |
|                                               | OLS              | OLS                | OLS              | OLS              | OLS                | OLS              |
|                                               | parsimonious_v4  | parsimonious_v4    | parsimonious_v4  | parsimonious_v5  | parsimonious_v5    | parsimonious_v5  |
| VARIABLES                                     |                  |                    |                  |                  |                    |                  |
| DFT index, public health expenditure, 2013/14 | 0.014            | 0.062              | 0.764***         | 0.027            | 0.083              | 0.761***         |
|                                               | [0.027]          | [0.055]            | [0.058]          | [0.026]          | [0.054]            | [0.056]          |
| DFT index, NHS healthcare expenditure         | 0.592***         | -0.136             | 0.566*           | 0.594***         | -0.131             | 0.565*           |
|                                               | [0.158]          | [0.344]            | [0.340]          | [0.161]          | [0.344]            | [0.340]          |
| Age index, prescribing cost formula           | 0.218***         | 0.190              | -1.382***        | 0.227***         | 0.205              | -1.384***        |
|                                               | [0.080]          | [0.217]            | [0.286]          | [0.085]          | [0.226]            | [0.284]          |
| Type of LA: Metropolitan district             | 0.012            | -0.069***          | 0.026            | 0.004            | -0.082***          | 0.027            |
|                                               | [0.013]          | [0.023]            | [0.029]          | [0.013]          | [0.024]            | [0.027]          |
| % households that are owner occupied          | -0.175***        | -0.282***          | 0.042            |                  |                    |                  |
|                                               | [0.051]          | [0.100]            | [0.117]          |                  |                    |                  |
| Index of Multiple Deprivation 2010            | 0.195            | -0.680*            | -0.145           | 0.079            | -0.868**           | -0.117           |
|                                               | [0.171]          | [0.351]            | [0.455]          | [0.154]          | [0.350]            | [0.421]          |
| % population in white ethnic group            | 0.078*           | 0.173**            | 0.173*           | 0.063            | 0.149**            | 0.177*           |
|                                               | [0.040]          | [0.067]            | [0.096]          | [0.040]          | [0.068]            | [0.095]          |
| % population providing unpaid care            | -0.037           | 0.284              | -0.291           | -0.189**         | 0.039              | -0.254           |
|                                               | [0.092]          | [0.205]            | [0.244]          | [0.094]          | [0.207]            | [0.232]          |
| % population aged 16-74 permanently sick      | 0.025            | 0.055              | 0.475***         | 0.056            | 0.104              | 0.467***         |
|                                               | [0.058]          | [0.107]            | [0.124]          | [0.063]          | [0.109]            | [0.124]          |
| % aged 16-74 in managerial/prof occupations   | -0.108***        | 0.273***           | -0.125           | -0.061           | 0.348***           | -0.136           |
|                                               | [0.039]          | [0.096]            | [0.110]          | [0.041]          | [0.083]            | [0.103]          |
| Index of Multiple Deprivation 2010 Squared    | -0.038           | 0.137**            | 0.051            | -0.011           | 0.180***           | 0.044            |
|                                               | [0.028]          | [0.058]            | [0.081]          | [0.025]          | [0.056]            | [0.073]          |
| Constant                                      | 6.615***         | 0.716              | 4.518***         | 6.605***         | 0.700              | 4.520***         |
|                                               | [0.382]          | [0.736]            | [0.815]          | [0.361]          | [0.763]            | [0.811]          |
| Observations                                  | 150              | 150                | 150              | 150              | 150                | 150              |
| Robust standard errors in brackets            |                  |                    |                  |                  |                    |                  |
| *** p<0.01, ** p<0.05, * p<0.1                |                  |                    |                  |                  |                    |                  |



Table A2 Obtaining a preferred health outcome specification for social care, healthcare and public health expenditure, forward selection, first-stage results

|                                                  | (1)                     | (2)                     | (3)                     | (4)              | (5)                | (6)              |
|--------------------------------------------------|-------------------------|-------------------------|-------------------------|------------------|--------------------|------------------|
|                                                  | All causes              | All causes              | All causes              | All causes       | All causes         | All causes       |
|                                                  | 2013/14 PB spend        | 2013/14 G_SS spend      | 2013/14 PH spend        | 2013/14 PB spend | 2013/14 G_SS spend | 2013/14 PH spend |
|                                                  | SYLLR 2013/14/15        | SYLLR 2013/14/15        | SYLLR 2013/14/15        | SYLLR 2013/14/15 | SYLLR 2013/14/15   | SYLLR 2013/14/15 |
|                                                  | outcome model           | outcome model           | outcome model           | outcome model    | outcome model      | outcome model    |
|                                                  | first-stage             | first-stage             | first-stage             | first-stage      | first-stage        | first-stage      |
|                                                  | weighted                | weighted                | weighted                | weighted         | weighted           | weighted         |
|                                                  | OLS                     | OLS                     | OLS                     | OLS              | OLS                | OLS              |
|                                                  | 'initial' specification | 'initial' specification | 'initial' specification | specification 2  | specification 2    | specification 2  |
| VARIABLES                                        |                         |                         |                         |                  |                    |                  |
| DFT index, public health expenditure, 2013/14    | 0.004                   | 0.062                   | 0.716***                | 0.016            | 0.048              | 0.717***         |
|                                                  | [0.029]                 | [0.059]                 | [0.054]                 | [0.027]          | [0.063]            | [0.049]          |
| MFF, public health expenditure, 2013/14          | 0.032                   | 107                     | 0.375                   |                  |                    |                  |
|                                                  | [0.430]                 | [0.988]                 | [1038]                  |                  |                    |                  |
| DFT index, NHS healthcare expenditure            | 0.444***                | 0.215                   | 0.530*                  | 0.460***         | 0.221              | 0.371            |
|                                                  | [0.144]                 | [0.342]                 | [0.286]                 | [0.140]          | [0.348]            | [0.256]          |
| Age index, prescribing cost formula              | 0.228***                | 0.246                   | -1077***                | 0.220***         | 0.176              | -1062***         |
|                                                  | [0.084]                 | [0.199]                 | [0.269]                 | [0.079]          | [0.194]            | [0.270]          |
| MFF, resource allocation HCHS formula            | -0.359                  | -1523                   | -1314                   |                  |                    |                  |
|                                                  | [0.482]                 | [1074]                  | [1213]                  |                  |                    |                  |
| Type of LA: London borough                       | 0.030                   | -0.090*                 | -0.003                  |                  |                    |                  |
|                                                  | [0.026]                 | [0.052]                 | [0.050]                 |                  |                    |                  |
| Type of LA: Metropolitan district                | 0.015                   | -0.105***               | 0.020                   | 0.016            | -0.070**           | 0.063**          |
|                                                  | [0.016]                 | [0.031]                 | [0.041]                 | [0.014]          | [0.028]            | [0.031]          |
| Type of LA: Unitary authority                    | 0.004                   | -0.029                  | 0.060*                  | 0.005            | -0.003             | 0.085***         |
|                                                  | [0.010]                 | [0.026]                 | [0.032]                 | [0.009]          | [0.025]            | [0.026]          |
| Area cost adj for older people's social services | 0.143                   | 0.718                   | 0.076                   |                  |                    |                  |
|                                                  | [0.254]                 | [0.626]                 | [0.460]                 |                  |                    |                  |
| Population sparsity measure                      | 0.843                   | -4.433*                 | -8.279***               | 1319**           | -3.410             | -5.890***        |
|                                                  | [0.720]                 | [2.392]                 | [2.362]                 | [0.666]          | [2.354]            | [2.141]          |
| % households that are owner occupied             | -0.101*                 | -0.403***               | -0.211*                 | -0.102*          | -0.502***          | -0.209*          |
|                                                  | [0.053]                 | [0.107]                 | [0.123]                 | [0.052]          | [0.101]            | [0.121]          |
| % population aged 16-74 permanently sick         | 0.052*                  | 0.026                   | 0.519***                | 0.066***         | -0.014             | 0.567***         |
|                                                  | [0.029]                 | [0.073]                 | [0.067]                 | [0.024]          | [0.066]            | [0.064]          |
| % population providing unpaid care               | -0.086                  | 0.300                   | -0.180                  | -0.074           | 0.394*             | -0.107           |
|                                                  | [0.086]                 | [0.217]                 | [0.196]                 | [0.084]          | [0.215]            | [0.202]          |
| % population in white ethnic group               | 0.050*                  | 0.161**                 | 0.014                   | 0.041            | 0.248***           | 0.048            |
|                                                  | [0.028]                 | [0.062]                 | [0.070]                 | [0.027]          | [0.065]            | [0.060]          |
| Older adults: social service need per person     |                         |                         |                         |                  |                    |                  |
| Constant                                         | 6.962***                | -0.480                  | 4.991***                | 7.038***         | -0.434             | 5.291***         |
|                                                  | [0.158]                 | [0.403]                 | [0.367]                 | [0.150]          | [0.370]            | [0.382]          |
| Observations                                     | 150                     | 150                     | 150                     | 150              | 150                | 150              |
| Robust standard errors in brackets               |                         |                         |                         |                  |                    |                  |
| *** p<0.01, ** p<0.05, * p<0.1                   |                         |                         |                         |                  |                    |                  |

Table A2 continued (created by the authors)

## Obtaining a preferred health outcome specification for social care, healthcare and public health expenditure, forward selection, first-stage results

|                                                  | (7)                  | (8)                  | (9)                  | (10)                    | (11)                    | (12)                   |
|--------------------------------------------------|----------------------|----------------------|----------------------|-------------------------|-------------------------|------------------------|
|                                                  | All causes           | All causes           | All causes           | All causes              | All causes              | All causes             |
|                                                  | 2013/14 PB spend     | 2013/14 G_SS spend   | 2013/14 PH spend     | 2013/14 PB spend        | 2013/14 G_SS spend      | 2013/14 PH spend       |
|                                                  | SYLLR 2013/14/15     | SYLLR 2013/14/15     | SYLLR 2013/14/15     | SYLLR 2013/14/15        | SYLLR 2013/14/15        | SYLLR 2013/14/15       |
|                                                  | outcome model        | outcome model        | outcome model        | outcome model           | outcome model           | outcome model          |
|                                                  | first-stage          | first-stage          | first-stage          | first-stage             | first-stage             | first-stage            |
|                                                  | weighted             | weighted             | weighted             | weighted                | weighted                | weighted               |
|                                                  | OLS                  | OLS                  | OLS                  | OLS                     | OLS                     | OLS                    |
|                                                  | specification 3      | specification 3      | specification 3      | preferred specification | preferred specification | referred specification |
| VARIABLES                                        |                      |                      |                      |                         |                         |                        |
| DFI index, public health expenditure, 2013/14    | 0.012<br>[0.026]     | 0.057<br>[0.064]     | 0.734***<br>[0.057]  | 0.020<br>[0.026]        | 0.075<br>[0.061]        | 0.728***<br>[0.056]    |
| MFF, public health expenditure, 2013/14          |                      |                      |                      |                         |                         |                        |
| DFI index, NHS healthcare expenditure            | 0.413***<br>[0.132]  | 0.321<br>[0.351]     | 0.352<br>[0.285]     | 0.451***<br>[0.127]     | 0.291<br>[0.338]        | 0.255<br>[0.284]       |
| Age index, prescribing cost formula              | 0.266***<br>[0.072]  | 0.050<br>[0.210]     | -1.345***<br>[0.253] | 0.279***<br>[0.077]     | 0.212<br>[0.207]        | -1.279***<br>[0.257]   |
| MFF, resource allocation HCHS formula            |                      |                      |                      |                         |                         |                        |
| Type of LA: London borough                       |                      |                      |                      |                         |                         |                        |
| Type of LA: Metropolitan district                | 0.009<br>[0.012]     | -0.057**<br>[0.023]  | 0.039<br>[0.027]     | 0.004<br>[0.013]        | -0.080***<br>[0.023]    | 0.037<br>[0.026]       |
| Type of LA: Unitary authority                    |                      |                      |                      |                         |                         |                        |
| Area cost adj for older people's social services |                      |                      |                      |                         |                         |                        |
| Population sparsity measure                      |                      |                      |                      |                         |                         |                        |
| % households that are owner occupied             | -0.129***<br>[0.049] | -0.422***<br>[0.085] | 0.026<br>[0.100]     |                         |                         |                        |
| % population aged 16-74 permanently sick         | 0.056**<br>[0.024]   | 0.019<br>[0.045]     | 0.699***<br>[0.059]  | 0.069**<br>[0.029]      | -0.088<br>[0.062]       | 0.610***<br>[0.064]    |
| % population providing unpaid care               | -0.055<br>[0.088]    | 0.328*<br>[0.191]    | -0.372<br>[0.227]    | -0.158*<br>[0.085]      | 0.178<br>[0.191]        | -0.245<br>[0.212]      |
| % population in white ethnic group               | 0.048*<br>[0.026]    | 0.235***<br>[0.064]  | 0.064<br>[0.068]     | 0.047*<br>[0.026]       | 0.294***<br>[0.068]     | 0.100<br>[0.068]       |
| Older adults: social service need per person     |                      |                      |                      | 0.068<br>[0.058]        | 0.583***<br>[0.113]     | 0.193<br>[0.120]       |
| Constant                                         | 7.052***<br>[0.154]  | -0.473<br>[0.361]    | 5.208***<br>[0.421]  | 6.925***<br>[0.152]     | -0.914**<br>[0.360]     | 5.218***<br>[0.423]    |
| Observations                                     | 150                  | 150                  | 150                  | 150                     | 150                     | 150                    |
| Robust standard errors in brackets               |                      |                      |                      |                         |                         |                        |
| *** p<0.01, ** p<0.05, * p<0.1                   |                      |                      |                      |                         |                         |                        |

STROBE Statement—Checklist of items that should be included in reports of *cross-sectional studies*

|                              | Item No | Recommendation                                                                                                                                                                                    | Page No     |
|------------------------------|---------|---------------------------------------------------------------------------------------------------------------------------------------------------------------------------------------------------|-------------|
| <b>Title and abstract</b>    | 1       | (a) Indicate the study's design with a commonly used term in the title or the abstract                                                                                                            | 1, 4        |
|                              |         | (b) Provide in the abstract an informative and balanced summary of what was done and what was found                                                                                               | 4           |
| <b>Introduction</b>          |         |                                                                                                                                                                                                   |             |
| Background/rationale         | 2       | Explain the scientific background and rationale for the investigation being reported                                                                                                              | 6           |
| Objectives                   | 3       | State specific objectives, including any prespecified hypotheses                                                                                                                                  | 4, 6        |
| <b>Methods</b>               |         |                                                                                                                                                                                                   |             |
| Study design                 | 4       | Present key elements of study design early in the paper                                                                                                                                           | 6-7         |
| Setting                      | 5       | Describe the setting, locations, and relevant dates, including periods of recruitment, exposure, follow-up, and data collection                                                                   | 6-7         |
| Participants                 | 6       | (a) Give the eligibility criteria, and the sources and methods of selection of participants                                                                                                       | 6           |
| Variables                    | 7       | Clearly define all outcomes, exposures, predictors, potential confounders, and effect modifiers. Give diagnostic criteria, if applicable                                                          | 8-13        |
| Data sources/<br>measurement | 8*      | For each variable of interest, give sources of data and details of methods of assessment (measurement). Describe comparability of assessment methods if there is more than one group              | 8-13        |
| Bias                         | 9       | Describe any efforts to address potential sources of bias                                                                                                                                         | 8-12        |
| Study size                   | 10      | Explain how the study size was arrived at                                                                                                                                                         | 12-13       |
| Quantitative variables       | 11      | Explain how quantitative variables were handled in the analyses. If applicable, describe which groupings were chosen and why                                                                      | 8-13        |
| Statistical methods          | 12      | (a) Describe all statistical methods, including those used to control for confounding                                                                                                             | 8-12, Fig 1 |
|                              |         | (b) Describe any methods used to examine subgroups and interactions                                                                                                                               | None        |
|                              |         | (c) Explain how missing data were addressed                                                                                                                                                       | n/a         |
|                              |         | (d) If applicable, describe analytical methods taking account of sampling strategy                                                                                                                |             |
|                              |         | (e) Describe any sensitivity analyses                                                                                                                                                             | n/a         |
| <b>Results</b>               |         |                                                                                                                                                                                                   |             |
| Participants                 | 13*     | (a) Report numbers of individuals at each stage of study—eg numbers potentially eligible, examined for eligibility, confirmed eligible, included in the study, completing follow-up, and analysed | Table 1     |
|                              |         | (b) Give reasons for non-participation at each stage                                                                                                                                              | n/a         |
|                              |         | (c) Consider use of a flow diagram                                                                                                                                                                | n/a         |
| Descriptive data             | 14*     | (a) Give characteristics of study participants (eg demographic, clinical, social) and information on exposures and potential confounders                                                          | Table 1     |
|                              |         | (b) Indicate number of participants with missing data for each variable of interest                                                                                                               | Table 1     |
| Outcome data                 | 15*     | Report numbers of outcome events or summary measures                                                                                                                                              | Table 1     |

1  
2  
3  
4  
5  
6  
7  
8  
9  
10  
11  
12  
13  
14  
15  
16  
17  
18  
19  
20  
21  
22  
23  
24  
25  
26  
27  
28  
29  
30  
31  
32  
33  
34  
35  
36  
37  
38  
39  
40  
41  
42  
43  
44  
45  
46  
47  
48  
49  
50  
51  
52  
53  
54  
55  
56  
57  
58  
59  
60

|                          |    |                                                                                                                                                                                                              |                      |
|--------------------------|----|--------------------------------------------------------------------------------------------------------------------------------------------------------------------------------------------------------------|----------------------|
| Main results             | 16 | (a) Give unadjusted estimates and, if applicable, confounder-adjusted estimates and their precision (eg, 95% confidence interval). Make clear which confounders were adjusted for and why they were included | Tables 2, 3, & 4     |
|                          |    | (b) Report category boundaries when continuous variables were categorized                                                                                                                                    | n/a                  |
|                          |    | (c) If relevant, consider translating estimates of relative risk into absolute risk for a meaningful time period                                                                                             | n/a                  |
| Other analyses           | 17 | Report other analyses done—eg analyses of subgroups and interactions, and sensitivity analyses                                                                                                               | Cf Table 2 & Table 3 |
| <b>Discussion</b>        |    |                                                                                                                                                                                                              |                      |
| Key results              | 18 | Summarise key results with reference to study objectives                                                                                                                                                     | Table 4              |
| Limitations              | 19 | Discuss limitations of the study, taking into account sources of potential bias or imprecision. Discuss both direction and magnitude of any potential bias                                                   | 16-17                |
| Interpretation           | 20 | Give a cautious overall interpretation of results considering objectives, limitations, multiplicity of analyses, results from similar studies, and other relevant evidence                                   | 14-16                |
| Generalisability         | 21 | Discuss the generalisability (external validity) of the study results                                                                                                                                        | 16-17                |
| <b>Other information</b> |    |                                                                                                                                                                                                              |                      |
| Funding                  | 22 | Give the source of funding and the role of the funders for the present study and, if applicable, for the original study on which the present article is based                                                | 2                    |

\*Give information separately for exposed and unexposed groups.

**Note:** An Explanation and Elaboration article discusses each checklist item and gives methodological background and published examples of transparent reporting. The STROBE checklist is best used in conjunction with this article (freely available on the Web sites of PLoS Medicine at <http://www.plosmedicine.org/>, Annals of Internal Medicine at <http://www.annals.org/>, and Epidemiology at <http://www.epidem.com/>). Information on the STROBE Initiative is available at [www.strobe-statement.org](http://www.strobe-statement.org).
